# Supplementary material
Source: PubMed Central journal article supplement (PMC3317592)
Supplement: jp9074674_si_001.pdf [file jp9074674_si_001.pdf]

# Supporting Information for “Optoelectronic Properties of Carbon Nanorings: Excitonic Effects from Time-Dependent Density Functional Theory”

*Bryan M. Wong\**

Materials Chemistry Department, Sandia National Laboratories, Livermore, California 94551

\*Corresponding author. E-mail: [bmwong@sandia.gov](mailto:bmwong@sandia.gov)

## Contents

- p. S2, Table SI-1:** TDDFT  $S_n \leftarrow S_0$  excitation energies and oscillator strengths up to  $S_4$  for the cyclic paraphenylenes
- p. S3, Table SI-2:** TDDFT  $S_n \leftarrow S_0$  excitation energies and oscillator strengths up to  $S_4$  for the linear paraphenylenes
- p. S4-S8, Figure SI-1:** Coordinate ( $\mathbf{Q}_1$ ) density matrices for all the cyclic and linear paraphenylenes
- p. S9-S13, Figure SI-2:** Momentum ( $\mathbf{P}_1$ ) density matrices for all the cyclic and linear paraphenylenes
- p. S14, Figure SI-3:** (a) NICS(1) values of individual benzene rings and (b) dihedral angle between adjacent benzene rings for the  $N = 18$  cycloparaphenylene
- p. S15-S44,** Cartesian coordinates for all the cyclic paraphenylenes optimized at the PBE0/6-31G(d,p) level of theory
- p. S45-S74,** Cartesian coordinates for all the linear paraphenylenes optimized at the PBE0/6-31G(d,p) level of theory

**Table SI-1.**  $S_n \leftarrow S_0$  excitation energies and oscillator strengths up to  $S_4$  for the cyclic paraphenylenes. All properties were computed from PBE0/6-31+G(d,p) TDDFT calculations at PBE0/6-31G(d,p)-optimized geometries.

| Number of<br>benzene rings | $S_1$ State              |                        | $S_2$ State              |                        | $S_3$ State              |                        | $S_4$ State              |                        |
|----------------------------|--------------------------|------------------------|--------------------------|------------------------|--------------------------|------------------------|--------------------------|------------------------|
|                            | $E_{\text{opt}}$<br>(eV) | Oscillator<br>Strength | $E_{\text{opt}}$<br>(eV) | Oscillator<br>Strength | $E_{\text{opt}}$<br>(eV) | Oscillator<br>Strength | $E_{\text{opt}}$<br>(eV) | Oscillator<br>Strength |
| 5                          | 2.08                     | 0.0022                 | 3.50                     | 0.0168                 | 3.53                     | 0.0109                 | 3.56                     | 0.0004                 |
| 6                          | 2.29                     | 0.0000                 | 3.43                     | 0.0056                 | 3.57                     | 0.0001                 | 3.63                     | 0.5459                 |
| 7                          | 2.50                     | 0.0016                 | 3.48                     | 0.0002                 | 3.53                     | 0.0010                 | 3.60                     | 1.2204                 |
| 8                          | 2.96                     | 0.0000                 | 3.71                     | 1.1785                 | 3.71                     | 1.1808                 | 3.74                     | 0.1596                 |
| 9                          | 3.00                     | 0.0170                 | 3.61                     | 1.6001                 | 3.66                     | 1.4770                 | 3.68                     | 0.0133                 |
| 10                         | 2.98                     | 0.0000                 | 3.46                     | 1.9694                 | 3.58                     | 0.0002                 | 3.60                     | 1.6925                 |
| 11                         | 3.16                     | 0.0266                 | 3.57                     | 2.0466                 | 3.61                     | 1.9538                 | 3.75                     | 0.0042                 |
| 12                         | 3.24                     | 0.0000                 | 3.60                     | 2.2387                 | 3.60                     | 2.2389                 | 3.82                     | 0.0044                 |
| 13                         | 3.20                     | 0.0012                 | 3.52                     | 2.5531                 | 3.53                     | 2.4691                 | 3.75                     | 0.0018                 |
| 14                         | 3.30                     | 0.0000                 | 3.57                     | 2.7355                 | 3.57                     | 2.7334                 | 3.84                     | 0.0023                 |
| 15                         | 3.29                     | 0.0416                 | 3.53                     | 3.0027                 | 3.56                     | 2.9460                 | 3.82                     | 0.0017                 |
| 16                         | 3.30                     | 0.0476                 | 3.52                     | 3.2317                 | 3.53                     | 3.2360                 | 3.82                     | 0.0010                 |
| 17                         | 3.30                     | 0.0001                 | 3.49                     | 3.5386                 | 3.51                     | 3.5344                 | 3.82                     | 0.0015                 |
| 18                         | 3.35                     | 0.0000                 | 3.54                     | 3.8007                 | 3.54                     | 3.8010                 | 3.88                     | 0.0010                 |

**Table SI-2.**  $S_n \leftarrow S_0$  excitation energies and oscillator strengths up to  $S_4$  for the linear paraphenylenes. All properties were computed from PBE0/6-31+G(d,p) TDDFT calculations at PBE0/6-31G(d,p)-optimized geometries.

| Number of<br>benzene rings | $S_1$ State              |                        | $S_2$ State              |                        | $S_3$ State              |                        | $S_4$ State              |                        |
|----------------------------|--------------------------|------------------------|--------------------------|------------------------|--------------------------|------------------------|--------------------------|------------------------|
|                            | $E_{\text{opt}}$<br>(eV) | Oscillator<br>Strength | $E_{\text{opt}}$<br>(eV) | Oscillator<br>Strength | $E_{\text{opt}}$<br>(eV) | Oscillator<br>Strength | $E_{\text{opt}}$<br>(eV) | Oscillator<br>Strength |
| 5                          | 3.91                     | 1.8285                 | 4.59                     | 0.0000                 | 4.61                     | 0.0000                 | 4.62                     | 0.0000                 |
| 6                          | 3.78                     | 2.2541                 | 4.37                     | 0.0000                 | 4.41                     | 0.0000                 | 4.57                     | 0.0000                 |
| 7                          | 3.71                     | 2.6725                 | 4.20                     | 0.0000                 | 4.30                     | 0.0000                 | 4.64                     | 0.4837                 |
| 8                          | 3.66                     | 3.0789                 | 4.08                     | 0.0000                 | 4.22                     | 0.0000                 | 4.48                     | 0.5345                 |
| 9                          | 3.61                     | 3.5264                 | 3.97                     | 0.0000                 | 4.15                     | 0.0000                 | 4.32                     | 0.5587                 |
| 10                         | 3.58                     | 3.9501                 | 3.89                     | 0.0000                 | 4.11                     | 0.0000                 | 4.21                     | 0.5730                 |
| 11                         | 3.54                     | 4.4077                 | 3.82                     | 0.0000                 | 4.06                     | 0.0000                 | 4.11                     | 0.5800                 |
| 12                         | 3.54                     | 4.8329                 | 3.78                     | 0.0000                 | 4.04                     | 0.5959                 | 4.05                     | 0.0000                 |
| 13                         | 3.52                     | 5.2740                 | 3.74                     | 0.0000                 | 3.98                     | 0.6066                 | 4.03                     | 0.0000                 |
| 14                         | 3.51                     | 5.7074                 | 3.70                     | 0.0000                 | 3.92                     | 0.6424                 | 4.01                     | 0.0000                 |
| 15                         | 3.50                     | 6.1498                 | 3.67                     | 0.0030                 | 3.88                     | 0.6591                 | 4.00                     | 0.0000                 |
| 16                         | 3.49                     | 6.6009                 | 3.65                     | 0.0057                 | 3.83                     | 0.6811                 | 3.98                     | 0.0000                 |
| 17                         | 3.48                     | 7.0545                 | 3.62                     | 0.0036                 | 3.80                     | 0.7112                 | 3.97                     | 0.0000                 |
| 18                         | 3.48                     | 7.5154                 | 3.61                     | 0.0072                 | 3.77                     | 0.7229                 | 3.94                     | 0.0006                 |

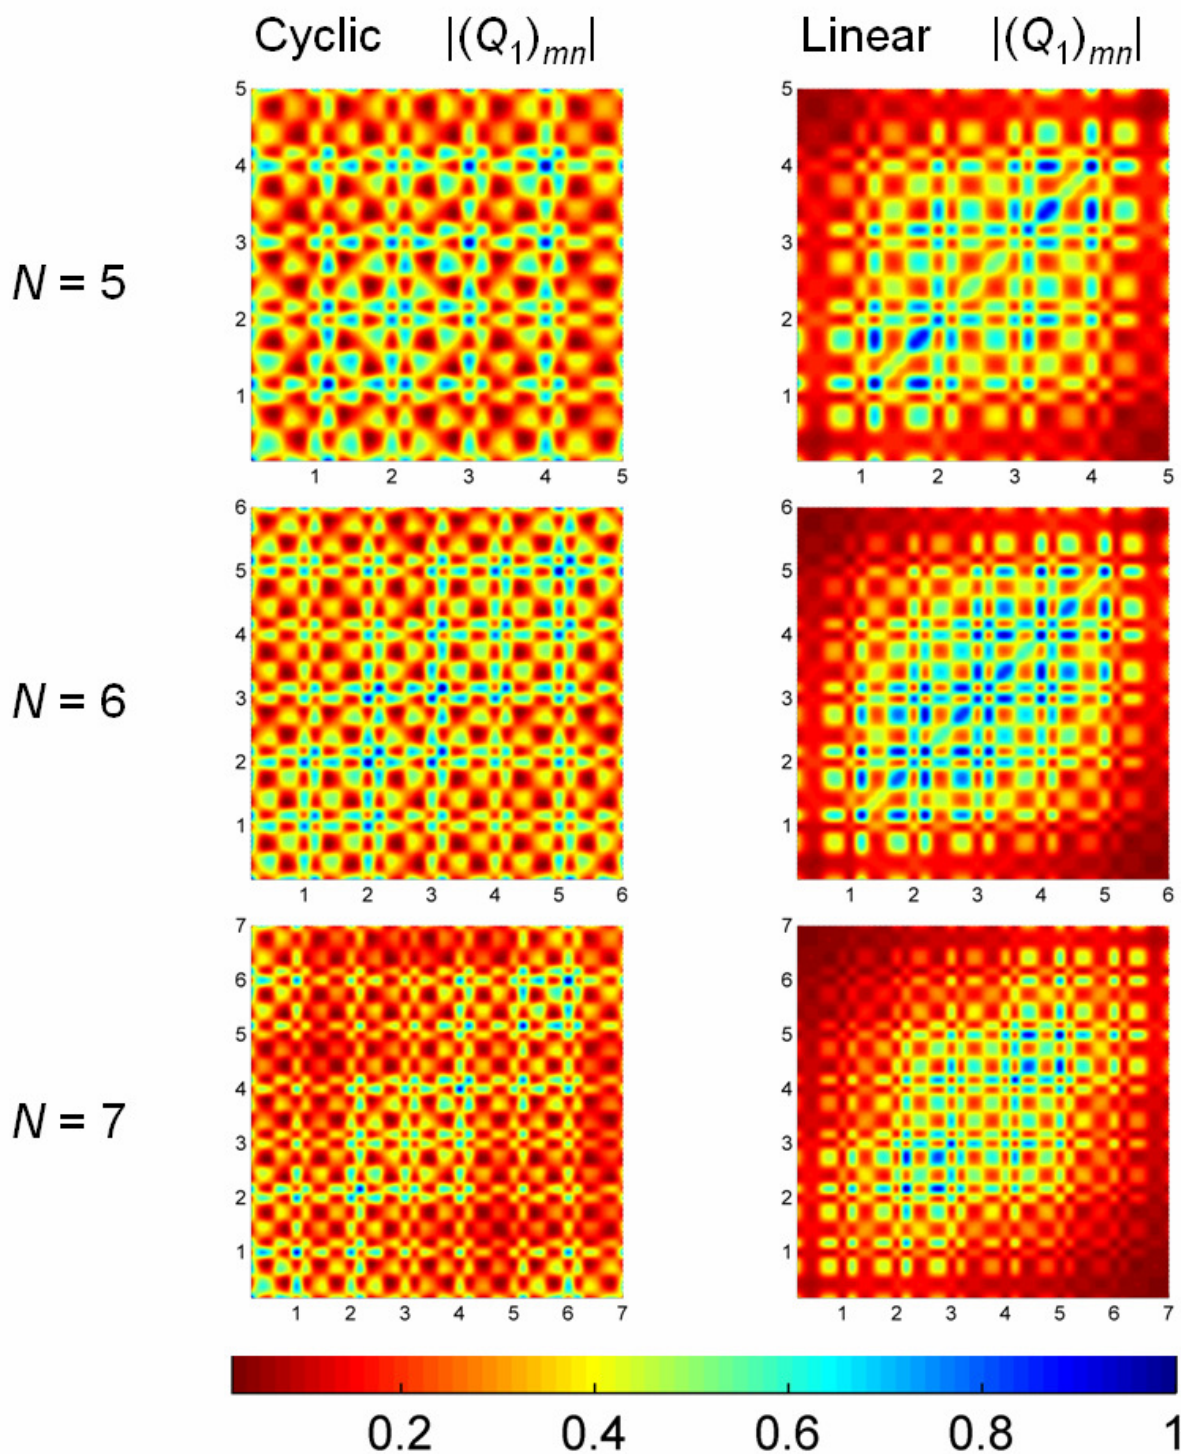

**Figure SI-1.** Contour plots of coordinate density matrices ( $\mathbf{Q}_1$ ) for the lowest excitation energy ( $S_1 \leftarrow S_0$ ) in the cyclic and linear paraphenylenes. The  $x$ - and  $y$ -axis labels represent the number of benzene repeat units in the molecule. The elements of the coordinate matrix,  $Q_{mn}$ , give a measure of exciton delocalization between sites  $m$  ( $x$ -axis) and  $n$  ( $y$ -axis). The color scale is given at the bottom.

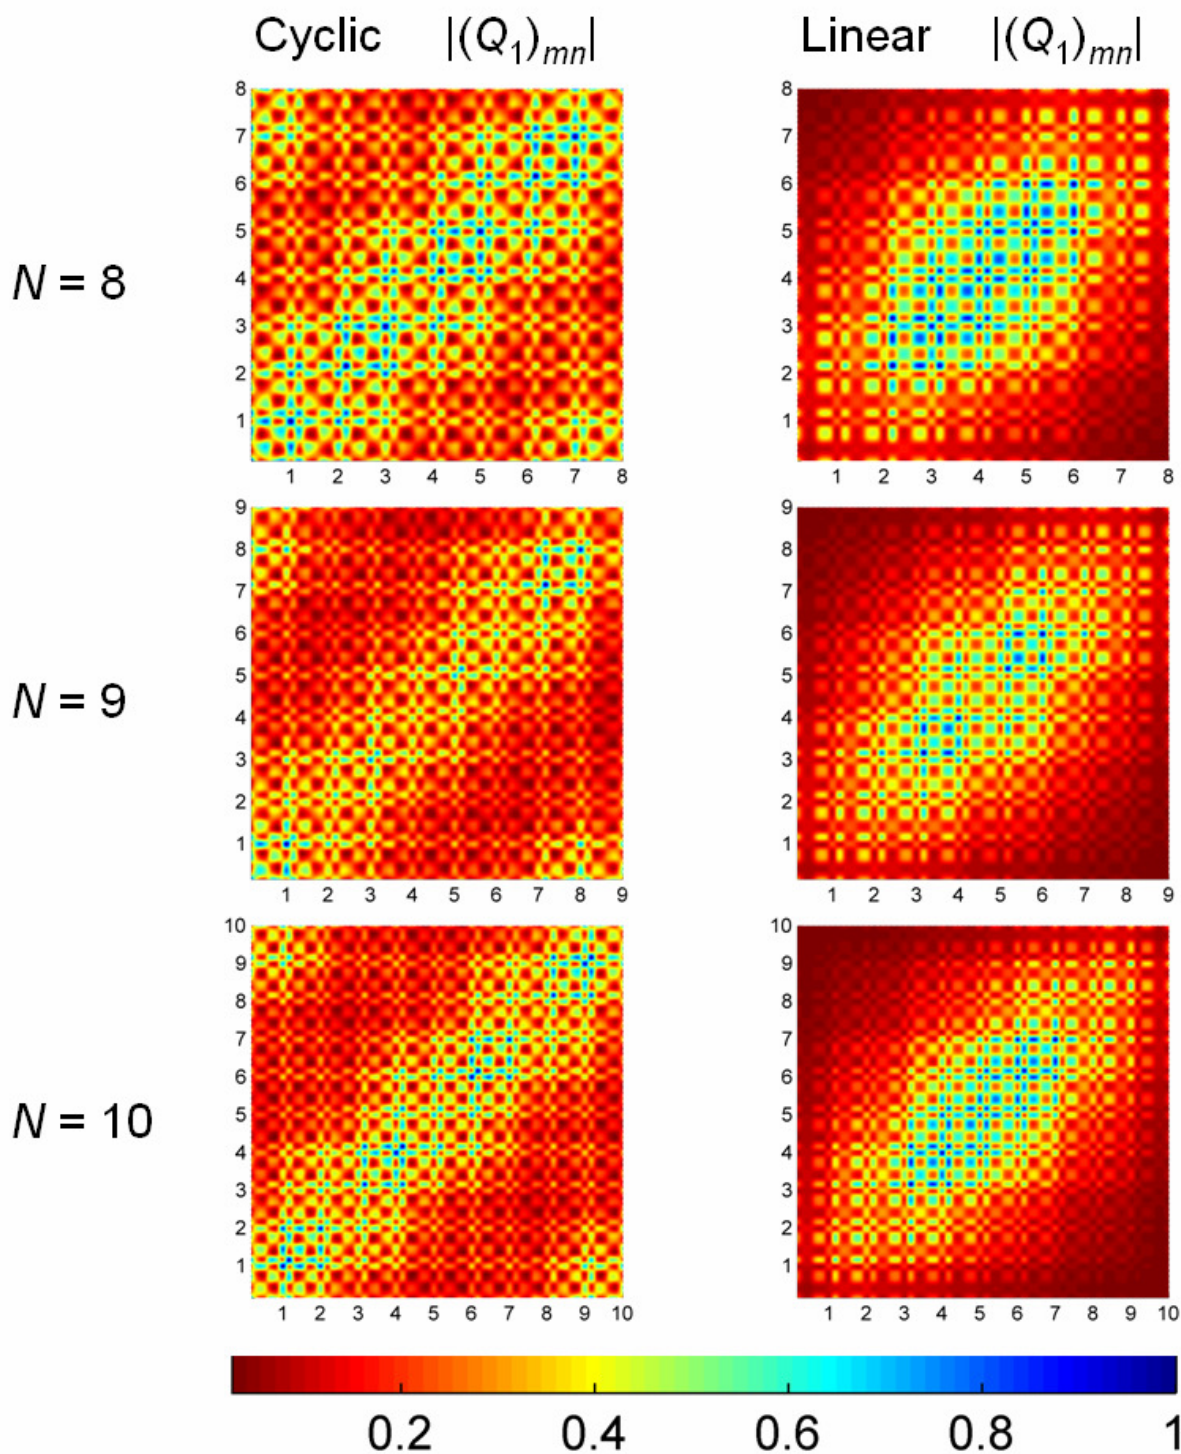

**Figure SI-1 (continued).** Contour plots of coordinate density matrices ( $\mathbf{Q}_1$ ) for the lowest excitation energy ( $S_1 \leftarrow S_0$ ) in the cyclic and linear paraphenylenes. The  $x$ - and  $y$ -axis labels represent the number of benzene repeat units in the molecule. The elements of the coordinate matrix,  $Q_{mn}$ , give a measure of exciton delocalization between sites  $m$  ( $x$ -axis) and  $n$  ( $y$ -axis). The color scale is given at the bottom.

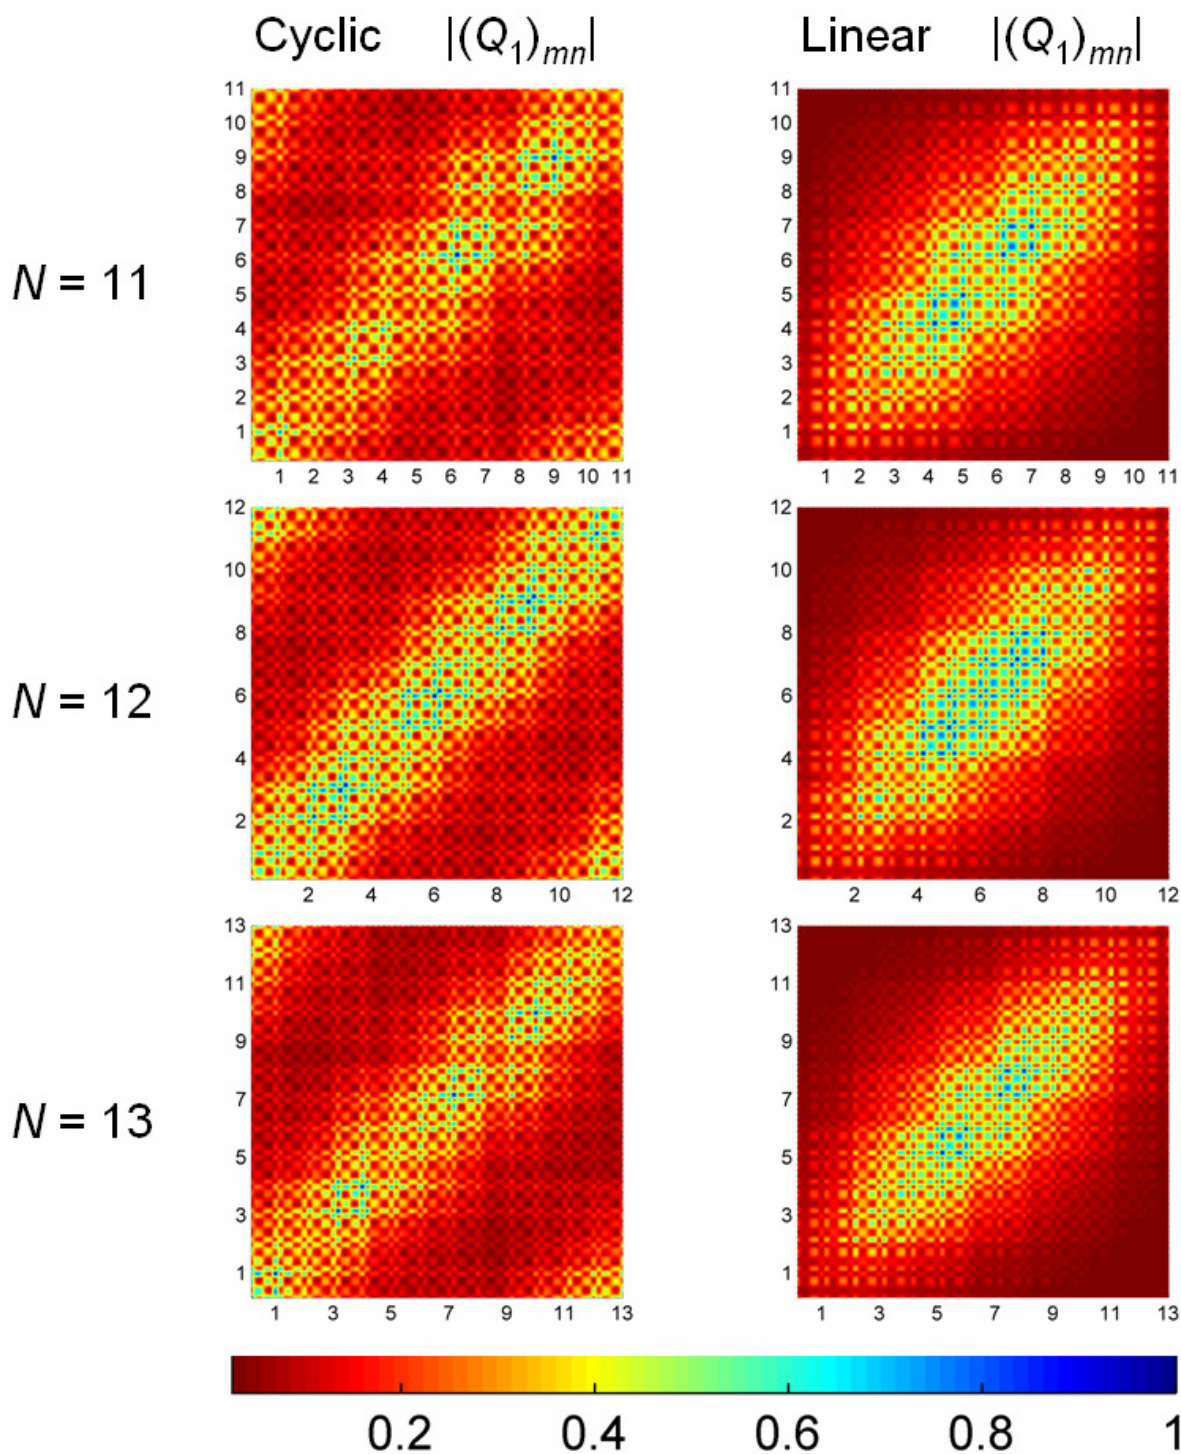

**Figure SI-1 (continued).** Contour plots of coordinate density matrices ( $\mathbf{Q}_1$ ) for the lowest excitation energy ( $S_1 \leftarrow S_0$ ) in the cyclic and linear paraphenylenes. The  $x$ - and  $y$ -axis labels represent the number of benzene repeat units in the molecule. The elements of the coordinate matrix,  $Q_{mn}$ , give a measure of exciton delocalization between sites  $m$  ( $x$ -axis) and  $n$  ( $y$ -axis). The color scale is given at the bottom.

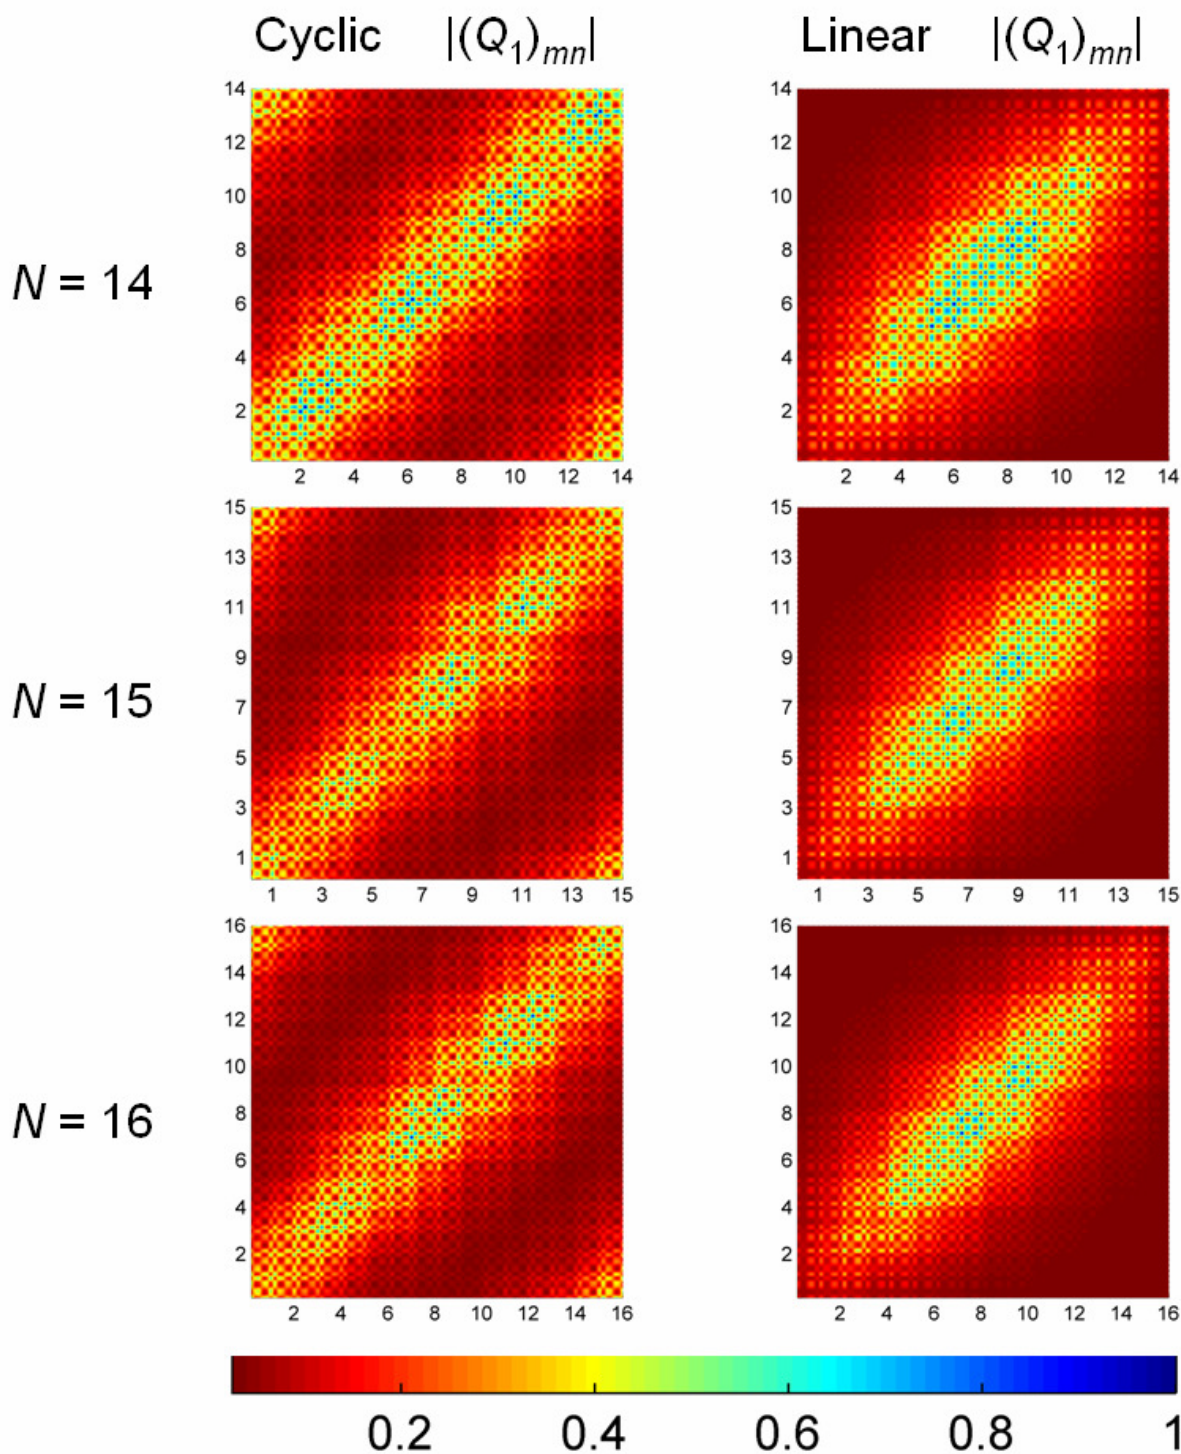

**Figure SI-1 (continued).** Contour plots of coordinate density matrices ( $\mathbf{Q}_1$ ) for the lowest excitation energy ( $S_1 \leftarrow S_0$ ) in the cyclic and linear paraphenylenes. The  $x$ - and  $y$ -axis labels represent the number of benzene repeat units in the molecule. The elements of the coordinate matrix,  $Q_{mn}$ , give a measure of exciton delocalization between sites  $m$  ( $x$ -axis) and  $n$  ( $y$ -axis). The color scale is given at the bottom.

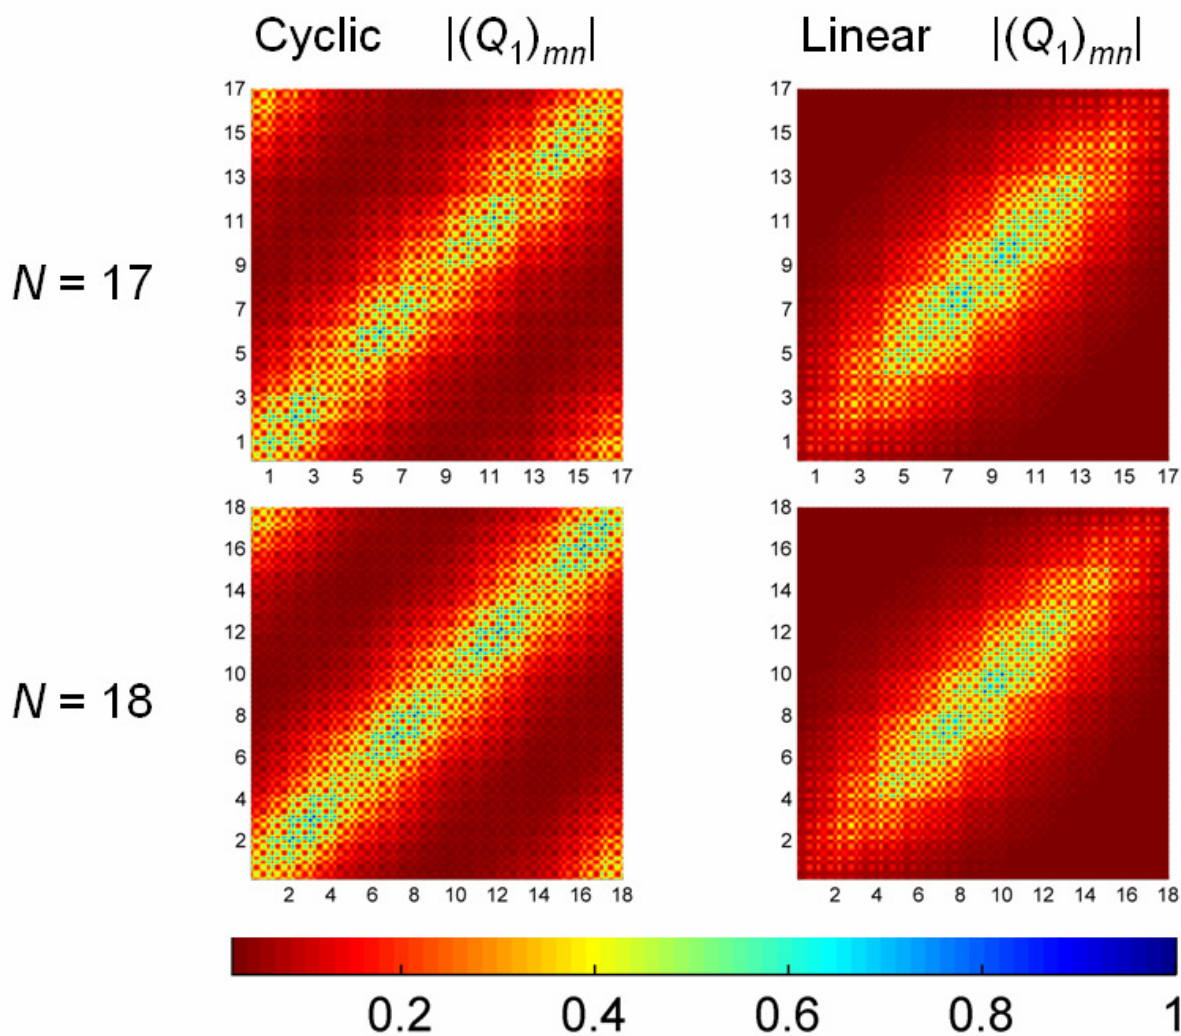

**Figure SI-1 (continued).** Contour plots of coordinate density matrices ( $\mathbf{Q}_1$ ) for the lowest excitation energy ( $S_1 \leftarrow S_0$ ) in the cyclic and linear paraphenylenes. The  $x$ - and  $y$ -axis labels represent the number of benzene repeat units in the molecule. The elements of the coordinate matrix,  $Q_{mn}$ , give a measure of exciton delocalization between sites  $m$  ( $x$ -axis) and  $n$  ( $y$ -axis). The color scale is given at the bottom.



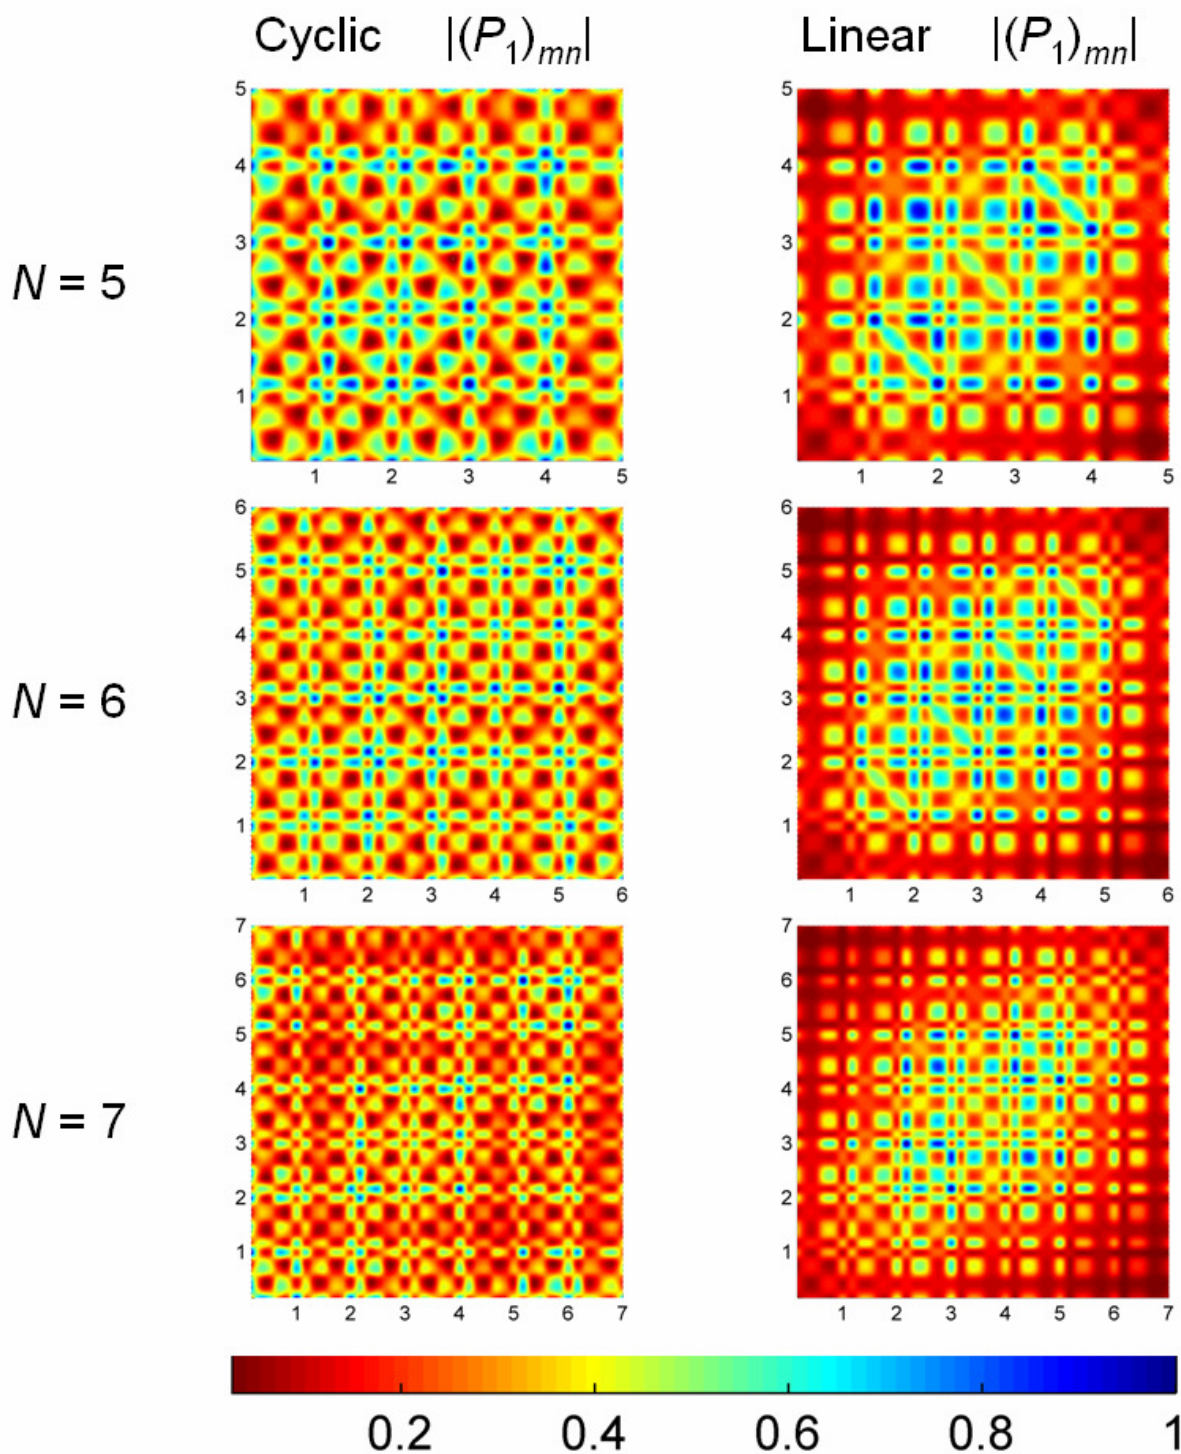

**Figure SI-2.** Contour plots of momentum density matrices ( $\mathbf{P}_1$ ) for the lowest excitation energy ( $S_1 \leftarrow S_0$ ) in the cyclic and linear paraphenylenes. The  $x$ - and  $y$ -axis labels represent the number of benzene repeat units in the molecule. The elements of the momentum matrix,  $P_{mn}$ , represent the probability amplitude of an electron-hole pair oscillation between sites  $m$  ( $x$ -axis) and  $n$  ( $y$ -axis). The color scale is given at the bottom.

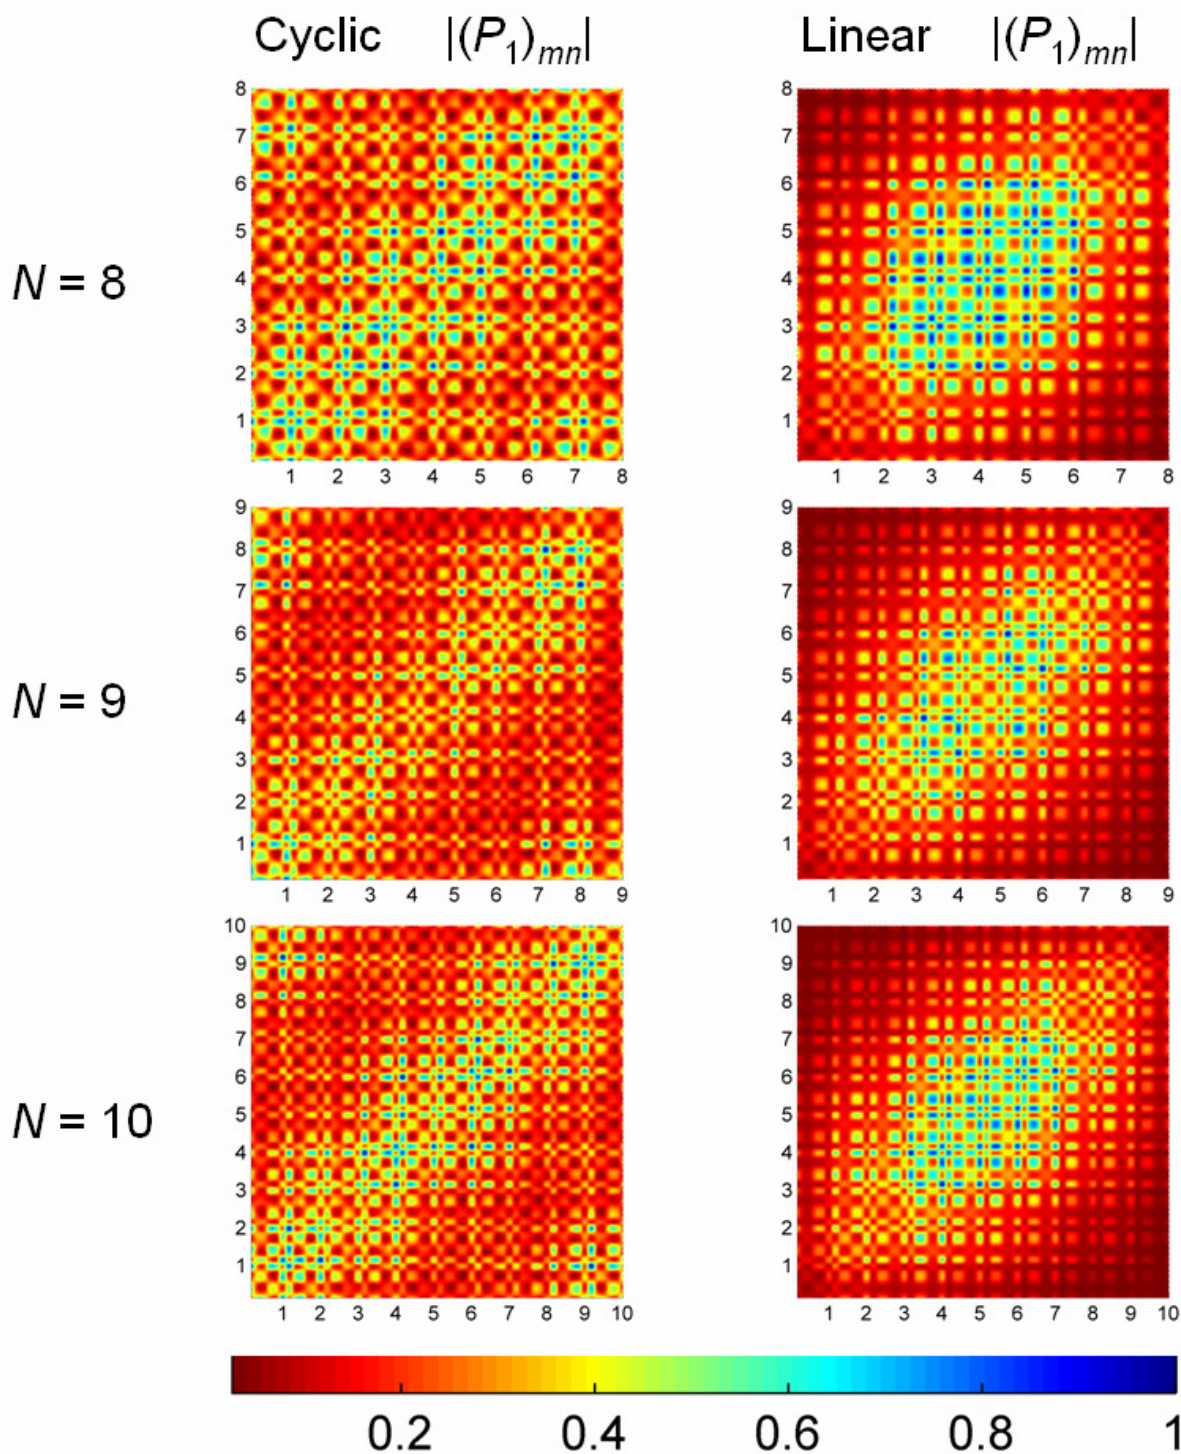

**Figure SI-2 (continued).** Contour plots of momentum density matrices ( $\mathbf{P}_1$ ) for the lowest excitation energy ( $S_1 \leftarrow S_0$ ) in the cyclic and linear paraphenylenes. The  $x$ - and  $y$ -axis labels represent the number of benzene repeat units in the molecule. The elements of the momentum matrix,  $P_{mn}$ , represent the probability amplitude of an electron-hole pair oscillation between sites  $m$  ( $x$ -axis) and  $n$  ( $y$ -axis). The color scale is given at the bottom.

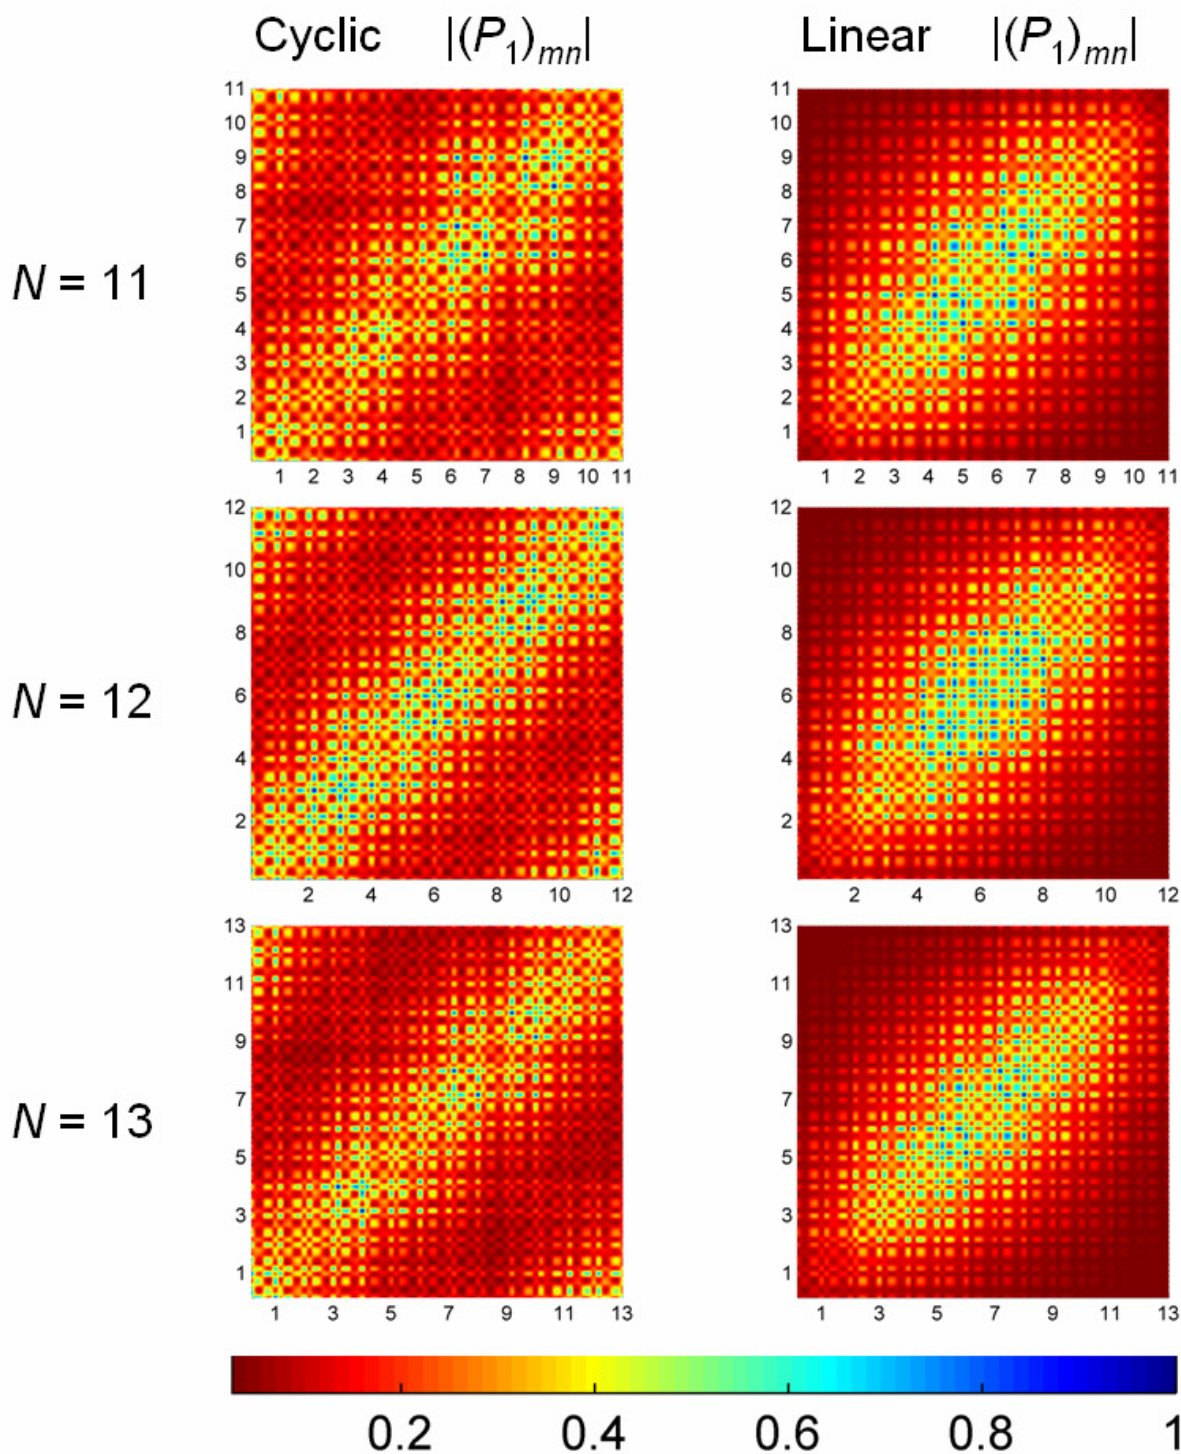

**Figure SI-2 (continued).** Contour plots of momentum density matrices ( $\mathbf{P}_1$ ) for the lowest excitation energy ( $S_1 \leftarrow S_0$ ) in the cyclic and linear paraphenylenes. The x- and y-axis labels represent the number of benzene repeat units in the molecule. The elements of the momentum matrix,  $P_{mn}$ , represent the probability amplitude of an electron-hole pair oscillation between sites  $m$  (x-axis) and  $n$  (y-axis). The color scale is given at the bottom.

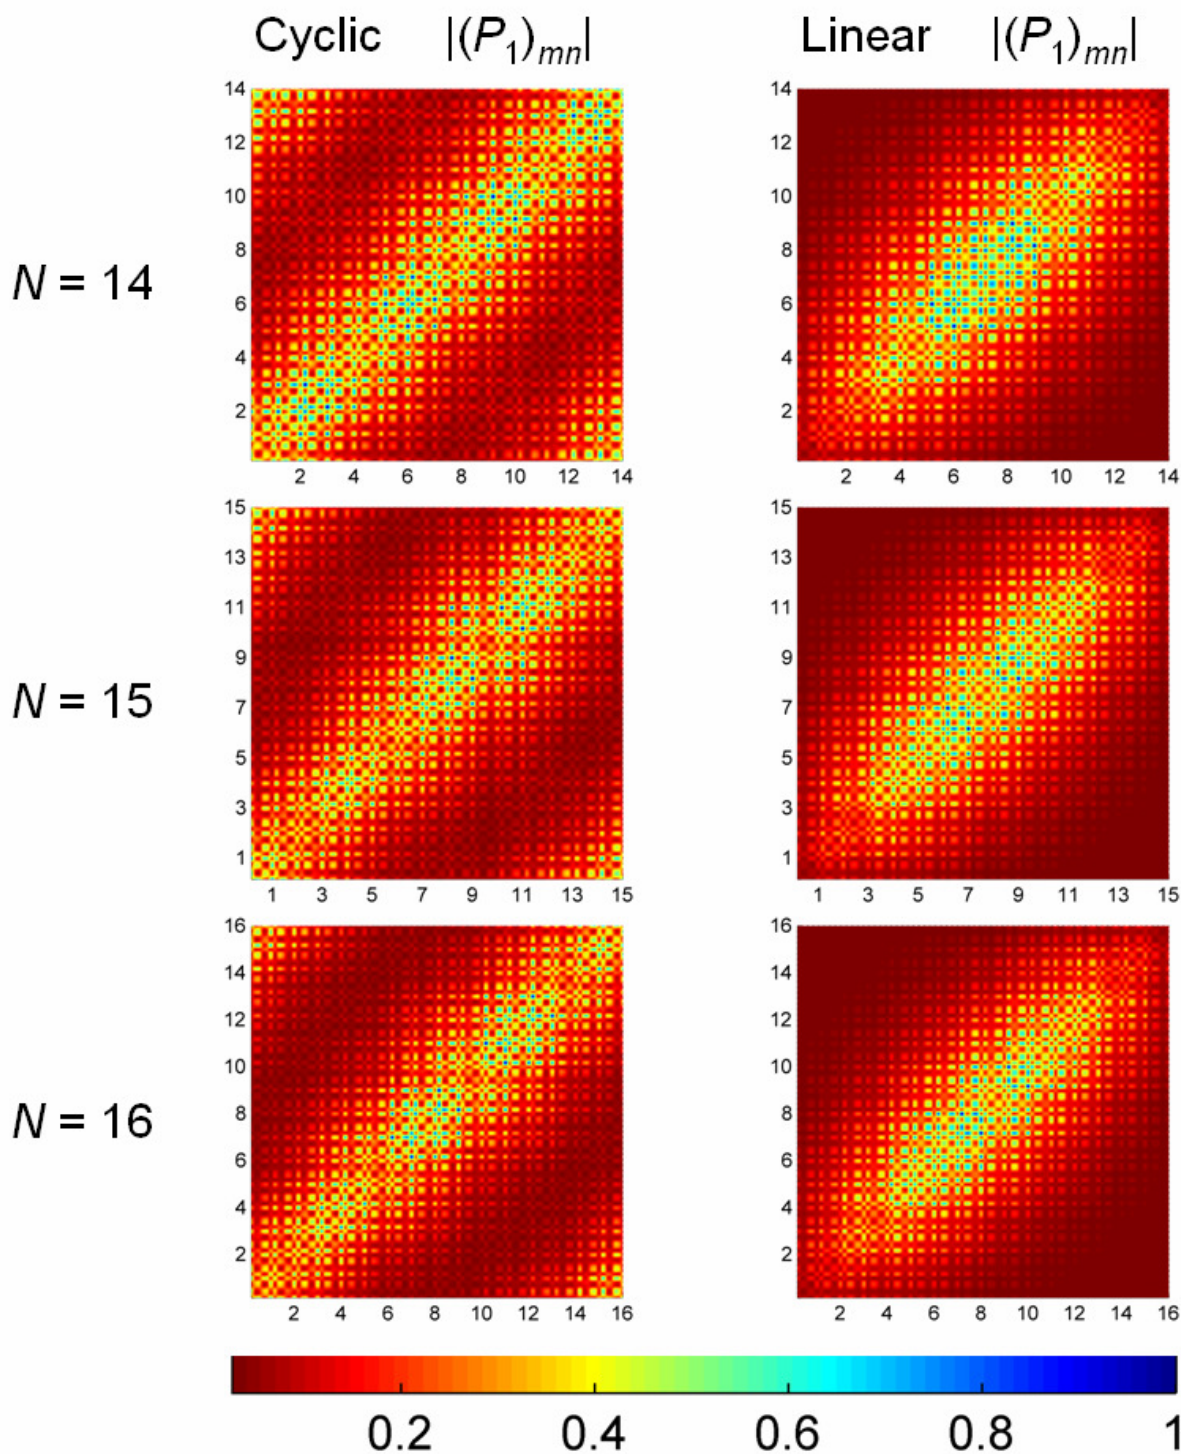

**Figure SI-2 (continued).** Contour plots of momentum density matrices ( $\mathbf{P}_1$ ) for the lowest excitation energy ( $S_1 \leftarrow S_0$ ) in the cyclic and linear paraphenylenes. The x- and y-axis labels represent the number of benzene repeat units in the molecule. The elements of the momentum matrix,  $P_{mn}$ , represent the probability amplitude of an electron-hole pair oscillation between sites  $m$  (x-axis) and  $n$  (y-axis). The color scale is given at the bottom.

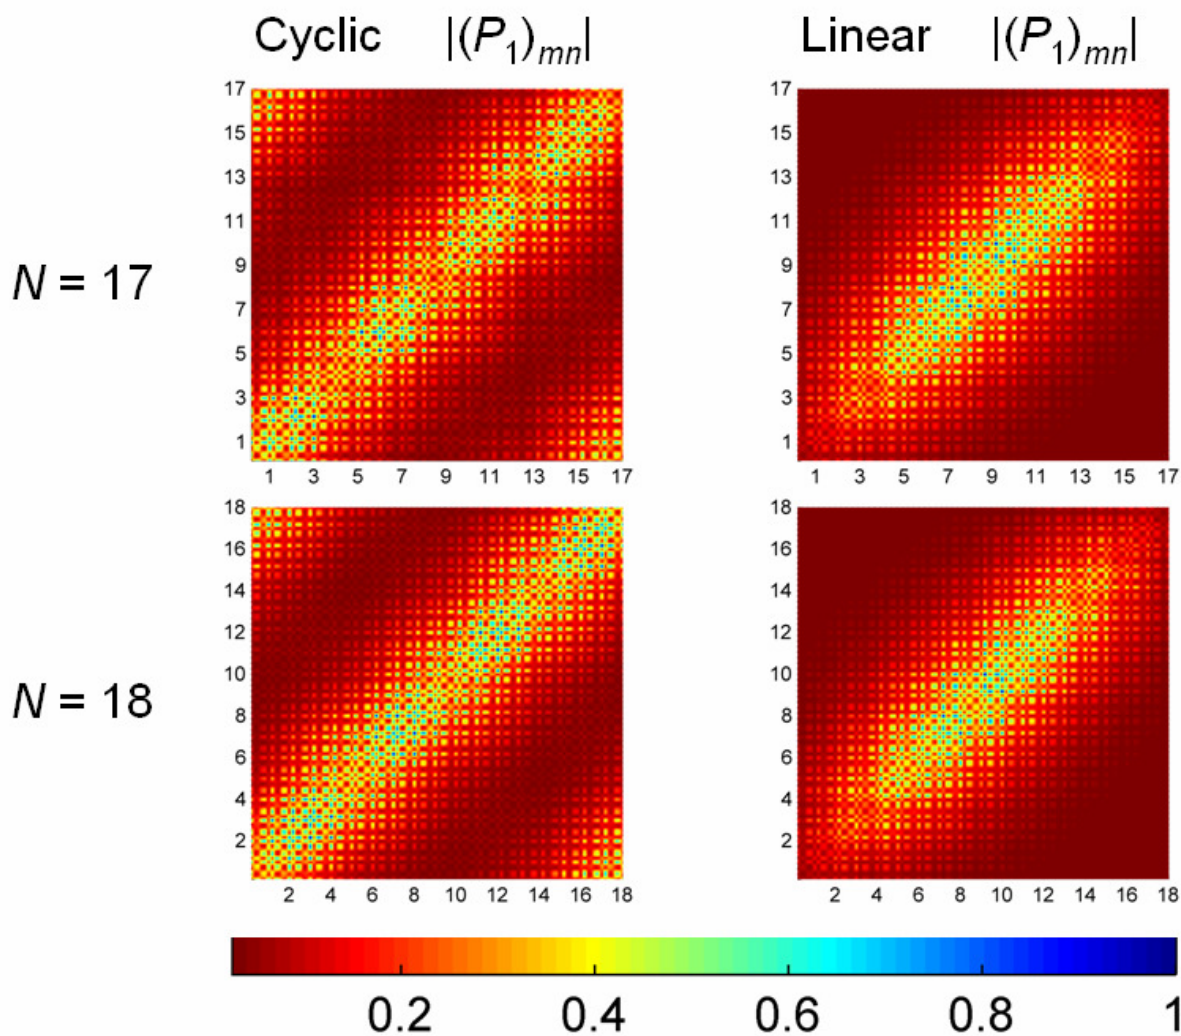

**Figure SI-2 (continued).** Contour plots of momentum density matrices ( $\mathbf{P}_1$ ) for the lowest excitation energy ( $S_1 \leftarrow S_0$ ) in the cyclic and linear paraphenylenes. The  $x$ - and  $y$ -axis labels represent the number of benzene repeat units in the molecule. The elements of the momentum matrix,  $P_{mn}$ , represent the probability amplitude of an electron-hole pair oscillation between sites  $m$  ( $x$ -axis) and  $n$  ( $y$ -axis). The color scale is given at the bottom.

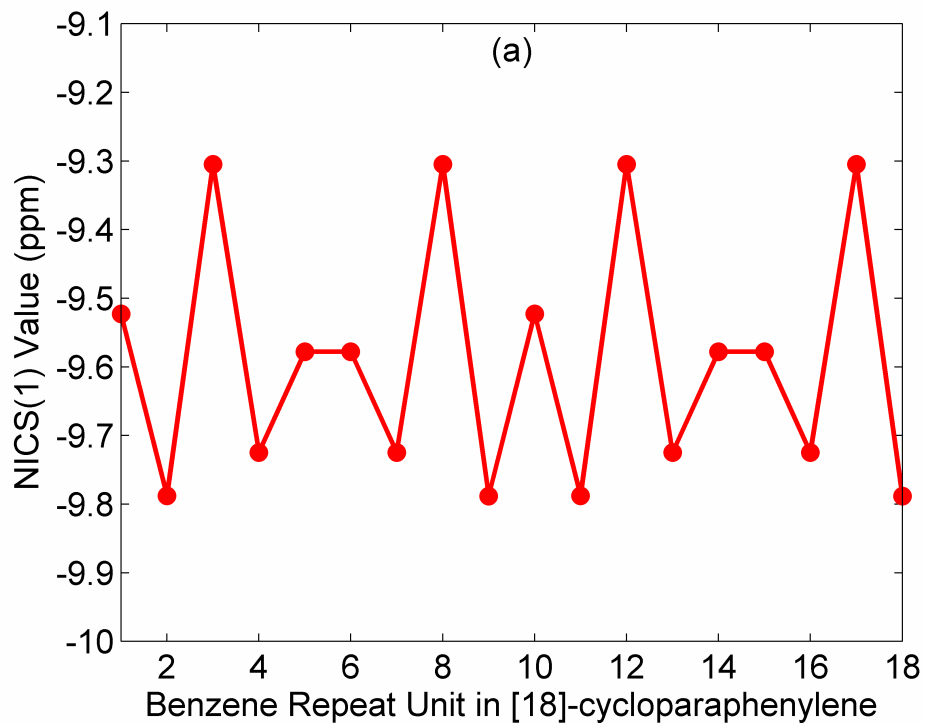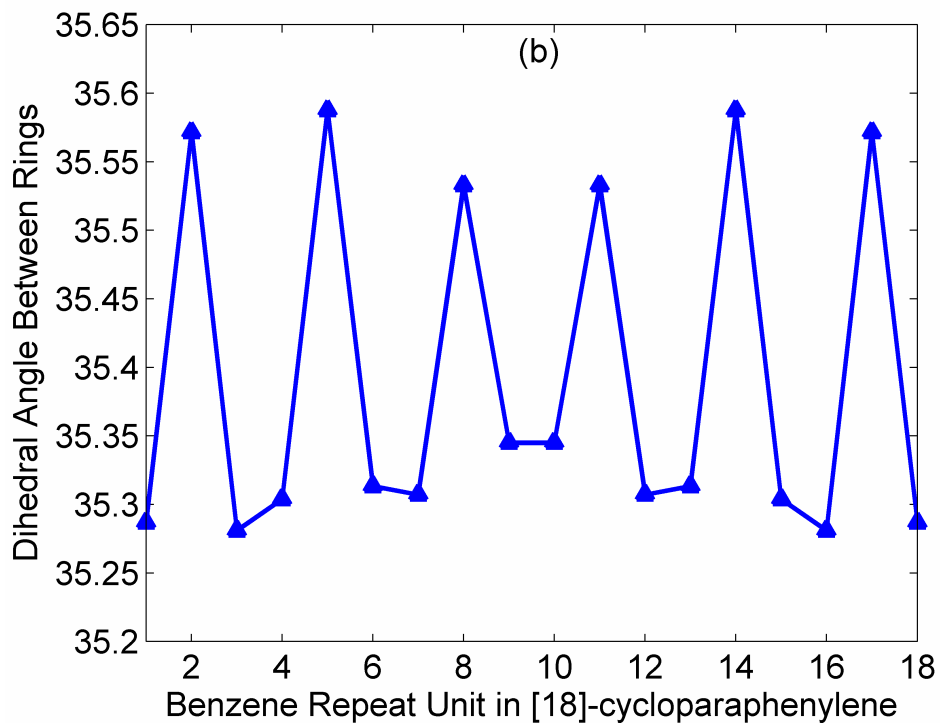

**Figure SI-3.** (a) NICS(1) values of individual benzene rings for the  $N = 18$  cycloparaphenylene and (b) dihedral angle between adjacent benzene rings for the same  $N = 18$  cycloparaphenylene. The NICS(1) values were obtained by computing the absolute magnetic shielding at 1 Å outside each of the benzene rings (i.e., oriented outside the nanoring). The 4 maxima in Figure SI-3(a) are located at the same positions corresponding to maxima in the  $N = 18$  coordinate transition matrix (cf. Figure SI-1).

Cartesian coordinates (in Å) of [5]-cycloparaphenylene optimized at the PBE0/6-31G(d,p) level of theory:

|   |               |               |               |
|---|---------------|---------------|---------------|
| C | -2.3252756395 | -2.6110264855 | -0.1574978962 |
| C | -1.5684445871 | -2.8241165455 | -1.3219029524 |
| C | -1.8279391499 | -3.2324140852 | 1.0041766003  |
| C | -0.2519194994 | -3.2516129261 | -1.2505278401 |
| C | -0.5112700429 | -3.6698896635 | 1.0750241248  |
| C | 0.3641117361  | -3.4968212405 | -0.0130734630 |
| C | 1.7650542363  | -3.0275729786 | 0.1573569431  |
| C | 2.6221858670  | -2.7836906170 | -0.9324253204 |
| C | 2.0594969347  | -2.3220714612 | 1.3343995267  |
| C | 3.4363205994  | -1.6567815219 | -0.9582731692 |
| C | 2.8716318724  | -1.1982974549 | 1.3092847521  |
| C | 3.4246115314  | -0.7360841736 | 0.1052336853  |
| C | 3.4246104722  | 0.7360847193  | -0.1052344405 |
| C | 2.8716290352  | 1.1982985692  | -1.3092842622 |
| C | 3.4363213725  | 1.6567823800  | 0.9582723129  |
| C | 2.0595023672  | 2.3220786822  | -1.3344014924 |
| C | 2.6221883531  | 2.7836927998  | 0.9324257882  |
| C | 1.7650578778  | 3.0275767186  | -0.1573571492 |
| C | 0.3641135092  | 3.4968188214  | 0.0130739510  |
| C | -0.5112690508 | 3.6698903078  | -1.0750223776 |
| C | -0.2519174543 | 3.2516079239  | 1.2505278246  |
| C | -1.8279386262 | 3.2324155954  | -1.0041754807 |
| C | -1.5684428200 | 2.8241129135  | 1.3219037569  |
| C | -2.3252739757 | 2.6110257482  | 0.1574981650  |
| C | -3.2088952054 | 1.4153892532  | 0.0903830273  |
| C | -3.4133015137 | 0.7663264447  | -1.1402161224 |
| C | -3.4309527508 | 0.6181085434  | 1.2277537327  |
| C | -3.4309510064 | -0.6181093836 | -1.2277550481 |
| C | -3.4133015922 | -0.7663271384 | 1.1402153922  |
| C | -3.2088985590 | -1.4153909364 | -0.0903839831 |
| H | -1.9229145308 | -2.4580914305 | -2.2794826576 |
| H | 0.3530151037  | -3.1823726587 | -2.1493415773 |
| H | -0.1280731748 | -4.0043052759 | 2.0355647129  |
| H | -2.4187624963 | -3.2396325940 | 1.9157813608  |
| H | 2.5488040049  | -3.3908986685 | -1.8309710549 |
| H | 3.9683900691  | -1.4187313486 | -1.8759299156 |
| H | 2.8802077016  | -0.5589481649 | 2.1864210822  |
| H | 1.4773686977  | -2.5053167216 | 2.2318960724  |
| H | 2.8802083463  | 0.5589516781  | -2.1864221798 |
| H | 1.4773677981  | 2.5053185219  | -2.2318952754 |
| H | 2.5488046414  | 3.3908984563  | 1.8309729244  |
| H | 3.9683913131  | 1.4187319135  | 1.8759287209  |
| H | -0.1280729316 | 4.0043102794  | -2.0355617819 |
| H | -2.4187608633 | 3.2396329126  | -1.9157809130 |
| H | -1.9229105624 | 2.4580828536  | 2.2794822772  |
| H | 0.3530169390  | 3.1823707512  | 2.1493418645  |
| H | -3.3787768131 | 1.3303714188  | -2.0671985475 |
| H | -3.4389830688 | -1.0631729505 | -2.2180134812 |
| H | -3.3787825911 | -1.3303732271 | 2.0671972541  |
| H | -3.4389826481 | 1.0631714462  | 2.2180125290  |

Cartesian coordinates (in Å) of [6]-cycloparaphenylene optimized at the PBE0/6-31G(d,p) level of theory:

|   |               |               |               |
|---|---------------|---------------|---------------|
| C | -2.7107954474 | 3.1896279164  | -0.0174436438 |
| C | -3.4442286181 | 2.6715502356  | -1.0984711314 |
| C | -3.0019848797 | 2.6364498166  | 1.2387990999  |
| C | -4.1355799236 | 1.4738159388  | -0.9836721919 |
| C | -3.7109440695 | 1.4509541000  | 1.3550115456  |
| C | -4.1399492597 | 0.7435941396  | 0.2190983963  |
| C | -4.1399476869 | -0.7435930756 | 0.2190983848  |
| C | -4.1355787418 | -1.4738150590 | -0.9836719719 |
| C | -3.7109423456 | -1.4509539444 | 1.3550109775  |
| C | -3.4442293296 | -2.6715504495 | -1.0984713330 |
| C | -3.0019850891 | -2.6364508853 | 1.2387990695  |
| C | -2.7107951885 | -3.1896274654 | -0.0174441964 |
| C | -1.4197171332 | -3.8947895196 | -0.2032129360 |
| C | -0.6926137677 | -3.6254720286 | -1.3723909311 |
| C | -0.6946559482 | -4.4597637119 | 0.8611190840  |
| C | 0.6926050958  | -3.6255083352 | -1.3724218937 |
| C | 0.6946859977  | -4.4597963233 | 0.8610920185  |
| C | 1.4197265833  | -3.8948094092 | -0.2032453769 |
| C | 2.7106934939  | -3.1894684057 | -0.0174899735 |
| C | 3.4443212692  | -2.6715990395 | -1.0984821362 |
| C | 3.0021598768  | -2.6365473484 | 1.2387947427  |
| C | 4.1354815292  | -1.4737493166 | -0.9837319687 |
| C | 3.7108808240  | -1.4509043762 | 1.3549671269  |
| C | 4.1400784882  | -0.7436055016 | 0.2190876424  |
| C | 4.1400774071  | 0.7436047265  | 0.2190876080  |
| C | 4.1354800663  | 1.4737483747  | -0.9837319767 |
| C | 3.7108797612  | 1.4509046851  | 1.3549665129  |
| C | 3.4443222406  | 2.6715994851  | -1.0984826602 |
| C | 3.0021607658  | 2.6365488849  | 1.2387948129  |
| C | 2.7106942937  | 3.1894685629  | -0.0174904614 |
| C | 1.4197274150  | 3.8948097011  | -0.2032453021 |
| C | 0.6926052147  | 3.6255074809  | -1.3724211338 |
| C | 0.6946859634  | 4.4597956850  | 0.8610922136  |
| C | -0.6926136254 | 3.6254714512  | -1.3723908127 |
| C | -0.6946560129 | 4.4597637483  | 0.8611193527  |
| C | -1.4197166182 | 3.8947887686  | -0.2032124489 |
| H | -3.3688740523 | 3.1357380225  | -2.0780367883 |
| H | -4.5586205085 | 1.0433975564  | -1.8860680027 |
| H | -3.7744398040 | 0.9997777695  | 2.3392545246  |
| H | -2.5215879021 | 3.0333956100  | 2.1278936909  |
| H | -4.5586202798 | -1.0433974849 | -1.8860677843 |
| H | -3.3688735496 | -3.1357374482 | -2.0780371145 |
| H | -2.5215866814 | -3.0333954291 | 2.1278934680  |
| H | -3.7744391446 | -0.9997780348 | 2.3392539989  |
| H | -1.2017666325 | -3.2237800222 | -2.2423525342 |
| H | 1.2017341802  | -3.2237284227 | -2.2423585993 |
| H | 1.2154556876  | -4.8020030063 | 1.7515966933  |
| H | -1.2154141631 | -4.8020371663 | 1.7516048817  |
| H | 3.3687582484  | -3.1356396411 | -2.0781014735 |
| H | 4.5585230740  | -1.0433334577 | -1.8861275559 |
| H | 3.7746182100  | -0.9998445550 | 2.3392461098  |
| H | 2.5217004413  | -3.0334458881 | 2.1278777269  |
| H | 4.5585231619  | 1.0433333858  | -1.8861273134 |
| H | 3.3687579627  | 3.1356390709  | -2.0781022906 |
| H | 2.5217002899  | 3.0334463410  | 2.1278778165  |
| H | 3.7746181759  | 0.9998451720  | 2.3392455127  |
| H | 1.2017338685  | 3.2237274915  | -2.2423581391 |
| H | -1.2017669480 | 3.2237799711  | -2.2423522927 |
| H | -1.2154142778 | 4.8020369142  | 1.7516052761  |
| H | 1.2154557480  | 4.8020037452  | 1.7515962068  |



Cartesian coordinates (in Å) of [7]-cycloparaphenylene optimized at the PBE0/6-31G(d,p) level of theory:

|   |               |               |               |
|---|---------------|---------------|---------------|
| C | 3.9922847356  | -2.7178098336 | 0.3197766572  |
| C | 3.1880259395  | -2.9224778730 | 1.4509293423  |
| C | 3.8019735101  | -3.6170644578 | -0.7442092070 |
| C | 2.1025822183  | -3.7797810664 | 1.4220400654  |
| C | 2.7113932248  | -4.4786632417 | -0.7738179899 |
| C | 1.7591649162  | -4.4855190144 | 0.2594156318  |
| C | 0.3375767564  | -4.8493966265 | 0.0595249780  |
| C | -0.5620085307 | -4.9220590779 | 1.1353389548  |
| C | -0.2364199288 | -4.7561540592 | -1.2180178431 |
| C | -1.8999086585 | -4.5964847023 | 0.9715806317  |
| C | -1.5830690981 | -4.4676388860 | -1.3841649300 |
| C | -2.4141752933 | -4.2175898430 | -0.2796179072 |
| C | -3.5547063121 | -3.2719891717 | -0.3642597759 |
| C | -4.3481521982 | -2.9452392356 | 0.7501428550  |
| C | -3.6397373740 | -2.3994895889 | -1.4602765778 |
| C | -4.9504179188 | -1.6990649005 | 0.8656888684  |
| C | -4.2488058543 | -1.1596659566 | -1.3508996546 |
| C | -4.7998684666 | -0.7274953260 | -0.1365509144 |
| C | -4.7998638495 | 0.7274940664  | 0.1365509734  |
| C | -4.2488204491 | 1.1596721798  | 1.3509055835  |
| C | -4.9504320907 | 1.6990683334  | -0.8656815841 |
| C | -3.6397292267 | 2.3994856945  | 1.4602741637  |
| C | -4.3481418363 | 2.9452322660  | -0.7501497126 |
| C | -3.5547090825 | 3.2719895754  | 0.3642600786  |
| C | -2.4141696341 | 4.2175779731  | 0.2796152523  |
| C | -1.5830789048 | 4.4676656401  | 1.3841651765  |
| C | -1.8999190300 | 4.5965149805  | -0.9715764243 |
| C | -0.2364178255 | 4.7561261614  | 1.2180173896  |
| C | -0.5620062677 | 4.9220322841  | -1.1353445240 |
| C | 0.3375746131  | 4.8494105097  | -0.0595247881 |
| C | 1.7591467735  | 4.4854746623  | -0.2593974312 |
| C | 2.7114186780  | 4.4787046139  | 0.7737947045  |
| C | 2.1026475869  | 3.7798835033  | -1.4220856957 |
| C | 3.8019377732  | 3.6170269881  | 0.7442330899  |
| C | 3.1879368500  | 2.9223827398  | -1.4508781861 |
| C | 3.9923242823  | 2.7178352483  | -0.3197949621 |
| C | 4.6748087911  | 1.4101560096  | -0.1719584315 |
| C | 4.8232760580  | 0.8318228837  | 1.0988661532  |
| C | 4.8454751766  | 0.5447056516  | -1.2653886088 |
| C | 4.8454884928  | -0.5447069188 | 1.2653886922  |
| C | 4.8232992986  | -0.8318243599 | -1.0988667173 |
| C | 4.6747898214  | -1.4101471127 | 0.1719572164  |
| H | 3.3009227704  | -2.2809377319 | 2.3179587515  |
| H | 1.4214918713  | -3.7639065036 | 2.2660991194  |
| H | 2.5541724284  | -5.0886489766 | -1.6593811269 |
| H | 4.4597650513  | -3.5852556543 | -1.6084171906 |
| H | -0.1948095413 | -5.1133894958 | 2.1394458426  |
| H | -2.5145815986 | -4.5070637752 | 1.8616691435  |
| H | -1.9512886316 | -4.3077615263 | -2.3927803024 |
| H | 0.3999883680  | -4.7620745431 | -2.0978484560 |
| H | -4.4157177395 | -3.6312086470 | 1.5894281729  |
| H | -5.4631208340 | -1.4444935310 | 1.7897268954  |
| H | -4.1375807846 | -0.4532313946 | -2.1679774433 |
| H | -3.0829861073 | -2.6093572599 | -2.3669374675 |
| H | -4.1375765439 | 0.4532325428  | 2.1679770809  |
| H | -3.0829853591 | 2.6093595446  | 2.3669377231  |
| H | -4.4157187972 | 3.6312085830  | -1.5894281279 |
| H | -5.4631177439 | 1.4444917411  | -1.7897279209 |
| H | -1.9512888251 | 4.3077610855  | 2.3927798193  |
| H | 0.3999878388  | 4.7620838767  | 2.0978490461  |
| H | -0.1948095266 | 5.1133903989  | -2.1394463351 |
| H | -2.5145791675 | 4.5070553344  | -1.8616708054 |
| H | 2.5541699238  | 5.0886488606  | 1.6593816766  |
| H | 4.4597666680  | 3.5852609232  | 1.6084141714  |
| H | 3.3009395678  | 2.2809544787  | -2.3179727719 |
| H | 1.4214803925  | 3.7638848530  | -2.2660847534 |
| H | 4.7776101702  | 1.4557719982  | 1.9863352759  |
| H | 4.8647270724  | -0.9415969533 | 2.2759658701  |
| H | 4.7776074233  | -1.4557741570 | -1.9863343150 |

H 4.8647253187 0.9415952166 -2.2759661651

Cartesian coordinates (in Å) of [8]-cycloparaphenylene optimized at the PBE0/6-31G(d,p) level of theory:

|   |               |               |               |
|---|---------------|---------------|---------------|
| C | 2.7825082730  | 4.7885678316  | -0.0562048106 |
| C | 3.6248881179  | 4.6066362510  | 1.0524034279  |
| C | 3.1229649741  | 4.1032531481  | -1.2307739980 |
| C | 4.6070896747  | 3.6248711765  | 1.0522565181  |
| C | 4.1036824179  | 3.1231113411  | -1.2309386155 |
| C | 4.7888234368  | 2.7824384738  | -0.0563411554 |
| C | 5.3539281341  | 1.4183200379  | 0.0560908480  |
| C | 5.1107518266  | 0.6932591475  | 1.2308168143  |
| C | 5.8213210229  | 0.6943650184  | -1.0525593236 |
| C | 5.1107502928  | -0.6932591856 | 1.2308161167  |
| C | 5.8213206074  | -0.6943659807 | -1.0525587359 |
| C | 5.3539261234  | -1.4183192582 | 0.0560906423  |
| C | 4.7888225211  | -2.7824373577 | -0.0563413733 |
| C | 4.6070884764  | -3.6248687530 | 1.0522561695  |
| C | 4.1036791779  | -3.1231086800 | -1.2309369061 |
| C | 3.6248902085  | -4.6066370775 | 1.0524034426  |
| C | 3.1229672528  | -4.1032560004 | -1.2307756034 |
| C | 2.7825089867  | -4.7885688040 | -0.0562047743 |
| C | 1.4183003915  | -5.3534699237 | 0.0563482163  |
| C | 0.6932188248  | -5.1103385219 | 1.2310739423  |
| C | 0.6943623936  | -5.8209757664 | -1.0522643056 |
| C | -0.6933084908 | -5.1103409403 | 1.2310447053  |
| C | -0.6943625082 | -5.8210333716 | -1.0522827214 |
| C | -1.4183623993 | -5.3536147654 | 0.0563261663  |
| C | -2.7825979775 | -4.7887691707 | -0.0562218117 |
| C | -3.6249299142 | -4.6067717992 | 1.0524143244  |
| C | -3.1232428638 | -4.1036564625 | -1.2308554919 |
| C | -4.6069612615 | -3.6248428237 | 1.0523348757  |
| C | -4.1037346072 | -3.1232864295 | -1.2309355175 |
| C | -4.7888448458 | -2.7825344557 | -0.0563372290 |
| C | -5.3537855696 | -1.4183391874 | 0.0561044201  |
| C | -5.1106414680 | -0.6932606507 | 1.2308311142  |
| C | -5.8210965273 | -0.6943624891 | -1.0525673590 |
| C | -5.1106397313 | 0.6932606739  | 1.2308304054  |
| C | -5.8210960585 | 0.6943634030  | -1.0525668428 |
| C | -5.3537837776 | 1.4183385202  | 0.0561042659  |
| C | -4.7888441059 | 2.7825335630  | -0.0563374358 |
| C | -4.6069599317 | 3.6248404051  | 1.0523347695  |
| C | -4.1037311443 | 3.1232836876  | -1.2309337531 |
| C | -3.6249322702 | 4.6067730661  | 1.0524144351  |
| C | -3.1232458022 | 4.1036601278  | -1.2308573804 |
| C | -2.7825989033 | 4.7887699680  | -0.0562216728 |
| C | -1.4183628318 | 5.3536157728  | 0.0563260441  |
| C | -0.6933085591 | 5.1103441547  | 1.2310458408  |
| C | -0.6943616787 | 5.8210346489  | -1.0522830396 |
| C | 0.6932187567  | 5.1103348306  | 1.2310723856  |
| C | 0.6943632460  | 5.8209740779  | -1.0522642337 |
| C | 1.4183001745  | 5.3534687380  | 0.0563480339  |
| H | 3.4567834353  | 5.1865015864  | 1.9561648978  |
| H | 5.1869226585  | 3.4566751760  | 1.9560224185  |
| H | 4.2227936528  | 2.5062343419  | -2.1165684333 |
| H | 2.5062415565  | 4.2226008767  | -2.1164696335 |
| H | 4.7592441671  | 1.2136912814  | 2.1165391472  |
| H | 4.7592444454  | -1.2136901483 | 2.1165394129  |
| H | 6.1127240590  | -1.2233969088 | -1.9561420525 |
| H | 6.1127246408  | 1.2233971094  | -1.9561422185 |
| H | 5.1869223455  | -3.4566753875 | 1.9560216456  |
| H | 3.4567834533  | -5.1865019430 | 1.9561651073  |
| H | 2.5062402466  | -4.2226015301 | -2.1164694980 |
| H | 4.2227928821  | -2.5062355602 | -2.1165685374 |
| H | 1.2136017284  | -4.7586673432 | 2.1167684301  |
| H | -1.2137416647 | -4.7587992630 | 2.1167566272  |
| H | -1.2233589035 | -6.1126165018 | -1.9558253064 |
| H | 1.2234180751  | -6.1124633717 | -1.9558042970 |
| H | -3.4567672690 | -5.1865483585 | 1.9562217106  |
| H | -5.1867592829 | -3.4566031145 | 1.9561139357  |
| H | -4.2229961347 | -2.5065964258 | -2.1166724955 |
| H | -2.5065579003 | -4.2230093159 | -2.1165817962 |
| H | -4.7591698668 | -1.2136729232 | 2.1165819587  |

|   |               |               |               |
|---|---------------|---------------|---------------|
| H | -4.7591700967 | 1.2136718675  | 2.1165822515  |
| H | -6.1125068482 | 1.2233842704  | -1.9561520036 |
| H | -6.1125074361 | -1.2233844301 | -1.9561521242 |
| H | -5.1867590352 | 3.4566031818  | 1.9561132860  |
| H | -3.4567670719 | 5.1865484549  | 1.9562224346  |
| H | -2.5065567626 | 4.2230101353  | -2.1165817635 |
| H | -4.2229953935 | 2.5065976157  | -2.1166725659 |
| H | -1.2137426432 | 4.7587982299  | 2.1167560065  |
| H | 1.2136006361  | 4.7586680284  | 2.1167687209  |
| H | 1.2234178850  | 6.1124629599  | -1.9558040663 |
| H | -1.2233591276 | 6.1126172013  | -1.9558254820 |

Cartesian coordinates (in Å) of [9]-cycloparaphenylene optimized at the PBE0/6-31G(d,p) level of theory:

|   |               |               |               |
|---|---------------|---------------|---------------|
| C | 2.7971078063  | 5.5083594885  | 0.2331475514  |
| C | 3.1451589013  | 4.7316989455  | 1.3480950539  |
| C | 3.6978634443  | 5.5043128071  | -0.8445215621 |
| C | 4.2210793176  | 3.8603574525  | 1.3130487378  |
| C | 4.7680673008  | 4.6189825316  | -0.8875160165 |
| C | 4.9970086424  | 3.7101700211  | 0.1561799889  |
| C | 5.7540085880  | 2.4492763744  | -0.0055610005 |
| C | 6.3443687454  | 1.7820678739  | 1.0786286155  |
| C | 5.6161908506  | 1.7322822320  | -1.2011289228 |
| C | 6.5883656924  | 0.4164772535  | 1.0303992696  |
| C | 5.8540221798  | 0.3659275803  | -1.2467747786 |
| C | 6.2450191684  | -0.3404540525 | -0.1008771698 |
| C | 5.9761711463  | -1.7940413144 | -0.0294609724 |
| C | 5.4135982532  | -2.3110050677 | 1.1458072227  |
| C | 5.9727095893  | -2.6275733933 | -1.1587114833 |
| C | 4.7113429256  | -3.5060180009 | 1.1416697522  |
| C | 5.2690016104  | -3.8249085164 | -1.1628962921 |
| C | 4.5387158478  | -4.2410953651 | -0.0390078683 |
| C | 3.4032128435  | -5.1856654608 | -0.1247852373 |
| C | 2.9057557550  | -5.8742610309 | 0.9926774064  |
| C | 2.6035185133  | -5.1761821219 | -1.2759427129 |
| C | 1.5999278972  | -6.3455087833 | 1.0216690261  |
| C | 1.3003706616  | -5.6491147404 | -1.2480233151 |
| C | 0.7365824253  | -6.1516663525 | -0.0675835406 |
| C | -0.7367291327 | -6.1518381729 | 0.0676182441  |
| C | -1.3005116072 | -5.6491137358 | 1.2480070308  |
| C | -1.6000832994 | -6.3454643620 | -1.0216506144 |
| C | -2.6036312869 | -5.1761002511 | 1.2759348960  |
| C | -2.9058575083 | -5.8741097313 | -0.9927330338 |
| C | -3.4033818362 | -5.1856932921 | 0.1248144024  |
| C | -4.5387965276 | -4.2410116110 | 0.0389743524  |
| C | -5.2690641477 | -3.8247869971 | 1.1628667428  |
| C | -4.7114265276 | -3.5058888029 | -1.1416634648 |
| C | -5.9727405117 | -2.6274254743 | 1.1587396616  |
| C | -5.4135778409 | -2.3108208423 | -1.1458128507 |
| C | -5.9761685391 | -1.7939150832 | 0.0294663982  |
| C | -6.2451184492 | -0.3403490756 | 0.1008913835  |
| C | -5.8540196936 | 0.3660659961  | 1.2467332634  |
| C | -6.5884437277 | 0.4166477414  | -1.0303410404 |
| C | -5.6159502182 | 1.7323732611  | 1.2010875810  |
| C | -6.3443148193 | 1.7822110799  | -1.0786805032 |
| C | -5.7539775943 | 2.4493828715  | 0.0055610717  |
| C | -4.9970944247 | 3.7103496294  | -0.1562397471 |
| C | -4.7679994802 | 4.6191179232  | 0.8874619657  |
| C | -4.2209713701 | 3.8604238045  | -1.3129953350 |
| C | -3.6977271327 | 5.5043725033  | 0.8445720554  |
| C | -3.1449781971 | 4.7316679078  | -1.3480744696 |
| C | -2.7969519400 | 5.5082684057  | -0.2330882270 |
| C | -1.4172503648 | 6.0354692576  | -0.1250052108 |
| C | -0.7943660511 | 6.1445200067  | 1.1277357292  |
| C | -0.5866188483 | 6.1638005994  | -1.2487084522 |
| C | 0.5867485945  | 6.1636743870  | 1.2487547539  |
| C | 0.7945013864  | 6.1445834749  | -1.1277697327 |
| C | 1.4172876284  | 6.0352345730  | 0.1249894483  |
| H | 2.4886250007  | 4.6986709227  | 2.2110006841  |
| H | 4.3708476437  | 3.1789581202  | 2.1451356501  |
| H | 5.3978684891  | 4.5911245662  | -1.7729335804 |
| H | 3.5229363685  | 6.1550417502  | -1.6966124332 |
| H | 6.5477839402  | 2.3270525716  | 1.9967329799  |
| H | 6.9842533380  | -0.0820089409 | 1.9112245942  |
| H | 5.5870090767  | -0.1808566597 | -2.1462292475 |
| H | 5.1717340535  | 2.2181948046  | -2.0649877267 |
| H | 5.3977440613  | -1.7002669031 | 2.0434039901  |
| H | 4.1673990372  | -3.7952780106 | 2.0358345326  |
| H | 5.2325628876  | -4.4141759069 | -2.0753752681 |
| H | 6.4724847451  | -2.3041883026 | -2.0680327289 |
| H | 3.5275664279  | -5.9817988315 | 1.8775695152  |
| H | 1.2243457860  | -6.8115678309 | 1.9288615796  |
| H | 0.6665890992  | -5.4886772407 | -2.1151882667 |

|   |               |               |               |
|---|---------------|---------------|---------------|
| H | 2.9517440322  | -4.6583416000 | -2.1646926516 |
| H | -0.6667314459 | -5.4886347978 | 2.1151775240  |
| H | -2.9518494024 | -4.6582455678 | 2.1646727997  |
| H | -3.5277045022 | -5.9817295537 | -1.8775792044 |
| H | -1.2244951510 | -6.8115439567 | -1.9288481513 |
| H | -5.2326747549 | -4.4140725606 | 2.0753493145  |
| H | -6.4725636221 | -2.3040646605 | 2.0680247226  |
| H | -5.3978036210 | -1.7001161039 | -2.0434159862 |
| H | -4.1674899478 | -3.7951660286 | -2.0358427643 |
| H | -5.5870470918 | -0.1807099644 | 2.1462301650  |
| H | -5.1717414448 | 2.2183563117  | 2.0650036112  |
| H | -6.5477554010 | 2.3271911139  | -1.9967552706 |
| H | -6.9842448729 | -0.0818493806 | -1.9112262984 |
| H | -5.3977571369 | 4.5912189978  | 1.7729305286  |
| H | -3.5228221366 | 6.1551258332  | 1.6966228098  |
| H | -2.4885322987 | 4.6987710408  | -2.2110254336 |
| H | -4.3707929284 | 3.1790854851  | -2.1451462580 |
| H | -1.3910439078 | 6.0991215467  | 2.0336621088  |
| H | 1.0204807645  | 6.1820882166  | 2.2440865026  |
| H | 1.3911840385  | 6.0990608065  | -2.0336564059 |
| H | -1.0203272521 | 6.1820130687  | -2.2440795031 |

Cartesian coordinates (in Å) of [10]-cycloparaphenylene optimized at the PBE0/6-31G(d,p) level of theory:

|   |               |               |               |
|---|---------------|---------------|---------------|
| C | -6.8663661513 | -0.7405391632 | -0.2628380098 |
| C | -6.4686333175 | -1.4658437088 | -1.3968665480 |
| C | -7.0124021784 | -1.4802917539 | 0.9226685514  |
| C | -6.0416062690 | -2.7812548940 | -1.3053996788 |
| C | -6.5933873912 | -2.7997986025 | 1.0148281617  |
| C | -6.0004724182 | -3.4516051702 | -0.0758792843 |
| C | -5.1218466055 | -4.6297952820 | 0.0816251139  |
| C | -4.8141751966 | -5.4967809949 | -0.9784611532 |
| C | -4.3532821853 | -4.7478514469 | 1.2478438117  |
| C | -3.6873404239 | -6.3074307808 | -0.9387428768 |
| C | -3.2308117046 | -5.5599092887 | 1.2891237871  |
| C | -2.8216999753 | -6.2899620759 | 0.1651411905  |
| C | -1.4194054633 | -6.7548566625 | 0.0939260361  |
| C | -0.6951542027 | -6.5490848482 | -1.0877869224 |
| C | -0.6957440766 | -7.1418428437 | 1.2320597570  |
| C | 0.6920045446  | -6.5492805122 | -1.0877392837 |
| C | 0.6922977278  | -7.1421016698 | 1.2320597763  |
| C | 1.4161083637  | -6.7550667242 | 0.0940576144  |
| C | 2.8187486620  | -6.2913071855 | 0.1651709795  |
| C | 3.6843934643  | -6.3093256825 | -0.9386863569 |
| C | 3.2282814436  | -5.5615605020 | 1.2891956882  |
| C | 4.8114677355  | -5.4989987441 | -0.9785225318 |
| C | 4.3509697815  | -4.7498231277 | 1.2477824340  |
| C | 5.1196816257  | -4.6322613844 | 0.0816088479  |
| C | 5.9989868027  | -3.4545658437 | -0.0759034355 |
| C | 6.0402904605  | -2.7841538319 | -1.3053835552 |
| C | 6.5920497392  | -2.8029590969 | 1.0148521400  |
| C | 6.4680156680  | -1.4689663046 | -1.3968651280 |
| C | 7.0116988161  | -1.4836524229 | 0.9226715277  |
| C | 6.8657647050  | -0.7437821277 | -0.2627693447 |
| C | 6.8665743059  | 0.7405777548  | -0.2629020416 |
| C | 6.4686561388  | 1.4658215993  | -1.3969097927 |
| C | 7.0126664693  | 1.4803467101  | 0.9225881036  |
| C | 6.0414408601  | 2.7811590911  | -1.3053968047 |
| C | 6.5933926855  | 2.7997747677  | 1.0147852132  |
| C | 6.0002652438  | 3.4514805377  | -0.0758626413 |
| C | 5.1217870823  | 4.6297693502  | 0.0816340172  |
| C | 4.8142596188  | 5.4968527327  | -0.9784233442 |
| C | 4.3533218169  | 4.7479595647  | 1.2478883622  |
| C | 3.6873067262  | 6.3073413080  | -0.9387996680 |
| C | 3.2307294482  | 5.5598495691  | 1.2890674613  |
| C | 2.8217150956  | 6.2900317535  | 0.1651157528  |
| C | 1.4193932878  | 6.7548467214  | 0.0939155889  |
| C | 0.6951491195  | 6.5491450250  | -1.0877979878 |
| C | 0.6957560361  | 7.1419424263  | 1.2320409046  |
| C | -0.6919990023 | 6.5493404538  | -1.0877506988 |
| C | -0.6923097810 | 7.1422012035  | 1.2320408717  |
| C | -1.4160962761 | 6.7550525721  | 0.0940482758  |
| C | -2.8187644142 | 6.2913767722  | 0.1651457613  |
| C | -3.6843599583 | 6.3092373117  | -0.9387425915 |
| C | -3.2282006234 | 5.5615025485  | 1.2891398700  |
| C | -4.8115505068 | 5.4990690532  | -0.9784858336 |
| C | -4.3510087691 | 4.7499300398  | 1.2478262017  |
| C | -5.1196236634 | 4.6322369350  | 0.0816179014  |
| C | -5.9987743435 | 3.4544378435  | -0.0758860697 |
| C | -6.0401253145 | 2.7840574964  | -1.3053811507 |
| C | -6.5920584630 | 2.8029362205  | 1.0148079467  |
| C | -6.4680354884 | 1.4689428880  | -1.3969081721 |
| C | -7.0119625188 | 1.4837071880  | 0.9225909480  |
| C | -6.8659790591 | 0.7438213855  | -0.2628347722 |
| H | -6.3844364397 | -0.9768187586 | -2.3607922420 |
| H | -5.6159823692 | -3.2523237387 | -2.1864680275 |
| H | -6.6664321152 | -3.3078627028 | 1.9725628347  |
| H | -7.3870953960 | -1.0032142712 | 1.8222102671  |
| H | -5.4339435649 | -5.4955877229 | -1.8710684709 |
| H | -3.4444805095 | -6.9227226963 | -1.8010637707 |
| H | -2.5871869225 | -5.5207771041 | 2.1628630653  |
| H | -4.5567335792 | -4.0940401847 | 2.0903783924  |
| H | -1.2203483816 | -6.2479948306 | -1.9894269507 |

|   |               |               |               |
|---|---------------|---------------|---------------|
| H | 1.2173649710  | -6.2485958229 | -1.9894534783 |
| H | 1.2244675772  | -7.3893047390 | 2.1468349293  |
| H | -1.2280144966 | -7.3887251243 | 2.1468574364  |
| H | 3.4411326994  | -6.9243250035 | -1.8010926333 |
| H | 5.4313274921  | -5.4981914729 | -1.8710681664 |
| H | 4.5548344649  | -4.0962359556 | 2.0903830411  |
| H | 2.5845595280  | -5.5219105359 | 2.1628503922  |
| H | 5.6144112845  | -3.2549806497 | -2.1864549694 |
| H | 6.3838740672  | -0.9798660021 | -2.3607577276 |
| H | 7.3865646157  | -1.0067295960 | 1.8222237828  |
| H | 6.6648717463  | -3.3110528385 | 1.9725827001  |
| H | 6.3844429520  | 0.9767856748  | -2.3608251737 |
| H | 5.6160890474  | 3.2523830211  | -2.1865150574 |
| H | 6.6664230952  | 3.3078522564  | 1.9725228630  |
| H | 7.3870236049  | 1.0032094320  | 1.8222366341  |
| H | 5.4339371993  | 5.4955651016  | -1.8710911449 |
| H | 3.4444760697  | 6.9227138347  | -1.8010815185 |
| H | 2.5871855044  | 5.5208265183  | 2.1628600086  |
| H | 4.5566934891  | 4.0940396838  | 2.0903666909  |
| H | 1.2203202980  | 6.2479030173  | -1.9893994465 |
| H | -1.2173366486 | 6.2485032496  | -1.9894266747 |
| H | -1.2244612398 | 7.3893156447  | 2.1468445141  |
| H | 1.2280073931  | 7.3887356618  | 2.1468673669  |
| H | -3.4411274991 | 6.9243159631  | -1.8011105453 |
| H | -5.4313205352 | 5.4981682105  | -1.8710914097 |
| H | -4.5547948631 | 4.0962352957  | 2.0903712665  |
| H | -2.5845583022 | 5.5219587330  | 2.1628470583  |
| H | -5.6145166129 | 3.2550389799  | -2.1865023377 |
| H | -6.3838804843 | 0.9798326277  | -2.3607911352 |
| H | -7.3864930585 | 1.0067246265  | 1.8222496840  |
| H | -6.6648631274 | 3.3110419088  | 1.9725423278  |



Cartesian coordinates (in Å) of [11]-cycloparaphenylene optimized at the PBE0/6-31G(d,p) level of theory:

|   |               |               |               |
|---|---------------|---------------|---------------|
| C | -6.5768757131 | 3.8015098276  | 0.1609160577  |
| C | -5.8525064174 | 4.1359036007  | 1.3127251767  |
| C | -6.4686358557 | 4.6637581238  | -0.9402718232 |
| C | -4.9410880401 | 5.1815084670  | 1.3072440608  |
| C | -5.5555547547 | 5.7094621818  | -0.9461650374 |
| C | -4.7111892544 | 5.9380575700  | 0.1504437167  |
| C | -3.4658014060 | 6.7286245963  | 0.0451983989  |
| C | -2.8619432383 | 7.3444801373  | 1.1513351529  |
| C | -2.7209876404 | 6.6643362789  | -1.1400246012 |
| C | -1.5280234664 | 7.7288445617  | 1.1174530704  |
| C | -1.3882894301 | 7.0460857639  | -1.1730647755 |
| C | -0.7390246758 | 7.5116360278  | -0.0219584664 |
| C | 0.7390125594  | 7.5116397420  | 0.0219593355  |
| C | 1.3882776731  | 7.0460854874  | 1.1730640696  |
| C | 1.5280107378  | 7.7288465205  | -1.1174528658 |
| C | 2.7209778293  | 6.6643428478  | 1.1400253957  |
| C | 2.8619316306  | 7.3444857665  | -1.1513350455 |
| C | 3.4657893805  | 6.7286286773  | -0.0451990841 |
| C | 4.7111797711  | 5.9380658068  | -0.1504443458 |
| C | 5.5555450773  | 5.7094707062  | 0.9461646734  |
| C | 4.9410785086  | 5.1815151104  | -1.3072436425 |
| C | 6.4686283470  | 4.6637686157  | 0.9402716732  |
| C | 5.8525005031  | 4.1359133381  | -1.3127257294 |
| C | 6.5768683237  | 3.8015197674  | -0.1609158544 |
| C | 7.1925053644  | 2.4607374966  | -0.0582350727 |
| C | 7.0356629662  | 1.7352627704  | 1.1299092722  |
| C | 7.7166710325  | 1.7766468871  | -1.1648265477 |
| C | 7.2375947531  | 0.3644386204  | 1.1659275830  |
| C | 7.9224514923  | 0.4036197727  | -1.1273948231 |
| C | 7.6090408385  | -0.3461159011 | 0.0163293044  |
| C | 7.4073882142  | -1.8111167703 | -0.0162120566 |
| C | 7.4895239832  | -2.6036214180 | 1.1390722246  |
| C | 6.8719490534  | -2.4071716478 | -1.1661367910 |
| C | 6.9021440868  | -3.8598739141 | 1.1892873965  |
| C | 6.2930127087  | -3.6672758649 | -1.1192131660 |
| C | 6.2168732057  | -4.3825098758 | 0.0828663445  |
| C | 5.2275892449  | -5.4733882150 | 0.2126469513  |
| C | 4.3830709144  | -5.4744619918 | 1.3302088555  |
| C | 4.9212331323  | -6.3637843208 | -0.8261080081 |
| C | 3.2092231305  | -6.2093675455 | 1.3400828092  |
| C | 3.7513051509  | -7.1127698132 | -0.8078058232 |
| C | 2.8251873805  | -6.9903531045 | 0.2404239012  |
| C | 1.4171902904  | -7.4321090511 | 0.1266462999  |
| C | 0.5846007179  | -7.5382841480 | 1.2507160253  |
| C | 0.7965261701  | -7.5207352026 | -1.1280526810 |
| C | -0.7965139829 | -7.5207364930 | 1.1280527324  |
| C | -0.5845885202 | -7.5382851415 | -1.2507163966 |
| C | -1.4171779190 | -7.4321116711 | -0.1266465099 |
| C | -2.8251752161 | -6.9903564088 | -0.2404234958 |
| C | -3.7512938113 | -7.1127760903 | 0.8078053054  |
| C | -3.2092134104 | -6.2093727254 | -1.3400827842 |
| C | -4.9212225137 | -6.3637918099 | 0.8261086943  |
| C | -4.3830624939 | -5.4744691152 | -1.3302091449 |
| C | -5.2275803292 | -5.4733969589 | -0.2126470102 |
| C | -6.2168675225 | -4.3825214066 | -0.0828659418 |
| C | -6.2930047912 | -3.6672849300 | 1.1192124068  |
| C | -6.9021373584 | -3.8598847492 | -1.1892872396 |
| C | -6.8719465703 | -2.4071833017 | 1.1661373602  |
| C | -7.4895203921 | -2.6036337355 | -1.1390721699 |
| C | -7.4073836828 | -1.8111285914 | 0.0162115994  |
| C | -7.6090413364 | -0.3461284913 | -0.0163297085 |
| C | -7.9224513749 | 0.4036068591  | 1.1273948944  |
| C | -7.2375936653 | 0.3644268082  | -1.1659270629 |
| C | -7.7166744028 | 1.7766344840  | 1.1648265579  |
| C | -7.0356673313 | 1.7352518500  | -1.1299097350 |
| C | -7.1925077601 | 2.4607252503  | 0.0582355586  |
| H | -7.0732118133 | 4.4805120442  | -1.8245505475 |
| H | -5.4608090689 | 6.3274936289  | -1.8350708547 |
| H | -4.3049798162 | 5.3298958044  | 2.1749715065  |

|   |               |               |               |
|---|---------------|---------------|---------------|
| H | -5.9082669461 | 3.4911281069  | 2.1849241303  |
| H | -3.1542086891 | 6.1905204278  | -2.0159765903 |
| H | -0.8109345069 | 6.8606962857  | -2.0740013606 |
| H | -1.0770903615 | 8.1607247977  | 2.0068779886  |
| H | -3.4314033934 | 7.4823904650  | 2.0666681222  |
| H | 1.0770773132  | 8.1607279389  | -2.0068770336 |
| H | 3.4313909480  | 7.4823957439  | -2.0666686084 |
| H | 3.1541990834  | 6.1905255458  | 2.0159766772  |
| H | 0.8109238829  | 6.8606972529  | 2.0740014369  |
| H | 4.3049706920  | 5.3299018018  | -2.1749714061 |
| H | 5.9082608894  | 3.4911367969  | -2.1849239985 |
| H | 7.0732038895  | 4.4805230781  | 1.8245507586  |
| H | 5.4607986281  | 6.3275022061  | 1.8350703412  |
| H | 7.9216296084  | 2.3202349254  | -2.0833251078 |
| H | 8.2876398816  | -0.1013990351 | -2.0176387445 |
| H | 6.9800632996  | -0.1791406026 | 2.0698821872  |
| H | 6.6269231036  | 2.2293772664  | 2.0062779690  |
| H | 6.7906177596  | -1.8263528297 | -2.0801885768 |
| H | 5.7750663820  | -4.0445621921 | -1.9964393948 |
| H | 6.9276980780  | -4.4254197902 | 2.1170634966  |
| H | 7.9719222338  | -2.2072195796 | 2.0284444839  |
| H | 5.5888546915  | -6.4383434340 | -1.6804932287 |
| H | 3.5323362398  | -7.7671013956 | -1.6469067533 |
| H | 2.5240189406  | -6.0760057293 | 2.1706734843  |
| H | 4.5859593787  | -4.7925147140 | 2.1506906496  |
| H | 1.3979428474  | -7.4758522497 | -2.0310003328 |
| H | -1.0195870202 | -7.5564682002 | -2.2456140130 |
| H | -1.3979307201 | -7.4758541112 | 2.0310003886  |
| H | 1.0195991573  | -7.5564665077 | 2.2456136501  |
| H | -2.5240091044 | -6.0760088184 | -2.1706730563 |
| H | -4.5859520680 | -4.7925217466 | -2.1506906085 |
| H | -5.5888438315 | -6.4383519917 | 1.6804940531  |
| H | -3.5323233965 | -7.7671065450 | 1.6469066642  |
| H | -6.9276922123 | -4.4254317480 | -2.1170626223 |
| H | -7.9719185798 | -2.2072324257 | -2.0284447248 |
| H | -6.7906148479 | -1.8263636849 | 2.0801887290  |
| H | -5.7750608876 | -4.0445718511 | 1.9964396448  |
| H | -6.9800625053 | -0.1791517882 | -2.0698820029 |
| H | -6.6269261781 | 2.2293667174  | -2.0062777591 |
| H | -7.9216325656 | 2.3202218134  | 2.0833255862  |
| H | -8.2876396217 | -0.1014124733 | 2.0176385474  |

Cartesian coordinates (in Å) of [12]-cycloparaphenylene optimized at the PBE0/6-31G(d,p) level of theory:

|   |               |               |               |
|---|---------------|---------------|---------------|
| C | 6.8837231072  | 4.5857281582  | -0.0575928184 |
| C | 7.5849843099  | 4.1030772502  | 1.0571391845  |
| C | 6.9011259605  | 3.8004953864  | -1.2181653243 |
| C | 8.1447910811  | 2.8328047300  | 1.0574503423  |
| C | 7.4605067688  | 2.5316378522  | -1.2178410265 |
| C | 8.0282462185  | 1.9894513536  | -0.0573198337 |
| C | 8.2530624725  | 0.5304458375  | 0.0235944281  |
| C | 7.8860133906  | -0.1542416784 | 1.1897631118  |
| C | 8.6060781527  | -0.2418398311 | -1.0927518977 |
| C | 7.7343766456  | -1.5325098000 | 1.1955095348  |
| C | 8.4550559370  | -1.6218894683 | -1.0867033102 |
| C | 7.9435940579  | -2.2899930956 | 0.0355690721  |
| C | 7.4092504654  | -3.6668604064 | -0.0349976810 |
| C | 7.3360763748  | -4.5050764403 | 1.0870792640  |
| C | 6.7444432043  | -4.0852139490 | -1.1952350623 |
| C | 6.5168087497  | -5.6261228239 | 1.0929941702  |
| C | 5.9268184585  | -5.2052783930 | -1.1895868784 |
| C | 5.7355123398  | -5.9579748362 | -0.0233984152 |
| C | 4.5857283101  | -6.8837228361 | 0.0575928048  |
| C | 3.8004954503  | -6.9011257672 | 1.2181652016  |
| C | 4.1030771322  | -7.5849843428 | -1.0571389929 |
| C | 2.5316378701  | -7.4605064756 | 1.2178410421  |
| C | 2.8328045438  | -8.1447908975 | -1.0574502539 |
| C | 1.9894511411  | -8.0282455775 | 0.0573198505  |
| C | 0.5304457803  | -8.2530629386 | -0.0235946029 |
| C | -0.2418397244 | -8.6060776980 | 1.0927519986  |
| C | -0.1542418784 | -7.8860130591 | -1.1897630470 |
| C | -1.6218894716 | -8.4550563078 | 1.0867032615  |
| C | -1.5325099681 | -7.7343764546 | -1.1955093852 |
| C | -2.2899932652 | -7.9435944912 | -0.0355690163 |
| C | -3.6668602240 | -7.4092500487 | 0.0349974942  |
| C | -4.0852139481 | -6.7444434850 | 1.1952351233  |
| C | -4.5050766727 | -7.3360764515 | -1.0870792813 |
| C | -5.2052782430 | -5.9268184685 | 1.1895869647  |
| C | -5.6261227242 | -6.5168084120 | -1.0929941939 |
| C | -5.9579745258 | -5.7355120156 | 0.0233984994  |
| C | -6.8837233318 | -4.5857286070 | -0.0575930025 |
| C | -7.5849841613 | -4.1030771772 | 1.0571390061  |
| C | -6.9011256462 | -3.8004952572 | -1.2181651554 |
| C | -8.1447910907 | -2.8328047374 | 1.0574502525  |
| C | -7.4605065258 | -2.5316377716 | -1.2178409606 |
| C | -8.0282460140 | -1.9894512732 | -0.0573198084 |
| C | -8.2530624115 | -0.5304457967 | 0.0235944381  |
| C | -7.8860133985 | 0.1542417260  | 1.1897631337  |
| C | -8.6060781211 | 0.2418398435  | -1.0927518970 |
| C | -7.7343766928 | 1.5325098463  | 1.1955095521  |
| C | -8.4550559642 | 1.6218894851  | -1.0867033056 |
| C | -7.9435940089 | 2.2899931043  | 0.0355690521  |
| C | -7.4092504913 | 3.6668604408  | -0.0349976884 |
| C | -7.3360763927 | 4.5050764650  | 1.0870792583  |
| C | -6.7444432112 | 4.0852139584  | -1.1952350668 |
| C | -6.5168087400 | 5.6261228254  | 1.0929941753  |
| C | -5.9268184464 | 5.2052783896  | -1.1895868783 |
| C | -5.7355123573 | 5.9579748588  | -0.0233984230 |
| C | -4.5857283107 | 6.8837228318  | 0.0575928081  |
| C | -3.8004954564 | 6.9011257648  | 1.2181652055  |
| C | -4.1030771308 | 7.5849843385  | -1.0571389933 |
| C | -2.5316378786 | 7.4605064820  | 1.2178410570  |
| C | -2.8328045537 | 8.1447909118  | -1.0574502401 |
| C | -1.9894511539 | 8.0282455666  | 0.0573198560  |
| C | -0.5304457970 | 8.2530629089  | -0.0235945761 |
| C | 0.2418397289  | 8.6060777134  | 1.0927519843  |
| C | 0.1542418591  | 7.8860131606  | -1.1897630549 |
| C | 1.6218894573  | 8.4550561911  | 1.0867032757  |
| C | 1.5325099358  | 7.7343765320  | -1.1955094163 |
| C | 2.2899932340  | 7.9435943616  | -0.0355690073 |
| C | 3.6668602254  | 7.4092501255  | 0.0349975476  |
| C | 4.0852137009  | 6.7444432457  | 1.1952351144  |
| C | 4.5050765419  | 7.3360763675  | -1.0870793136 |

|   |               |               |               |
|---|---------------|---------------|---------------|
| C | 5.2052780243  | 5.9268182844  | 1.1895867343  |
| C | 5.6261226717  | 6.5168084372  | -1.0929940795 |
| C | 5.9579747936  | 5.7355120172  | 0.0233984987  |
| H | 7.6548707331  | 4.7156767674  | 1.9520682818  |
| H | 8.6448150057  | 2.4720662466  | 1.9523172940  |
| H | 7.3473408839  | 1.9060900957  | -2.0984588954 |
| H | 6.3627580508  | 4.1382974804  | -2.0988745625 |
| H | 7.5989190740  | 0.4108927445  | 2.0716176432  |
| H | 7.3321793204  | -2.0142862529 | 2.0818454159  |
| H | 8.6978596228  | -2.1879511233 | -1.9820494832 |
| H | 8.9646356137  | 0.2497551439  | -1.9931772945 |
| H | 7.8966053449  | -4.2516597181 | 1.9829335764  |
| H | 6.4499624958  | -6.2309939195 | 1.9933170019  |
| H | 5.3339562306  | -5.4285141155 | -2.0717274975 |
| H | 6.7720421179  | -3.4585261319 | -2.0817552073 |
| H | 4.1382974690  | -6.3627579131 | 2.0988745017  |
| H | 1.9060901443  | -7.3473408211 | 2.0984589291  |
| H | 2.4720661999  | -8.6448144228 | -1.9523175210 |
| H | 4.7156765559  | -7.6548705684 | -1.9520680582 |
| H | 0.2497551865  | -8.9646361033 | 1.9931771131  |
| H | -2.1879511568 | -8.6978599088 | 1.9820493814  |
| H | -2.0142864425 | -7.3321798258 | -2.0818456105 |
| H | 0.4108925438  | -7.5989190303 | -2.0716176137 |
| H | -3.4585260540 | -6.7720421096 | 2.0817552790  |
| H | -5.4285138501 | -5.3339559107 | 2.0717273470  |
| H | -6.2309936464 | -6.4499620346 | -1.9933171914 |
| H | -4.2516596738 | -7.8966049682 | -1.9829337367 |
| H | -7.6548709494 | -4.7156768530 | 1.9520679161  |
| H | -8.6448149772 | -2.4720664016 | 1.9523172687  |
| H | -7.3473407382 | -1.9060901534 | -2.0984589348 |
| H | -6.3627580680 | -4.1382974292 | -2.0988745085 |
| H | -7.5989190562 | -0.4108926901 | 2.0716176605  |
| H | -7.3321793464 | 2.0142863070  | 2.0818454169  |
| H | -8.6978596119 | 2.1879511226  | -1.9820495002 |
| H | -8.9646355361 | -0.2497551540 | -1.9931773027 |
| H | -7.8966053616 | 4.2516597390  | 1.9829335693  |
| H | -6.4499625006 | 6.2309939378  | 1.9933169983  |
| H | -5.3339562285 | 5.4285141182  | -2.0717275007 |
| H | -6.7720421151 | 3.4585261426  | -2.0817552142 |
| H | -4.1382974861 | 6.3627579082  | 2.0988745024  |
| H | -1.9060901570 | 7.3473408129  | 2.0984589451  |
| H | -2.4720661941 | 8.6448144179  | -1.9523175114 |
| H | -4.7156765547 | 7.6548705667  | -1.9520680590 |
| H | -0.2497551544 | 8.9646360740  | 1.9931771334  |
| H | 2.1879511423  | 8.6978598030  | 1.9820493908  |
| H | 2.0142864232  | 7.3321799393  | -2.0818456305 |
| H | -0.4108925311 | 7.5989191112  | -2.0716176335 |
| H | 3.4585258691  | 6.7720419831  | 2.0817552785  |
| H | 5.4285137810  | 5.3339561328  | 2.0717273563  |
| H | 6.2309936645  | 6.4499621699  | -1.9933169833 |
| H | 4.2516597535  | 7.8966051121  | -1.9829336931 |

Cartesian coordinates (in Å) of [13]-cycloparaphenylene optimized at the PBE0/6-31G(d,p) level of theory:

|   |               |                |               |
|---|---------------|----------------|---------------|
| C | -5.6670748308 | -6.8725109618  | 0.4923663219  |
| C | -5.7626455413 | -5.9463028538  | 1.5407284636  |
| C | -6.6419133283 | -6.7977444061  | -0.5145659952 |
| C | -6.6981771339 | -4.9238394724  | 1.5198131671  |
| C | -7.5676870973 | -5.7629345174  | -0.5462579875 |
| C | -7.5749886176 | -4.7667576576  | 0.4393924537  |
| C | -8.2835715386 | -3.4801112635  | 0.2761191155  |
| C | -8.8160087268 | -2.7705691386  | 1.3611812529  |
| C | -8.2386965527 | -2.8292578705  | -0.9630580453 |
| C | -9.1622382860 | -1.4316174233  | 1.2408617496  |
| C | -8.5699705351 | -1.4873802714  | -1.0784721135 |
| C | -8.9742107154 | -0.7387597770  | 0.0353312662  |
| C | -8.9742098311 | 0.7387646615   | -0.0353312596 |
| C | -8.5699691787 | 1.4873853952   | 1.0784718321  |
| C | -9.1622381854 | 1.4316228599   | -1.2408612990 |
| C | -8.2386953449 | 2.8292630011   | 0.9630582534  |
| C | -8.8160071009 | 2.7705742140   | -1.3611815417 |
| C | -8.2835698094 | 3.4801158720   | -0.2761192368 |
| C | -7.5749856202 | 4.7667615362   | -0.4393926641 |
| C | -7.5676833188 | 5.7629387436   | 0.5462575229  |
| C | -6.6981735031 | 4.9238429318   | -1.5198129013 |
| C | -6.6419088537 | 6.7977479089   | 0.5145660545  |
| C | -5.7626416535 | 5.9463061808   | -1.5407288453 |
| C | -5.6670706578 | 6.8725139984   | -0.4923665915 |
| C | -4.4613286047 | 7.7216210635   | -0.3766368230 |
| C | -3.9534976055 | 8.0658507202   | 0.8843911530  |
| C | -3.6654840244 | 8.0356954137   | -1.4879319089 |
| C | -2.6658868623 | 8.5577186684   | 1.0347110925  |
| C | -2.3672526559 | 8.5013874056   | -1.3360233994 |
| C | -1.8097924357 | 8.7042323939   | -0.0657764950 |
| C | -0.3482758896 | 8.8472869690   | 0.1067586724  |
| C | 0.2633389657  | 8.2760628114   | 1.2315255886  |
| C | 0.4952163276  | 9.3630824808   | -0.8887994594 |
| C | 1.6377189124  | 8.1265949475   | 1.3069722316  |
| C | 1.8740545093  | 9.2035470728   | -0.8187818036 |
| C | 2.4717096017  | 8.5320462233   | 0.2568540119  |
| C | 3.8703882425  | 8.0542118287   | 0.2443260419  |
| C | 4.6019159892  | 7.8936951950   | 1.4301723343  |
| C | 4.4241587008  | 7.5338229712   | -0.9324415370 |
| C | 5.7497324973  | 7.1156210322   | 1.4632578249  |
| C | 5.5744013873  | 6.7566158219   | -0.8997426036 |
| C | 6.2166723845  | 6.4670736021   | 0.3110110842  |
| C | 7.1759422451  | 5.3450225518   | 0.3856689743  |
| C | 7.0552707255  | 4.4312701153   | 1.4404970483  |
| C | 8.0702469346  | 5.0252678178   | -0.6453967174 |
| C | 7.6955248980  | 3.2039240976   | 1.4035035693  |
| C | 8.7222746654  | 3.7985565490   | -0.6753759774 |
| C | 8.4986327703  | 2.8312188979   | 0.3163015024  |
| C | 8.8874560089  | 1.4124405944   | 0.1625803429  |
| C | 8.9795360156  | 0.5521763120   | 1.2663491667  |
| C | 8.9648758340  | 0.8255370403   | -1.1085502412 |
| C | 8.9648758031  | -0.8255423236  | 1.1085503589  |
| C | 8.9795359344  | -0.5521816007  | -1.2663494310 |
| C | 8.8874553229  | -1.41244454628 | -0.1625804182 |
| C | 8.4986306276  | -2.8312233927  | -0.3163014125 |
| C | 8.7222718729  | -3.7985614652  | 0.6753759401  |
| C | 7.6955222295  | -3.2039285074  | -1.4035030795 |
| C | 8.0702438745  | -5.0252725393  | 0.6453970697  |
| C | 7.0552683807  | -4.4312747309  | -1.4404975354 |
| C | 7.1759394161  | -5.3450266485  | -0.3856690487 |
| C | 6.2166686539  | -6.4670769215  | -0.3110112334 |
| C | 5.5743968491  | -6.7566186418  | 0.8997421998  |
| C | 5.7497286790  | -7.1156249116  | -1.4632575412 |
| C | 4.4241544092  | -7.5338259869  | 0.9324416570  |
| C | 4.6019116394  | -7.8936984400  | -1.4301726235 |
| C | 3.8703843189  | -8.0542148701  | -0.2443261200 |
| C | 2.4717048670  | -8.5320468527  | -0.2568538383 |
| C | 1.8740490614  | -9.2035480238  | 0.8187814974  |
| C | 1.6377141141  | -8.1265955126  | -1.3069719597 |

|   |               |               |               |
|---|---------------|---------------|---------------|
| C | 0.4952108570  | -9.3630819461 | 0.8887999759  |
| C | 0.2633340473  | -8.2760634232 | -1.2315261593 |
| C | -0.3482807549 | -8.8472868120 | -0.1067588770 |
| C | -1.8097970102 | -8.7042301609 | 0.0657766911  |
| C | -2.3672576024 | -8.5013851968 | 1.3360235007  |
| C | -2.6658918360 | -8.5577170174 | -1.0347106647 |
| C | -3.6654888420 | -8.0356930036 | 1.4879322258  |
| C | -3.9535023864 | -8.0658483269 | -0.8843910593 |
| C | -4.4613334089 | -7.7216190272 | 0.3766370145  |
| H | -6.6553769366 | -7.5378121972 | -1.3099330715 |
| H | -8.2766389090 | -5.7078920864 | -1.3684726917 |
| H | -6.6709865079 | -4.1658351747 | 2.2976430134  |
| H | -5.0232760741 | -5.9542817258 | 2.3354880497  |
| H | -7.8264236213 | -3.3504253411 | -1.8224015447 |
| H | -8.4043896028 | -0.9880722365 | -2.0282411733 |
| H | -9.5482102407 | -0.9056869330 | 2.1096402050  |
| H | -8.9264526470 | -3.2660887075 | 2.3221583193  |
| H | -9.5482108313 | 0.9056927521  | -2.1096396935 |
| H | -8.9264505314 | 3.2660938044  | -2.3221586562 |
| H | -7.8264220316 | 3.3504303575  | 1.8224016104  |
| H | -8.4043887601 | 0.9880774727  | 2.0282410371  |
| H | -6.6709830400 | 4.1658386219  | -2.2976427453 |
| H | -5.0232716527 | 5.9542843439  | -2.3354879194 |
| H | -6.6553719378 | 7.5378156305  | 1.3099331508  |
| H | -8.2766349971 | 5.7078968455  | 1.3684723949  |
| H | -4.0417915117 | 7.8529451799  | -2.4902231213 |
| H | -1.7491676472 | 8.6251754729  | -2.2204529280 |
| H | -2.2996929238 | 8.7726511213  | 2.0343860221  |
| H | -4.5411798841 | 7.8640039103  | 1.7747419333  |
| H | 0.0647313598  | 9.8705273952  | -1.7476819927 |
| H | 2.4963560336  | 9.5827393418  | -1.6250231701 |
| H | 2.0647424038  | 7.5866657739  | 2.1466958348  |
| H | -0.3514683055 | 7.8441830880  | 2.0146164007  |
| H | 3.8829978286  | 7.6386898988  | -1.8685704229 |
| H | 5.9108968872  | 6.2696075705  | -1.8106853595 |
| H | 6.2705518281  | 6.9721804790  | 2.4061676084  |
| H | 4.2400651575  | 8.3495291669  | 2.3478921116  |
| H | 8.2337273336  | 5.7360502585  | -1.4511518584 |
| H | 9.3912234374  | 3.5764790230  | -1.5022098546 |
| H | 7.4786516690  | 2.4813910090  | 2.1836114907  |
| H | 6.3590274030  | 4.6404064341  | 2.2472081427  |
| H | 8.9217027568  | 1.4528409195  | -1.9939602422 |
| H | 8.9964601577  | -0.9651630875 | -2.2707784279 |
| H | 8.9217013459  | -1.4528461510 | 1.9939603380  |
| H | 8.9964605194  | 0.9651576847  | 2.2707782060  |
| H | 7.4786493703  | -2.4813954776 | -2.1836111450 |
| H | 6.3590240296  | -4.6404103820 | -2.2472079654 |
| H | 8.2337232534  | -5.7360547101 | 1.4511526456  |
| H | 9.3912209881  | -3.5764843968 | 1.5022096641  |
| H | 6.2705484493  | -6.9721850597 | -2.4061672048 |
| H | 4.2400603374  | -8.3495319341 | -2.3478924585 |
| H | 3.8829934742  | -7.6386927739 | 1.8685704868  |
| H | 5.9108933124  | -6.2696117309 | 1.8106852993  |
| H | 2.0647378760  | -7.5866667543 | -2.1466957547 |
| H | -0.3514730967 | -7.8441828169 | -2.0146165660 |
| H | 0.0647254721  | -9.8705261387 | 1.7476827126  |
| H | 2.4963502212  | -9.5827406688 | 1.6250229422  |
| H | -2.2996980585 | -8.7726500869 | -2.0343855143 |
| H | -4.5411846301 | -7.8640016328 | -1.7747419037 |
| H | -4.0417962957 | -7.8529422883 | 2.4902233406  |
| H | -1.7491728103 | -8.6251736130 | 2.2204531045  |

Cartesian coordinates (in Å) of [14]-cycloparaphenylene optimized at the PBE0/6-31G(d,p) level of theory:

|   |               |               |               |
|---|---------------|---------------|---------------|
| C | 9.4138891482  | -2.0744099483 | -0.0348178243 |
| C | 9.1591528007  | -1.3286198889 | -1.1931773544 |
| C | 9.8913406710  | -1.3815945441 | 1.0870923758  |
| C | 9.2548235034  | 0.0549107176  | -1.1919528276 |
| C | 9.9870703921  | 0.0032761886  | 1.0883656082  |
| C | 9.6097861772  | 0.7568593653  | -0.0324813320 |
| C | 9.3819331834  | 2.2158647350  | 0.0342232254  |
| C | 9.5156015231  | 3.0490776504  | -1.0858112120 |
| C | 8.8273159419  | 2.7762193438  | 1.1922824465  |
| C | 9.0011448731  | 4.3385953250  | -1.0869305128 |
| C | 8.3137688957  | 4.0643264931  | 1.1912920115  |
| C | 8.3301574032  | 4.8518759928  | 0.0323314842  |
| C | 7.4904051170  | 6.0665186466  | -0.0335718107 |
| C | 6.7490402087  | 6.3323593683  | -1.1924344037 |
| C | 7.2468819202  | 6.8720337655  | 1.0879940119  |
| C | 5.7274053587  | 7.2702068109  | -1.1919196630 |
| C | 6.2243204481  | 7.8108851825  | 1.0884585958  |
| C | 5.4001393643  | 7.9854868732  | -0.0324168003 |
| C | 4.1177089523  | 8.7176697426  | 0.0337240714  |
| C | 3.5492713193  | 9.3418309361  | -1.0859426582 |
| C | 3.3336338299  | 8.6328800286  | 1.1919735636  |
| C | 2.2200338722  | 9.7427320518  | -1.0859967521 |
| C | 2.0058898867  | 9.0332220341  | 1.1919294855  |
| C | 1.4006704123  | 9.5375669629  | 0.0333977162  |
| C | -0.0725575535 | 9.6388019641  | -0.0338245430 |
| C | -0.7416227088 | 9.2247073407  | -1.1931837633 |
| C | -0.8553613471 | 9.9501232051  | 1.0872573603  |
| C | -2.1117786225 | 9.0099411277  | -1.1935645209 |
| C | -2.2267697575 | 9.7354075051  | 1.0867802645  |
| C | -2.8760510932 | 9.1996790840  | -0.0347352556 |
| C | -4.2481461211 | 8.6535749724  | 0.0322235790  |
| C | -5.0904871621 | 8.5979879102  | -1.0873681997 |
| C | -4.6704638288 | 7.9889125355  | 1.1910248219  |
| C | -6.2333494818 | 7.8094900343  | -1.0869639092 |
| C | -5.8120641221 | 7.2014236608  | 1.1914466228  |
| C | -6.5839038285 | 7.0420929484  | 0.0331530752  |
| C | -7.5812785770 | 5.9530105690  | -0.0335080521 |
| C | -7.6758321685 | 5.1713160150  | -1.1924234882 |
| C | -8.3114682442 | 5.5354580545  | 1.0885514726  |
| C | -8.3635123571 | 3.9669628273  | -1.1912998289 |
| C | -8.9992828903 | 4.3298024903  | 1.0897798844  |
| C | -8.9873469853 | 3.4879487373  | -0.0317633134 |
| C | -9.4154572207 | 2.0745782974  | 0.0345391530  |
| C | -9.8965875951 | 1.3819904230  | -1.0859662377 |
| C | -9.1585527384 | 1.3287607954  | 1.1923707688  |
| C | -9.9916938877 | -0.0030544859 | -1.0872468290 |
| C | -9.2535708311 | -0.0546759771 | 1.1911376271  |
| C | -9.6101443419 | -0.7566290890 | 0.0321875566  |
| C | -9.3804685733 | -2.2153483490 | -0.0344760186 |
| C | -8.8277865395 | -2.7765954013 | -1.1930598851 |
| C | -9.5107314559 | -3.0471842957 | 1.0869581575  |
| C | -8.3147545989 | -4.0650556844 | -1.1920779913 |
| C | -8.9968837392 | -4.3368044468 | 1.0880693807  |
| C | -8.3297034358 | -4.8519095964 | -0.0326026639 |
| C | -7.4914899879 | -6.0676222279 | 0.0333196643  |
| C | -7.2504326438 | -6.8758488433 | -1.0868584547 |
| C | -6.7487808329 | -6.3318485308 | 1.1916604621  |
| C | -6.2273676638 | -7.8143438329 | -1.0873239776 |
| C | -5.7268365648 | -7.2691598500 | 1.1911438329  |
| C | -5.4005642496 | -7.9856719933 | 0.0321476279  |
| C | -4.1172191411 | -8.7162425412 | -0.0339922368 |
| C | -3.3336607347 | -8.6334696935 | -1.1927648500 |
| C | -3.5477258864 | -9.3369089592 | 1.0870488228  |
| C | -2.0059510778 | -9.0344025333 | -1.1927519762 |
| C | -2.2187799146 | -9.7383313673 | 1.0870686206  |
| C | -1.4003579062 | -9.5372201574 | -0.0337256584 |
| C | 0.0727469253  | -9.6402994400 | 0.0335099697  |
| C | 0.8561280329  | -9.9552681029 | -1.0861796796 |
| C | 0.7413614403  | -9.2241207663 | 1.1923510187  |

|   |                |                |               |
|---|----------------|----------------|---------------|
| C | 2.2275726206   | -9.7399452120  | -1.0856994399 |
| C | 2.1112859181   | -9.0087813810  | 1.1927283696  |
| C | 2.8759032981   | -9.2000897254  | 0.0344091886  |
| C | 4.2473015703   | -8.6522548466  | -0.0325348223 |
| C | 4.6709495513   | -7.9892862942  | -1.1918530773 |
| C | 5.0875412671   | -8.5936564141  | 1.0884497445  |
| C | 5.8130206141   | -7.2022370578  | -1.1922722510 |
| C | 6.2306598351   | -7.8057600787  | 1.0880484933  |
| C | 6.5838700018   | -7.0416635907  | -0.0334617276 |
| C | 7.5826030772   | -5.9538273954  | 0.0332388213  |
| C | 8.3159525449   | -5.5380700603  | -1.0874573284 |
| C | 7.6752748008   | -5.1711906788  | 1.1916386336  |
| C | 9.0032883797   | -4.3319983219  | -1.0887176043 |
| C | 8.3623515533   | -3.9666543328  | 1.1904830754  |
| C | 8.9875755545   | -3.4883232348  | 0.0314380940  |
| H | 8.7765395746   | -1.8305112288  | -2.0770972880 |
| H | 8.9447072284   | 0.6063623801   | -2.0747374829 |
| H | 10.3315010349  | 0.5118672190   | 1.9848264788  |
| H | 10.1615136169  | -1.9351889276  | 1.9823209481  |
| H | 10.0030545075  | 2.6695422273   | -1.9798128027 |
| H | 9.0936677252   | 4.9479085569   | -1.9820511539 |
| H | 7.7935247483   | 4.4253993874   | 2.0736848694  |
| H | 8.6981724213   | 2.1572514542   | 2.0753806170  |
| H | 6.9032981136   | 5.7196672742   | -2.0759014849 |
| H | 5.1031620972   | 7.3722996393   | -2.0748614074 |
| H | 6.0403860526   | 8.3980477269   | 1.9841110414  |
| H | 7.8483491238   | 6.7384434078   | 1.9830853227  |
| H | 4.1491614578   | 9.4876984430   | -1.9803119095 |
| H | 1.8002732424   | 10.1948192866  | -1.9805909494 |
| H | 1.3993516538   | 8.8505450955   | 2.0742019188  |
| H | 3.7375819142   | 8.1457448129   | 2.0746845492  |
| H | -0.1655278512  | 8.9634080707   | -2.0761105825 |
| H | -2.5797279829  | 8.5855705984   | -2.0770896510 |
| H | -2.8014047731  | 9.9577790394   | 1.9819017823  |
| H | -0.3775519835  | 10.3372878316  | 1.9831852883  |
| H | -4.8295391907  | 9.1566003972   | -1.9822127124 |
| H | -6.8485679262  | 7.7640697577   | -1.9815419442 |
| H | -6.0478488155  | 6.6146485441   | 2.0744309165  |
| H | -4.0379590688  | 8.0013393048   | 2.0737979803  |
| H | -7.1131436049  | 5.4573978038   | -2.0762920402 |
| H | -8.3244447639  | 3.3361892354   | -2.0746287086 |
| H | -9.5301615619  | 4.0205814748   | 1.9861462195  |
| H | -8.3148833979  | 6.1509065833   | 1.9841309057  |
| H | -10.1702927804 | 1.9357139946   | -1.9800712773 |
| H | -10.3391892408 | -0.5116107675  | -1.9825716078 |
| H | -8.9415318951  | -0.6060007668  | 2.0732853833  |
| H | -8.7745646282  | 1.8306732554   | 2.0756435458  |
| H | -8.6998872491  | -2.1582149374  | -2.0767898341 |
| H | -7.7961674225  | -4.4270730434  | -2.0750937674 |
| H | -9.0866240517  | -4.9448364736  | 1.9843155177  |
| H | -9.9949280078  | -2.6662110266  | 1.9820856744  |
| H | -7.8541967855  | -6.7449547316  | -1.9808363748 |
| H | -6.0453477669  | -8.4038434199  | -1.9818623715 |
| H | -5.1015081791  | -7.3696900198  | 2.0734614936  |
| H | -6.9021877929  | -5.7180873612  | 2.0744948883  |
| H | -3.7379287315  | -8.1476435223  | -2.0760887591 |
| H | -1.3997242539  | -8.8535584477  | -2.0756514920 |
| H | -1.7983063684  | -10.1874859130 | 1.9827776937  |
| H | -4.1466942589  | -9.4793614779  | 1.9825515803  |
| H | 0.3789448346   | -10.3458896185 | -1.9809729180 |
| H | 2.8028858291   | -9.9652361115  | -1.9796812330 |
| H | 2.5787094514   | -8.5825786923  | 2.0756134498  |
| H | 0.1649478642   | -8.9614928668  | 2.0746361248  |
| H | 4.0393214001   | -8.0027582651  | -2.0752782272 |
| H | 6.0500665166   | -6.6168752878  | -2.0758950837 |
| H | 6.8439962464   | -7.7579912493  | 1.9837683558  |
| H | 4.8245302580   | -9.1494359488  | 1.9844203586  |
| H | 8.3223934255   | -6.1551813118  | -1.9819060583 |
| H | 9.5368449795   | -4.0240823008  | -1.9839697245 |
| H | 8.3215761650   | -3.3351577704  | 2.0731808376  |
| H | 7.1113777423   | -5.4566968846  | 2.0748841834  |



Cartesian coordinates (in Å) of [15]-cycloparaphenylene optimized at the PBE0/6-31G(d,p) level of theory:

```
C -7.1613231841 -7.4231258086 -0.1950176284
C -6.3586278402 -7.5762058185 -1.3328126763
C -6.8574891074 -8.2144508504 0.9220685340
C -5.2347107166 -8.3890738876 -1.3150396806
C -5.7322399440 -9.0272167924 0.9403052165
C -4.8627822807 -9.0855514691 -0.1577370944
C -3.5137929400 -9.6823557151 -0.0636694806
C -2.8624617410 -10.2434735378 -1.1709887002
C -2.7725794500 -9.5331237506 1.1156594694
C -1.5049135208 -10.5313441343 -1.1340032746
C -1.4160417451 -9.8194372061 1.1520872458
C -0.7389369217 -10.2689012272 0.0107534439
C 0.7389339645 -10.2689013952 -0.0107535044
C 1.4160393232 -9.8194373133 -1.1520870231
C 1.5049108603 -10.5313450846 1.1340028114
C 2.7725772307 -9.5331249507 -1.1156598291
C 2.8624590768 -10.2434742078 1.1709889349
C 3.5137900432 -9.6823564765 0.0636696184
C 4.8627796603 -9.0855529055 0.1577373100
C 5.7322376101 -9.0272181830 -0.9403048558
C 5.2347083796 -8.3890748421 1.3150394676
C 6.8574867176 -8.2144522626 -0.9220686651
C 6.3586259303 -7.5762072891 1.3328128929
C 7.1613211684 -7.4231277528 0.1950177897
C 8.1508361903 -6.3266124985 0.1378265018
C 8.2767315624 -5.5699992973 -1.0345770912
C 8.8509391539 -5.8857598164 1.2699440604
C 8.9743342093 -4.3718768727 -1.0438103202
C 9.5494041318 -4.6860025301 1.2605874995
C 9.5784471583 -3.8735113846 0.1180441254
C 10.0435525814 -2.4709483951 0.1523853232
C 10.5658183566 -1.8316707737 -0.9812967082
C 9.7969436626 -1.6814485233 1.2833400034
C 10.7147135209 -0.4525404227 -1.0223599459
C 9.9486814639 -0.3031519020 1.2435219362
C 10.3511165337 0.3476513792 0.0700488692
C 10.1941749089 1.8125710515 -0.0460896577
C 9.6551062602 2.3533554143 -1.2204154553
C 10.3906496025 2.6825396228 1.0355013286
C 9.2237581180 3.6696352007 -1.2721696853
C 9.9645244164 4.0031071718 0.9808310901
C 9.3159510546 4.5102626534 -0.1544779194
C 8.5817846909 5.7931416402 -0.1455161952
C 8.3490054287 6.5232696637 -1.3202440423
C 7.9316442319 6.2214899678 1.0196709580
C 7.4097786639 7.5439962175 -1.3567079678
C 7.0003592733 7.2496167214 0.9862888580
C 6.6712681096 7.8878919290 -0.2161747379
C 5.4581082038 8.7280063303 -0.2922482422
C 4.5674469425 8.5375820722 -1.3562523114
C 5.0564786699 9.5854455202 0.7408422368
C 3.2943726461 9.0838374920 -1.3334327328
C 3.7851988112 10.1454510010 0.7551863978
C 2.8525086049 9.8605993782 -0.2532946805
C 1.4160181244 10.1888965282 -0.1307839309
C 0.5805468635 10.2661517567 -1.2542242264
C 0.8002815428 10.2527123918 1.1272046259
C -0.8002789112 10.2527124048 -1.1272048123
C -0.5805442359 10.2661519754 1.2542244605
C -1.4160151489 10.1888968234 0.1307839811
C -2.8525057557 9.8606002170 0.2532948523
C -3.7851962271 10.1454519556 -0.7551860531
C -3.2943702506 9.0838379622 1.3334323974
C -5.0564760060 9.5854464110 -0.7408426951
C -4.5674448854 8.5375832412 1.3562526555
C -5.4581056886 8.7280078815 0.2922483134
C -6.6712657645 7.8878937176 0.2161747960
C -7.0003575140 7.2496183393 -0.9862885935
C -7.4097770991 7.5439985422 1.3567076048
```

|   |                |                |               |
|---|----------------|----------------|---------------|
| C | -7.9316429905  | 6.2214921473   | -1.0196711767 |
| C | -8.3490037704  | 6.5232717742   | 1.3202443708  |
| C | -8.5817828979  | 5.7931439900   | 0.1455164148  |
| C | -9.3159501220  | 4.5102654949   | 0.1544781572  |
| C | -9.9645233520  | 4.0031096989   | -0.9808308691 |
| C | -9.2237567232  | 3.6696372504   | 1.2721692527  |
| C | -10.3906483315 | 2.6825421970   | -1.0355018667 |
| C | -9.6551058718  | 2.3533577333   | 1.2204156354  |
| C | -10.1941747048 | 1.8125740410   | 0.0460896707  |
| C | -10.3511163741 | 0.3476543616   | -0.0700488834 |
| C | -9.9486812623  | -0.3031494533  | -1.2435216725 |
| C | -10.7147141886 | -0.4525376475  | 1.0223594703  |
| C | -9.7969445157  | -1.6814461214  | -1.2833403598 |
| C | -10.5658186040 | -1.8316680422  | 0.9812969717  |
| C | -10.0435529607 | -2.4709454479  | -0.1523851810 |
| C | -9.5784483075  | -3.8735086511  | -0.1180439653 |
| C | -9.5494052629  | -4.6860000108  | -1.2605872768 |
| C | -8.9743349835  | -4.3718744185  | 1.0438101430  |
| C | -8.8509404628  | -5.8857573448  | -1.2699442546 |
| C | -8.2767329275  | -5.5699972457  | 1.0345772161  |
| C | -8.1508380110  | -6.3266103623  | -0.1378264793 |
| H | -7.4972926565  | -8.1716676144  | 1.7992544891  |
| H | -5.5071952156  | -9.6066022691  | 1.8316324112  |
| H | -4.5779640972  | -8.4021232413  | -2.1799758242 |
| H | -6.5583659631  | -6.9696023710  | -2.2112964366 |
| H | -3.2432450750  | -9.0891653597  | 1.9880415810  |
| H | -0.8519805108  | -9.5926359702  | 2.0521221305  |
| H | -1.0238446614  | -10.9429829520 | -2.0170898417 |
| H | -3.4233854539  | -10.4335387095 | -2.0820695577 |
| H | 1.0238419771   | -10.9429837181 | 2.0170894969  |
| H | 3.4233827210   | -10.4335393526 | 2.0820698105  |
| H | 3.2432429829   | -9.0891666406  | -1.9880417804 |
| H | 0.8519782342   | -9.5926357522  | -2.0521219391 |
| H | 4.5779619021   | -8.4021239539  | 2.1799757676  |
| H | 6.5583641899   | -6.9696037716  | 2.2112965113  |
| H | 7.4972903677   | -8.1716692876  | -1.7992544875 |
| H | 5.5071928078   | -9.6066034087  | -1.8316322358 |
| H | 8.8271039204   | -6.4802464794  | 2.1792928029  |
| H | 10.0614022302  | -4.3611059170  | 2.1623512426  |
| H | 8.9635758342   | -3.7620181003  | -1.9423936766 |
| H | 7.7348079341   | -5.8728872021  | -1.9256997961 |
| H | 9.3814047382   | -2.1424412897  | 2.1746979759  |
| H | 9.6499797919   | 0.2881657397   | 2.1043428016  |
| H | 11.0934359126  | 0.0167077736   | -1.9263981976 |
| H | 10.8312781383  | -2.4227198446  | -1.8535886788 |
| H | 10.8624933654  | 2.3120631488   | 1.9416617388  |
| H | 10.1141903823  | 4.6447025621   | 1.8449818287  |
| H | 8.7129686720   | 4.0200156658   | -2.1640712104 |
| H | 9.4750423760   | 1.7039254548   | -2.0721606629 |
| H | 8.0792977531   | 5.6742069181   | 1.9460473274  |
| H | 6.4406854367   | 7.4893730111   | 1.8860620555  |
| H | 7.2225827360   | 8.0664406013   | -2.2909749004 |
| H | 8.8895937244   | 6.2662550690   | -2.2269627053 |
| H | 5.7427937631   | 9.8009789485   | 1.5556516690  |
| H | 3.5054402167   | 10.7959281136  | 1.5793313284  |
| H | 2.6003984584   | 8.8183313570   | -2.1248314626 |
| H | 4.8406095696   | 7.8650194887   | -2.1643951733 |
| H | 1.4089133355   | 10.2115718970  | 2.0255954935  |
| H | -1.0164806259  | 10.2831658148  | 2.2488431028  |
| H | -1.4089107792  | 10.2115722474  | -2.0255955950 |
| H | 1.0164832317   | 10.2831654818  | -2.2488429092 |
| H | -2.6003962645  | 8.8183316748   | 2.1248313152  |
| H | -4.8406077800  | 7.8650205315   | 2.1643952980  |
| H | -5.7427911502  | 9.8009800791   | -1.5556519768 |
| H | -3.5054374846  | 10.7959288194  | -1.5793311657 |
| H | -7.2225810713  | 8.0664428468   | 2.2909746200  |
| H | -8.8895923379  | 6.2662574742   | 2.2269629107  |
| H | -8.0792967419  | 5.6742091080   | -1.9460474376 |
| H | -6.4406837234  | 7.4893744950   | -1.8860618853 |
| H | -8.7129673671  | 4.0200175857   | 2.1640709453  |
| H | -9.4750423455  | 1.7039276911   | 2.0721608499  |
| H | -10.8624922664 | 2.3120657958   | -1.9416621602 |
| H | -10.1141892589 | 4.6447051675   | -1.8449815834 |

|   |                |               |               |
|---|----------------|---------------|---------------|
| H | -11.0934362963 | 0.0167105639  | 1.9263978823  |
| H | -10.8312785734 | -2.4227170835 | 1.8535888728  |
| H | -9.3814053936  | -2.1424389916 | -2.1746981253 |
| H | -9.6499795817  | 0.2881679844  | -2.1043426876 |
| H | -8.9635763643  | -3.7620156510 | 1.9423935356  |
| H | -7.7348093215  | -5.8728853185 | 1.9256998594  |
| H | -8.8271053337  | -6.4802440111 | -2.1792929256 |
| H | -10.0614031618 | -4.3611033299 | -2.1623511462 |

Cartesian coordinates (in Å) of [16]-cycloparaphenylene optimized at the PBE0/6-31G(d,p) level of theory:

```
C 5.4874082049 -9.4975652799 0.1735436229
C 4.9932803019 -10.0921056569 1.3432388962
C 4.6798735521 -9.5536689509 -0.9703004901
C 3.7102071824 -10.6198306236 1.3944726999
C 3.3998742867 -10.0836719511 -0.9201767712
C 2.8655229473 -10.5794738129 0.2761878505
C 1.4186886568 -10.8677701652 0.3624835018
C 0.6936532278 -10.4730806775 1.4943611408
C 0.6938581069 -11.3706650393 -0.7272845530
C -0.6936544335 -10.4730809278 1.4943612751
C -0.6938594291 -11.3706645684 -0.7272849290
C -1.4186897151 -10.8677700633 0.3624834256
C -2.8655239856 -10.5794735727 0.2761877624
C -3.7102084097 -10.6198304211 1.3944724769
C -3.3998754560 -10.0836710002 -0.9201765425
C -4.9932813580 -10.0921050126 1.3432387918
C -4.6798748490 -9.5536683404 -0.9703006195
C -5.4874092671 -9.4975646049 0.1735436057
C -6.7218013799 -8.6849990214 0.1593608397
C -7.0588633974 -7.9010799347 1.2707818280
C -7.4958612445 -8.5307106470 -0.9995213167
C -8.0471325670 -6.9307045444 1.1913708623
C -8.4804289551 -7.5561672005 -1.0812317715
C -8.7389093613 -6.6970160501 -0.0039634759
C -9.5559026739 -5.4745964551 -0.1522383154
C -10.3117042511 -4.9380752766 0.8991769170
C -9.4493574398 -4.7162034421 -1.3250294112
C -10.8491815912 -3.6602523054 0.8162377110
C -9.9785871599 -3.4372341354 -1.4040448400
C -10.6470289825 -2.8589087531 -0.3165420704
C -10.9511517246 -1.4123767217 -0.3288729074
C -10.8088175072 -0.6524840058 0.8399603456
C -11.2155355868 -0.7211058085 -1.5201839163
C -10.8145605166 0.7344690813 0.8007338532
C -11.2091942267 0.6658608734 -1.5622781016
C -10.9520890022 1.4227671669 -0.4110370850
C -10.6406491333 2.8658084555 -0.4739843662
C -10.9838411526 3.7608965726 0.5483400543
C -9.8212624906 3.3437032102 -1.5040439910
C -10.4518866812 5.0431569355 0.5875609097
C -9.2794016513 4.6184958094 -1.4565176040
C -9.5407580431 5.4827505556 -0.3842237066
C -8.7378291756 6.7137915450 -0.2240866657
C -8.3739734771 7.1646102474 1.0525143155
C -8.1645164792 7.3711569057 -1.3217440111
C -7.3995740648 8.1363180689 1.2228750277
C -7.1745026848 8.3283373719 -1.1512900410
C -6.7246693450 8.6899877452 0.1259699103
C -5.4803398022 9.4685434812 0.3007199346
C -4.6284760829 9.1657185645 1.3719361533
C -5.0220516234 10.3994742216 -0.6427845123
C -3.3519901109 9.6973337215 1.4497670992
C -3.7383783316 10.9263561415 -0.5698516832
C -2.8590585304 10.5521237406 0.4555776022
C -1.4171471235 10.8752280143 0.4413737945
C -0.6933656737 11.0414061202 1.6305492802
C -0.6944169446 10.8404287344 -0.7579218725
C 0.6933668173 11.0414057687 1.6305493276
C 0.6944183218 10.8404288168 -0.7579220117
C 1.4171482160 10.8752277984 0.4413738171
C 2.8590594396 10.5521228131 0.4555775527
C 3.3519912118 9.6973329542 1.4497670738
C 3.7383796946 10.9263557400 -0.5698512534
C 4.6284773968 9.1657182532 1.3719365027
C 5.0220527765 10.3994733749 -0.6427848306
C 5.4803407576 9.4685429110 0.3007199147
C 6.7246703355 8.6899871730 0.1259698640
C 7.3995751337 8.1363173695 1.2228748758
C 7.1745037373 8.3283364232 -1.1512899911
```

|   |                |                |               |
|---|----------------|----------------|---------------|
| C | 8.3739744026   | 7.1646094107   | 1.0525142158  |
| C | 8.1645174161   | 7.3711559077   | -1.3217442973 |
| C | 8.7378300368   | 6.7137907848   | -0.2240868126 |
| C | 9.5407588469   | 5.4827497246   | -0.3842238257 |
| C | 10.4518872201  | 5.0431557663   | 0.5875609232  |
| C | 9.2794021976   | 4.6184945079   | -1.4565173442 |
| C | 10.9838412028  | 3.7608951959   | 0.5483403911  |
| C | 9.8212631492   | 3.3437019840   | -1.5040442456 |
| C | 10.6406491864  | 2.8658072875   | -0.4739841825 |
| C | 10.9520892691  | 1.4227660616   | -0.4110369689 |
| C | 10.8145601170  | 0.7344677847   | 0.8007337893  |
| C | 11.2091947555  | 0.6658595777   | -1.5622778593 |
| C | 10.8088177278  | -0.6524853096  | 0.8399604172  |
| C | 11.2155350880  | -0.7211071297  | -1.5201841617 |
| C | 10.9511516560  | -1.4123778444  | -0.3288729866 |
| C | 10.6470287331  | -2.8589098432  | -0.3165421232 |
| C | 10.8491815301  | -3.6602536689  | 0.8162374354  |
| C | 9.9785865369   | -3.4372353639  | -1.4040446415 |
| C | 10.3117036029  | -4.9380763876  | 0.8991768758  |
| C | 9.4493570109   | -4.7162047756  | -1.3250297243 |
| C | 9.5559015745   | -5.4745971612  | -0.1522382227 |
| C | 8.7389085243   | -6.6970168458  | -0.0039633345 |
| C | 8.0471313384   | -6.9307052092  | 1.1913708281  |
| C | 8.4804281035   | -7.5561682330  | -1.0812314835 |
| C | 7.0588624330   | -7.9010808531  | 1.2707817768  |
| C | 7.4958600691   | -8.5307113966  | -0.9995215148 |
| C | 6.7218006128   | -8.6850001151  | 0.1593607996  |
| H | 5.6168476024   | -10.1215780065 | 2.2326732591  |
| H | 3.3487221743   | -11.0527891798 | 2.3233528004  |
| H | 2.7670043970   | -10.0228212671 | -1.8007835383 |
| H | 5.0219526018   | -9.0870929487  | -1.8894055735 |
| H | 1.2227091985   | -10.0663222830 | 2.3514081133  |
| H | -1.2227106618  | -10.0663225108 | 2.3514080715  |
| H | -1.2261262974  | -11.7457944456 | -1.5972474744 |
| H | 1.2261250991   | -11.7457946480 | -1.5972470832 |
| H | -3.3487238718  | -11.0527890217 | 2.3233527588  |
| H | -5.6168489188  | -10.1215773975 | 2.2326729401  |
| H | -5.0219536022  | -9.0870922875  | -1.8894057971 |
| H | -2.7670054508  | -10.0228203816 | -1.8007831783 |
| H | -6.4722039301  | -7.9836172845  | 2.1811140800  |
| H | -8.2162343440  | -6.2743618901  | 2.0403253094  |
| H | -9.0440488719  | -7.4429074147  | -2.0034344322 |
| H | -7.3052375873  | -9.1686037712  | -1.8581888900 |
| H | -10.4643116962 | -5.5233160821  | 1.8020874022  |
| H | -11.4171193922 | -3.2679528757  | 1.6553925542  |
| H | -9.7849673995  | -2.8415649256  | -2.2910940188 |
| H | -8.8565815502  | -5.0965624804  | -2.1519107226 |
| H | -10.5902988598 | -1.1522559022  | 1.7790604953  |
| H | -10.6050368652 | 1.2932974189   | 1.7085583480  |
| H | -11.3827657613 | 1.1735767199   | -2.5073195628 |
| H | -11.4018613901 | -1.2795349014  | -2.4333880979 |
| H | -11.6619409520 | 3.4400877871   | 1.3348370220  |
| H | -10.7323081121 | 5.7060904080   | 1.4014878438  |
| H | -8.5640196449  | 4.9103635564   | -2.2192569891 |
| H | -9.5234796114  | 2.6700062080   | -2.3025058115 |
| H | -8.8033619114  | 6.6924109304   | 1.9311550032  |
| H | -7.1222651931  | 8.4341775408   | 2.2299439653  |
| H | -6.6885700417  | 8.7451257609   | -2.0287738379 |
| H | -8.4610642504  | 7.0940288828   | -2.3292848211 |
| H | -4.9352844140  | 8.4299272672   | 2.1087488740  |
| H | -2.6894175046  | 9.3698780257   | 2.2454896168  |
| H | -3.4057875056  | 11.6280223029  | -1.3302659088 |
| H | -5.6738140630  | 10.7030166181  | -1.4575346307 |
| H | -1.2275298441  | 11.1430879170  | 2.5712902978  |
| H | 1.2275312263   | 11.1430870925  | 2.5712902666  |
| H | 1.2253949717   | 10.7066913093  | -1.6962812102 |
| H | -1.2253937633  | 10.7066912670  | -1.6962809464 |
| H | 2.6894188539   | 9.3698772417   | 2.2454898003  |
| H | 4.9352860309   | 8.4299268059   | 2.1087489295  |
| H | 5.6738150050   | 10.7030157377  | -1.4575351928 |
| H | 3.4057887680   | 11.6280219011  | -1.3302653706 |
| H | 7.1222667214   | 8.4341768806   | 2.2299439509  |
| H | 8.8033632837   | 6.6924101437   | 1.9311547001  |

|   |               |               |               |
|---|---------------|---------------|---------------|
| H | 8.4610649190  | 7.0940279413  | -2.3292852547 |
| H | 6.6885709295  | 8.7451249367  | -2.0287735738 |
| H | 10.7323089131 | 5.7060889611  | 1.4014879988  |
| H | 11.6619409679 | 3.4400859982  | 1.3348372161  |
| H | 9.5234803439  | 2.6700052647  | -2.3025063968 |
| H | 8.5640202973  | 4.9103625109  | -2.2192566371 |
| H | 10.6050367868 | 1.2932958621  | 1.7085585227  |
| H | 10.5902987975 | -1.1522574431 | 1.7790603708  |
| H | 11.4018612350 | -1.2795361328 | -2.4333883843 |
| H | 11.3827659772 | 1.1735755351  | -2.5073192686 |
| H | 11.4171193514 | -3.2679546833 | 1.6553924849  |
| H | 10.4643106903 | -5.5233173564 | 1.8020873064  |
| H | 8.8565810021  | -5.0965635651 | -2.1519111204 |
| H | 9.7849666656  | -2.8415658118 | -2.2910935173 |
| H | 8.2162330561  | -6.2743628286 | 2.0403255054  |
| H | 6.4722028223  | -7.9836184528 | 2.1811138840  |
| H | 7.3052366410  | -9.1686045264 | -1.8581891560 |
| H | 9.0440483602  | -7.4429085363 | -2.0034339065 |

Cartesian coordinates (in Å) of [17]-cycloparaphenylene optimized at the PBE0/6-31G(d,p) level of theory:

|   |                |                |               |
|---|----------------|----------------|---------------|
| C | 1.7946650097   | 11.4909343454  | -0.0281751616 |
| C | 2.6182216744   | 11.8516967829  | 1.0465190725  |
| C | 2.3849354366   | 10.7961829557  | -1.0917243104 |
| C | 3.9525977905   | 11.4668333310  | 1.0883917619  |
| C | 3.7117033367   | 10.4011406398  | -1.0430614370 |
| C | 4.5189043765   | 10.6917809401  | 0.0655212509  |
| C | 5.8510519128   | 10.0611548091  | 0.1822103545  |
| C | 6.3591968775   | 9.6722495268   | 1.4293298075  |
| C | 6.5834842422   | 9.6825469112   | -0.9516861671 |
| C | 7.4761186852   | 8.8555003338   | 1.5304666020  |
| C | 7.6851939728   | 8.8467895510   | -0.8518276484 |
| C | 8.1273472645   | 8.3667756506   | 0.3888717539  |
| C | 9.1162247302   | 7.2696566695   | 0.4628642828  |
| C | 9.0358091380   | 6.3239271011   | 1.4945226145  |
| C | 10.0566632744  | 7.0371317877   | -0.5519597583 |
| C | 9.7885820188   | 5.1600730497   | 1.4648294814  |
| C | 10.7968930366  | 5.8631806879   | -0.5926926756 |
| C | 10.6441102404  | 4.8786934951   | 0.3923857034  |
| C | 11.2017889107  | 3.5174755321   | 0.2497092739  |
| C | 11.6769607133  | 2.7856690949   | 1.3457613410  |
| C | 11.1048092805  | 2.8552011409   | -0.9802137590 |
| C | 11.9486517706  | 1.4287158513   | 1.2378726148  |
| C | 11.3591915169  | 1.4954236717   | -1.0825696522 |
| C | 11.7375837184  | 0.7386918782   | 0.0348705530  |
| C | 11.7375834411  | -0.7386937382  | -0.0348704320 |
| C | 11.3591911490  | -1.4954257174  | 1.0825695542  |
| C | 11.9486519286  | -1.4287180608  | -1.2378723143 |
| C | 11.1048085980  | -2.8552031678  | 0.9802139492  |
| C | 11.6769594707  | -2.7856709536  | -1.3457616142 |
| C | 11.2017877344  | -3.5174771433  | -0.2497093027 |
| C | 10.6441097021  | -4.8786953383  | -0.3923858951 |
| C | 10.7968924589  | -5.8631829031  | 0.5926920923  |
| C | 9.7885811731   | -5.1600750351  | -1.4648294575 |
| C | 10.0566620449  | -7.0371336741  | 0.5519599094  |
| C | 9.0358081300   | -6.3239289272  | -1.4945229423 |
| C | 9.1162235643   | -7.2696581066  | -0.4628641712 |
| C | 8.1273458283   | -8.3667768418  | -0.3888715476 |
| C | 7.6851923171   | -8.8467909078  | 0.8518276499  |
| C | 7.4761168863   | -8.8555015214  | -1.5304662509 |
| C | 6.5834824928   | -9.6825481654  | 0.9516864995  |
| C | 6.3591951712   | -9.6722508203  | -1.4293297667 |
| C | 5.8510503934   | -10.0611559483 | -0.1822101248 |
| C | 4.5189026770   | -10.6917816906 | -0.0655211644 |
| C | 3.7117012749   | -10.4011411173 | 1.0430611467  |
| C | 3.9525956984   | -11.4668340642 | -1.0883915549 |
| C | 2.38493333129  | -10.7961833209 | 1.0917242996  |
| C | 2.6182194597   | -11.8516970154 | -1.0465192830 |
| C | 1.7946629572   | -11.4909344673 | 0.0281750411  |
| C | 0.3275886092   | -11.6678215977 | 0.0163154029  |
| C | -0.3876919148  | -11.9258758878 | 1.1939370040  |
| C | -0.4088928581  | -11.4053209121 | -1.1458000089 |
| C | -1.7693282557  | -11.8112916755 | 1.2326438843  |
| C | -1.7915474850  | -11.2848911208 | -1.1055029115 |
| C | -2.4964166049  | -11.4276879435 | 0.0965796509  |
| C | -3.9116969723  | -11.0115226214 | 0.1879606182  |
| C | -4.3483087257  | -10.3150787824 | 1.3226276943  |
| C | -4.8140045861  | -11.1425525630 | -0.8770369517 |
| C | -5.5890162230  | -9.6994323909  | 1.3555955449  |
| C | -6.0585391616  | -10.5265207841 | -0.8433305289 |
| C | -6.4554478716  | -9.7516120690  | 0.2556455389  |
| C | -7.6484622500  | -8.8797464492  | 0.2301537424  |
| C | -8.3383312757  | -8.5432364272  | 1.4037705809  |
| C | -8.0235682165  | -8.2259162952  | -0.9508642436 |
| C | -9.2700383954  | -7.5157279629  | 1.4182713375  |
| C | -8.9616086290  | -7.2028869830  | -0.9383256777 |
| C | -9.5595705961  | -6.7854592449  | 0.2574872071  |
| C | -10.3112468754 | -5.5144786207  | 0.3073081490  |
| C | -10.0651495080 | -4.6195306210  | 1.3562813232  |
| C | -11.1500830555 | -5.0822271887  | -0.7283732417 |

|   |                |                |               |
|---|----------------|----------------|---------------|
| C | -10.5525670065 | -3.3230347932  | 1.3235454028  |
| C | -11.6501705726 | -3.7863962409  | -0.7533018965 |
| C | -11.3217392451 | -2.8597342262  | 0.2471913558  |
| C | -11.6163511017 | -1.4162079914  | 0.1265033325  |
| C | -11.6857694065 | -0.5840856731  | 1.2527686378  |
| C | -11.6733393573 | -0.7971586599  | -1.1299704254 |
| C | -11.6733394913 | 0.7971607940   | 1.1299705737  |
| C | -11.6857690998 | 0.5840877623   | -1.2527687601 |
| C | -11.6163503955 | 1.4162098048   | -0.1265032316 |
| C | -11.3217389118 | 2.8597360915   | -0.2471913800 |
| C | -11.6501701422 | 3.7863984475   | 0.7533015382  |
| C | -10.5525662389 | 3.3230368075   | -1.3235451185 |
| C | -11.1500821639 | 5.0822292667   | 0.7283734554  |
| C | -10.0651489405 | 4.6195326613   | -1.3562816204 |
| C | -10.3112461426 | 5.5144803669   | -0.3073081134 |
| C | -9.5595691600  | 6.7854605608   | -0.2574871130 |
| C | -8.9616070194  | 7.2028884338   | 0.9383255452  |
| C | -9.2700370871  | 7.5157297202   | -1.4182710957 |
| C | -8.0235665624  | 8.2259177321   | 0.9508644526  |
| C | -8.3383293251  | 8.5432375761   | -1.4037708122 |
| C | -7.6484607362  | 8.8797476390   | -0.2301536529 |
| C | -6.4554464202  | 9.7516133307   | -0.2556454860 |
| C | -6.0585374713  | 10.5265223961  | 0.8433302028  |
| C | -5.5890144407  | 9.6994335089   | -1.355952627  |
| C | -4.8140024534  | 11.1425532946  | 0.8770372672  |
| C | -4.3483069655  | 10.3150799016  | -1.3226278705 |
| C | -3.9116953187  | 11.0115236501  | -0.1879606226 |
| C | -2.4964147105  | 11.4276880409  | -0.0965796189 |
| C | -1.7915453873  | 11.2848912745  | 1.1055027904  |
| C | -1.7693262277  | 11.8112920607  | -1.2326437592 |
| C | -0.4088907045  | 11.4053208259  | 1.1457999678  |
| C | -0.3876898349  | 11.9258754193  | -1.1939372643 |
| C | 0.3275906334   | 11.6678212457  | -0.0163155574 |
| H | 2.2034979465   | 12.4334501109  | 1.8654850831  |
| H | 4.5618976081   | 11.7608098401  | 1.9385572548  |
| H | 4.1034298246   | 9.7802530628   | -1.8426292632 |
| H | 1.7673938522   | 10.4830325293  | -1.9285266264 |
| H | 5.8306300275   | 9.9538725638   | 2.3354733555  |
| H | 7.8204910045   | 8.5564980957   | 2.5162022700  |
| H | 8.1667054991   | 8.5041529891   | -1.7628329271 |
| H | 6.2593163548   | 10.0108012658  | -1.9349518295 |
| H | 8.3064383849   | 6.4565380157   | 2.2874167026  |
| H | 9.6411505532   | 4.4089709589   | 2.2354984111  |
| H | 11.4942361469  | 5.6965519077   | -1.4093414741 |
| H | 10.1948500691  | 7.7770334211   | -1.3351198501 |
| H | 11.8174874436  | 3.2853296815   | 2.3006379140  |
| H | 12.3088064925  | 0.8912960368   | 2.1105716611  |
| H | 11.1698101774  | 0.9966748175   | -2.0282883731 |
| H | 10.7284841520  | 3.3935486134   | -1.8455720930 |
| H | 11.1698098707  | -0.9966768159  | 2.0282882192  |
| H | 10.7284835818  | -3.3935507562  | 1.8455723049  |
| H | 11.8174865772  | -3.2853317839  | -2.3006380694 |
| H | 12.3088062951  | -0.8912983380  | -2.1105714993 |
| H | 11.4942354919  | -5.6965542963  | 1.4093409156  |
| H | 10.1948486892  | -7.7770353926  | 1.3351200292  |
| H | 8.3064374765   | -6.4565398702  | -2.2874171499 |
| H | 9.6411493344   | -4.4089727539  | -2.2354980758 |
| H | 8.1667037008   | -8.5041542817  | 1.7628329366  |
| H | 6.2593145069   | -10.0108025243 | 1.9349521530  |
| H | 5.8306283851   | -9.9538739676  | -2.3354733432 |
| H | 7.8204892245   | -8.5564994863  | -2.5162019364 |
| H | 4.1034277121   | -9.7802535281  | 1.8426289419  |
| H | 1.7673917900   | -10.4830330899 | 1.9285267542  |
| H | 2.2034956251   | -12.4334502770 | -1.8654853068 |
| H | 4.5618953855   | -11.7608107129 | -1.9385570285 |
| H | 0.1522408884   | -12.1956968887 | 2.0975846873  |
| H | -2.2938824127  | -11.9975288226 | 2.1658106660  |
| H | -2.3224139543  | -10.9782078679 | -2.0022551097 |
| H | 0.1168617108   | -11.1933756596 | -2.0726772412 |
| H | -3.6671766615  | -10.1752677746 | 2.1567908837  |
| H | -5.8533505139  | -9.0897524916  | 2.2144835668  |
| H | -6.7288989331  | -10.6344859213 | -1.6918111537 |
| H | -4.5305979500  | -11.7227535585 | -1.7511592720 |



|   |                |               |               |
|---|----------------|---------------|---------------|
| H | -8.1213543067  | -9.0789273502 | 2.3237929651  |
| H | -9.7672701928  | -7.2566477137 | 2.3491624882  |
| H | -9.1600016243  | -6.6512836258 | -1.8531219179 |
| H | -7.5024687429  | -8.4545408803 | -1.8761703537 |
| H | -9.4017286534  | -4.9156643425 | 2.1639244050  |
| H | -10.2524298078 | -2.6327913673 | 2.1059850977  |
| H | -12.2935049021 | -3.4854399621 | -1.5756264324 |
| H | -11.4053516926 | -5.7673777167 | -1.5326408083 |
| H | -11.7033269868 | -1.0238776258 | 2.2457392990  |
| H | -11.6340052990 | 1.4041572792  | 2.0296743660  |
| H | -11.7033262590 | 1.0238797410  | -2.2457394602 |
| H | -11.6340052561 | -1.4041550918 | -2.0296741953 |
| H | -12.2935046692 | 3.4854423635  | 1.5756259586  |
| H | -11.4053506068 | 5.7673798465  | 1.5326411019  |
| H | -9.4017280517  | 4.9156663208  | -2.1639247465 |
| H | -10.2524290860 | 2.6327934328  | -2.1059847912 |
| H | -9.1600000385  | 6.6512851278  | 1.8531217900  |
| H | -7.5024671128  | 8.4545424204  | 1.8761705836  |
| H | -8.1213522563  | 9.0789285246  | -2.3237932207 |
| H | -9.7672686962  | 7.2566494588  | -2.3491622932 |
| H | -6.7288970461  | 10.6344875476 | 1.6918109102  |
| H | -4.5305956637  | 11.7227544676 | 1.7511594736  |
| H | -3.6671748824  | 10.1752687706 | -2.1567910386 |
| H | -5.8533487172  | 9.0897536733  | -2.2144832976 |
| H | -2.3224118296  | 10.9782080204 | 2.0022549670  |
| H | 0.1168638679   | 11.1933758363 | 2.0726772804  |
| H | 0.1522430893   | 12.1956964906 | -2.0975848743 |
| H | -2.2938802906  | 11.9975293243 | -2.1658105387 |

Cartesian coordinates (in Å) of [18]-cycloparaphenylene optimized at the PBE0/6-31G(d,p) level of theory:

|   |                |               |               |
|---|----------------|---------------|---------------|
| C | 12.2987474806  | -1.4189419283 | 0.0249974404  |
| C | 12.7138718747  | -0.6940925655 | -1.1009487825 |
| C | 11.9796948717  | -0.6935048702 | 1.1801770968  |
| C | 12.7138832847  | 0.6938729346  | -1.1009492336 |
| C | 11.9797070419  | 0.6932978404  | 1.1801770677  |
| C | 12.2987720434  | 1.4187293061  | 0.0249973168  |
| C | 12.0416855299  | 2.8728084559  | -0.0267192378 |
| C | 11.4885166737  | 3.4434967270  | -1.1802844803 |
| C | 12.1888107915  | 3.6976574567  | 1.0972845129  |
| C | 11.0149454669  | 4.7469596959  | -1.1800742090 |
| C | 11.7141607876  | 5.0020572267  | 1.0977382805  |
| C | 11.0712579613  | 5.5396065072  | -0.0259629476 |
| C | 10.3322997520  | 6.8179612784  | 0.0260723777  |
| C | 10.1884653218  | 7.6428308815  | -1.0979278766 |
| C | 9.6175631776   | 7.1648864219  | 1.1800106298  |
| C | 9.2966674450   | 8.7066264116  | -1.0985481215 |
| C | 8.7266870013   | 8.2278063042  | 1.1793746234  |
| C | 8.5091114677   | 8.9919666909  | 0.0255530570  |
| C | 7.3776144454   | 9.9409802190  | -0.0258782250 |
| C | 6.5893144372   | 10.0278597364 | -1.1807151242 |
| C | 6.9581360410   | 10.6621640407 | 1.1007914502  |
| C | 5.3888502699   | 10.7223285302 | -1.1792269049 |
| C | 5.7564947808   | 11.3566131769 | 1.1024024017  |
| C | 4.9207606476   | 11.3605815688 | -0.0232693396 |
| C | 3.5328739298   | 11.8651296935 | 0.0288649877  |
| C | 2.8928244938   | 12.4048262689 | -1.0956276086 |
| C | 2.7613965146   | 11.6705068365 | 1.1819321675  |
| C | 1.5258500614   | 12.6452494364 | -1.0965643421 |
| C | 1.3955183358   | 11.9112793901 | 1.1812157699  |
| C | 0.7384518023   | 12.3570733940 | 0.0268842044  |
| C | -0.7382380305  | 12.3570865648 | -0.0268843724 |
| C | -1.3953125605  | 11.9113030389 | -1.1812155117 |
| C | -1.5256315151  | 12.6452762705 | 1.0965639541  |
| C | -2.7611949728  | 11.6705548272 | -1.1819324051 |
| C | -2.8926100202  | 12.4048760734 | 1.0956278528  |
| C | -3.5326686879  | 11.8651910151 | -0.0288649810 |
| C | -4.9205640505  | 11.3606667025 | 0.0232694048  |
| C | -5.7562987364  | 11.3567128117 | -1.1024021331 |
| C | -5.3886649366  | 10.7224215269 | 1.1792267156  |
| C | -6.9579514880  | 10.6622837870 | -1.1007917308 |
| C | -6.5891412380  | 10.0279737803 | 1.1807154760  |
| C | -7.3774421574  | 9.9411074018  | 0.0258781786  |
| C | -8.5089560616  | 8.9921140349  | -0.0255529185 |
| C | -8.7265447612  | 8.2279568355  | -1.1793742402 |
| C | -9.2965171558  | 8.7067872476  | 1.0985479820  |
| C | -9.6174396959  | 7.1650528057  | -1.1800106838 |
| C | -10.1883331391 | 7.6430069326  | 1.0979283252  |
| C | -10.3321820920 | 6.8181402244  | -0.0260721452 |
| C | -11.0711620086 | 5.5397979916  | 0.0259630160  |
| C | -11.7140745820 | 5.0022597307  | -1.0977380127 |
| C | -11.0148631762 | 4.7471497537  | 1.1800739698  |
| C | -12.1887464298 | 3.6978679807  | -1.0972849522 |
| C | -11.4884576172 | 3.4436952370  | 1.1802846431  |
| C | -12.0416356248 | 2.8730166995  | 0.0267190782  |
| C | -12.2987479489 | 1.4189421115  | -0.0249974420 |
| C | -11.9796945177 | 0.6935047625  | -1.1801767349 |
| C | -12.7138718162 | 0.6940926728  | 1.1009488653  |
| C | -11.9797068648 | -0.6932979172 | -1.1801770085 |
| C | -12.7138834304 | -0.6938728712 | 1.1009491630  |
| C | -12.2987720592 | -1.4187293010 | -0.0249972249 |
| C | -12.0416851959 | -2.8728083692 | 0.0267192570  |
| C | -12.1888108269 | -3.6976575532 | -1.0972843708 |
| C | -11.4885167234 | -3.4434966249 | 1.1802846285  |
| C | -11.7141603629 | -5.0020571258 | -1.0977384487 |
| C | -11.0149457530 | -4.7469597122 | 1.1800742944  |
| C | -11.0712579235 | -5.5396064903 | 0.0259630435  |
| C | -10.3323001709 | -6.8179615502 | -0.0260723886 |
| C | -9.6175631554  | -7.1648865283 | -1.1800104920 |
| C | -10.1884653600 | -7.6428308165 | 1.0979279963  |

|   |                |                |               |
|---|----------------|----------------|---------------|
| C | -8.7266869314  | -8.2278063228  | -1.1793746205 |
| C | -9.2966677268  | -8.7066265988  | 1.0985479786  |
| C | -8.5091114754  | -8.9919666858  | -0.0255529645 |
| C | -7.3776141240  | -9.9409797919  | 0.0258781764  |
| C | -6.9581359740  | -10.6621641138 | -1.1007913256 |
| C | -6.5893143893  | -10.0278595337 | 1.1807151715  |
| C | -5.7564946012  | -11.3566129870 | -1.1024025403 |
| C | -5.3888503182  | -10.7223285608 | 1.1792268713  |
| C | -4.9207606428  | -11.3605816160 | 0.0232694029  |
| C | -3.5328740524  | -11.8651301629 | -0.0288649982 |
| C | -2.7613964677  | -11.6705069840 | -1.1819320721 |
| C | -2.8928245423  | -12.4048261063 | 1.0956278077  |
| C | -1.3955182792  | -11.9112792621 | -1.1812157535 |
| C | -1.5258501313  | -12.6452496396 | 1.0965642301  |
| C | -0.7384518266  | -12.3570735120 | -0.0268841974 |
| C | 0.7382379872   | -12.3570861922 | 0.0268843183  |
| C | 1.5256316269   | -12.6452764573 | -1.0965638173 |
| C | 1.3953124043   | -11.9113029622 | 1.1812155687  |
| C | 2.8926099989   | -12.4048756751 | -1.0956280396 |
| C | 2.7611949143   | -11.6705550939 | 1.1819324606  |
| C | 3.5326686611   | -11.8651909504 | 0.0288650379  |
| C | 4.9205642202   | -11.3606671010 | -0.0232694093 |
| C | 5.3886650585   | -10.7224214872 | -1.1792265690 |
| C | 5.7562986396   | -11.3567127987 | 1.1024022577  |
| C | 6.5891412701   | -10.0279736684 | -1.1807154484 |
| C | 6.9579516399   | -10.6622841319 | 1.1007915900  |
| C | 7.3774421792   | -9.9411074332  | -0.0258780718 |
| C | 8.5089557123   | -8.9921136495  | 0.0255528964  |
| C | 9.2965172983   | -8.7067872409  | -1.0985478156 |
| C | 8.7265445869   | -8.2279567672  | 1.1793743138  |
| C | 10.1883329744  | -7.6430067249  | -1.0979284601 |
| C | 9.6174397399   | -7.1650528733  | 1.1800106295  |
| C | 10.3321821742  | -6.8181402143  | 0.0260722002  |
| C | 11.0711624720  | -5.5397982148  | -0.0259630660 |
| C | 11.0148635273  | -4.7471499363  | -1.1800740644 |
| C | 11.7140742861  | -5.0022596915  | 1.0977382279  |
| C | 11.4884573491  | -3.4436952254  | -1.1802846509 |
| C | 12.1887467157  | -3.6978681107  | 1.0972845930  |
| C | 12.0416354660  | -2.8730165414  | -0.0267191520 |
| H | 11.6367796992  | -1.2228178879  | 2.0644405654  |
| H | 11.6368007856  | 1.2226170644   | 2.0644402456  |
| H | 13.0251261012  | 1.2268259999   | -1.9953278745 |
| H | 13.0251047166  | -1.2270512655  | -1.9953275564 |
| H | 12.6681380789  | 3.3046928638   | 1.9898101944  |
| H | 11.8291700968  | 5.6109555189   | 1.9904493852  |
| H | 10.5080046046  | 5.1256901418   | -2.0629641876 |
| H | 11.3429834424  | 2.8273192236   | -2.0628760552 |
| H | 9.6925300797   | 6.5369552824   | 2.0630950837  |
| H | 8.1203774549   | 8.4113609021   | 2.0617064568  |
| H | 9.1969645942   | 9.3179720309   | -1.9913215810 |
| H | 10.7735962439  | 7.4362843453   | -1.9899190347 |
| H | 7.5763274549   | 10.6652671026  | 1.9944503245  |
| H | 5.4519142798   | 11.8928763137  | 1.9970850419  |
| H | 4.7584412528   | 10.6915043158  | -2.0632311450 |
| H | 6.8756924316   | 9.4666058544   | -2.0654504995 |
| H | 3.2228906624   | 11.2371814423  | 2.0645930250  |
| H | 0.8127111131   | 11.6621097508  | 2.0633508228  |
| H | 1.0559220727   | 13.0490798931  | -1.9892557267 |
| H | 3.4737103972   | 12.6245434474  | -1.9873232865 |
| H | -1.0556966510  | 13.0490986985  | 1.9892553910  |
| H | -3.4734922423  | 12.6246032534  | 1.9873234433  |
| H | -3.2226966902  | 11.2372373990  | -2.0645931816 |
| H | -0.8125098044  | 11.6621234812  | -2.0633507198 |
| H | -4.7582563782  | 10.6915864891  | 2.0632309956  |
| H | -6.8755287797  | 9.4667245110   | 2.0654506756  |
| H | -7.5761429604  | 10.6653972694  | -1.9944505176 |
| H | -5.4517088998  | 11.8929703534  | -1.9970849832 |
| H | -9.1968037379  | 9.3181314206   | 1.9913213043  |
| H | -10.7734679990 | 7.4364706116   | 1.9899192222  |
| H | -9.6924178190  | 6.5371229949   | -2.0630951066 |
| H | -8.1202323965  | 8.4115011047   | -2.0617063157 |
| H | -10.5079156768 | 5.1258712932   | 2.0629640019  |
| H | -11.3429351099 | 2.8275150848   | 2.0628761519  |

|   |                |                |               |
|---|----------------|----------------|---------------|
| H | -12.6680805174 | 3.3049117308   | -1.9898106105 |
| H | -11.8290729616 | 5.6111599831   | -1.9904492209 |
| H | -13.0251052912 | 1.2270511115   | 1.9953275945  |
| H | -13.0251261087 | -1.2268261294  | 1.9953277105  |
| H | -11.6368007066 | -1.2226168345  | -2.0644403919 |
| H | -11.6367795661 | 1.2228179170   | -2.0644401664 |
| H | -11.3429836180 | -2.8273194176  | 2.0628764622  |
| H | -10.5080043497 | -5.1256902299  | 2.0629639252  |
| H | -11.8291698851 | -5.6109552432  | -1.9904496620 |
| H | -12.6681376193 | -3.3046925806  | -1.9898101122 |
| H | -10.7735964675 | -7.4362847091  | 1.9899191743  |
| H | -9.1969647584  | -9.3179724813  | 1.9913212211  |
| H | -8.1203778077  | -8.4113608780  | -2.0617067609 |
| H | -9.6925303395  | -6.5369552752  | -2.0630948021 |
| H | -6.8756920996  | -9.4666056307  | 2.0654506569  |
| H | -4.7584409856  | -10.6915043378 | 2.0632308870  |
| H | -5.4519143336  | -11.8928759577 | -1.9970853858 |
| H | -7.5763274244  | -10.6652667861 | -1.9944501388 |
| H | -3.4737103217  | -12.6245437079 | 1.9873234957  |
| H | -1.0559218727  | -13.0490798992 | 1.9892555473  |
| H | -0.8127113585  | -11.6621096992 | -2.0633510269 |
| H | -3.2228908279  | -11.2371816320 | -2.0645928173 |
| H | 0.8125098631   | -11.6621235644 | 2.0633509875  |
| H | 3.2226967888   | -11.2372372140 | 2.0645929273  |
| H | 3.4734920979   | -12.6246031814 | -1.9873236561 |
| H | 1.0556964930   | -13.0490982483 | -1.9892553677 |
| H | 5.4517092149   | -11.8929706942 | 1.9970850699  |
| H | 7.5761433115   | -10.6653975076 | 1.9944502180  |
| H | 6.8755287726   | -9.4667248745  | -2.0654509672 |
| H | 4.7582562507   | -10.6915865135 | -2.0632306409 |
| H | 8.1202323107   | -8.4115007434  | 2.0617065410  |
| H | 9.6924178151   | -6.5371226852  | 2.0630947896  |
| H | 10.7734675582  | -7.4364705635  | -1.9899196001 |
| H | 9.1968034092   | -9.3181312986  | -1.9913211214 |
| H | 11.8290730071  | -5.6111598085  | 1.9904495057  |
| H | 12.6680806999  | -3.3049116323  | 1.9898101927  |
| H | 11.3429349610  | -2.8275154080  | -2.0628763894 |
| H | 10.5079159442  | -5.1258716884  | -2.0629639220 |

Cartesian coordinates (in Å) of [5]-paraphenylene optimized at the PBE0/6-31G(d,p) level of theory:

|   |                |               |               |
|---|----------------|---------------|---------------|
| C | 10.0210875954  | 0.0000557216  | -0.0001826085 |
| C | 9.3194365380   | 1.1560225837  | 0.3313421951  |
| C | 9.3194703838   | -1.1560592363 | -0.3312657882 |
| C | 7.9293715554   | 1.1560433365  | 0.3302721419  |
| C | 7.9294000904   | -1.1562461994 | -0.3297799945 |
| C | 7.2098503625   | -0.0000929442 | 0.0001908283  |
| C | 5.7314738499   | -0.0000357129 | 0.0000185761  |
| C | 5.0070580149   | 0.7262752750  | 0.9537387285  |
| C | 5.0071758320   | -0.7262867944 | -0.9538430758 |
| C | 3.6195550192   | 0.7262762194  | 0.9538882804  |
| C | 3.6196646802   | -0.7261611054 | -0.9542768705 |
| C | 2.8954522372   | 0.0001735002  | -0.0003239557 |
| C | 1.4182872274   | 0.0000732975  | -0.0002034336 |
| C | 0.6940213647   | -0.0101091566 | 1.1986898537  |
| C | 0.6938133789   | 0.0099808769  | -1.1989637300 |
| C | -0.6936178712  | -0.0103671154 | 1.1988122311  |
| C | -0.6938218116  | 0.0102346523  | -1.1988044709 |
| C | -1.4181560468  | 0.0000742437  | 0.0000616644  |
| C | -2.8953691457  | 0.0000370229  | 0.0001152494  |
| C | -3.6196760092  | -0.7373134836 | 0.9455479335  |
| C | -3.6196213690  | 0.7375520097  | -0.9452591759 |
| C | -5.0071607392  | -0.7369120047 | 0.9455914933  |
| C | -5.0071232770  | 0.7369168823  | -0.9455741419 |
| C | -5.7315377540  | -0.0002356539 | -0.0001899594 |
| C | -7.2099499913  | -0.0000392209 | 0.0000328533  |
| C | -7.9294763367  | -1.1603877423 | 0.3150009454  |
| C | -7.9294322149  | 1.1603792280  | -0.3147110710 |
| C | -9.3195565038  | -1.1602609498 | 0.3162681600  |
| C | -9.3195072984  | 1.1603593940  | -0.3158280464 |
| C | -10.0211564071 | -0.0000310164 | -0.0001215982 |
| H | 5.5411570994   | -1.2844472449 | -1.7178260057 |
| H | 3.0852362761   | -1.3127576041 | -1.6962974461 |
| H | 3.0849998293   | 1.3129847733  | 1.6957203247  |
| H | 5.5409011776   | 1.2844166546  | 1.7178286765  |
| H | 7.3906341287   | -2.0708476041 | -0.5613304272 |
| H | 9.8571802172   | -2.0658523606 | -0.5828977082 |
| H | 11.1071465158  | 0.0000756066  | -0.0001382629 |
| H | 9.8570863839   | 2.0658253570  | 0.5830516547  |
| H | 7.3905675251   | 2.0706366026  | 0.5617491715  |
| H | 1.2272022312   | 0.0360803086  | -2.1450651813 |
| H | 1.2276113309   | -0.0360856519 | 2.1446866917  |
| H | -1.2273118684  | -0.0003040541 | -2.1451484641 |
| H | -1.2268992195  | -0.0000409133 | 2.1452743981  |
| H | -3.0852903316  | 1.3324818837  | -1.6806308835 |
| H | -3.0853606930  | -1.3321759012 | 1.6809838708  |
| H | -5.5409977505  | 1.3040056969  | -1.7029937278 |
| H | -5.5411087815  | -1.3040844718 | 1.7028939755  |
| H | -7.3906589660  | -2.0778678494 | 0.5347181126  |
| H | -7.3905498174  | 2.0778989302  | -0.5340989012 |
| H | -9.8572581477  | -2.0732246975 | 0.5561449579  |
| H | -9.8571987835  | 2.0733777741  | -0.5555131493 |
| H | -11.1072235403 | -0.0000371599 | -0.0001751043 |

Cartesian coordinates (in Å) of [6]-paraphenylene optimized at the PBE0/6-31G(d,p) level of theory:

|   |               |               |                |
|---|---------------|---------------|----------------|
| C | 0.0000001743  | -0.0000057790 | -12.1808226455 |
| C | 1.2014783946  | 0.0504366984  | -11.4792667831 |
| C | -1.2014788388 | -0.0504265496 | -11.4792666619 |
| C | 1.2011677003  | 0.0517536638  | -10.0888906068 |
| C | -1.2011670093 | -0.0517604356 | -10.0888905963 |
| C | 0.0000002077  | 0.0000021150  | -9.3695111909  |
| C | -0.0000003484 | -0.0000006404 | -7.8908033264  |
| C | 0.9812812043  | -0.6883520628 | -7.1662043774  |
| C | -0.9812803040 | 0.6883531570  | -7.1662042277  |
| C | 0.9814813222  | -0.6883492141 | -5.7786277097  |
| C | -0.9814818770 | 0.6883483013  | -5.7786273839  |
| C | 0.0000001957  | 0.0000002100  | -5.0537871455  |
| C | 0.00000021725 | 0.0000009557  | -3.5766229470  |
| C | 0.3761828163  | -1.1380868207 | -2.8512016237  |
| C | -0.3761899399 | 1.1380848754  | -2.8512013969  |
| C | 0.3768683048  | -1.1378872780 | -1.4638497098  |
| C | -0.3768610701 | 1.1378901498  | -1.4638494631  |
| C | -0.0000024817 | -0.0000005793 | -0.7385807623  |
| C | -0.0000010266 | 0.0000000913  | 0.7385811432   |
| C | -0.3768620892 | -1.1378900336 | 1.4638495802   |
| C | 0.3768664648  | 1.1378879376  | 1.4638496110   |
| C | -0.3761905949 | -1.1380846385 | 2.8512013960   |
| C | 0.3761831982  | 1.1380870283  | 2.8512016151   |
| C | 0.0000030704  | -0.0000010601 | 3.5766230807   |
| C | -0.0000010271 | 0.0000018485  | 5.0537871859   |
| C | -0.9814804236 | -0.6883499824 | 5.7786278476   |
| C | 0.9814831625  | 0.6883468727  | 5.7786276583   |
| C | -0.9812813436 | -0.6883522348 | 7.1662045267   |
| C | 0.9812805114  | 0.6883530827  | 7.1662044836   |
| C | -0.0000000834 | 0.0000000824  | 7.8908033599   |
| C | 0.0000001206  | -0.0000027912 | 9.3695112129   |
| C | -1.2011670325 | 0.0517615541  | 10.0888906016  |
| C | 1.2011676908  | -0.0517525952 | 10.0888906467  |
| C | -1.2014789563 | 0.0504248871  | 11.4792666796  |
| C | 1.2014782691  | -0.0504379843 | 11.4792668169  |
| C | 0.0000001502  | 0.00000066545 | 12.1808226819  |
| H | 0.6551747006  | 2.0429068212  | 3.3839070282   |
| H | 0.6925265941  | 2.0305403711  | 0.9311766251   |
| H | -0.6925258883 | -2.0305413635 | 0.9311767782   |
| H | -0.6551735413 | -2.0429066475 | 3.3839074415   |
| H | 1.7669063663  | 1.2172946636  | 5.2459823690   |
| H | 1.7457472023  | 1.2459696358  | 7.7000884005   |
| H | -1.7457482258 | -1.2459690626 | 7.7000880164   |
| H | -1.7669060952 | -1.2172934917 | 5.2459821085   |
| H | -0.6925274372 | 2.0305406322  | -0.9311768517  |
| H | 0.6925262554  | -2.0305407035 | -0.9311773875  |
| H | -0.6551736123 | 2.0429066950  | -3.3839074307  |
| H | 0.6551738744  | -2.0429064231 | -3.3839074631  |
| H | -1.7669063988 | 1.2172943690  | -5.2459823506  |
| H | 1.7669058598  | -1.2172946360 | -5.2459822873  |
| H | -1.7457478122 | 1.2459685877  | -7.7000881890  |
| H | 1.7457473742  | -1.2459692355 | -7.7000883874  |
| H | 2.1422574625  | 0.1208023706  | -9.5504775715  |
| H | -2.1422571410 | -0.1208012593 | -9.5504774642  |
| H | 2.1442909406  | 0.0993106400  | -12.0166301282 |
| H | -2.1442909183 | -0.0993115140 | -12.0166298342 |
| H | -0.0000001240 | 0.0000005116  | -13.2669089380 |
| H | 2.1422572944  | -0.1208024773 | 9.5504774724   |
| H | -2.1422572789 | 0.1208010051  | 9.5504775422   |
| H | 2.1442909376  | -0.0993104913 | 12.0166300755  |
| H | -2.1442909122 | 0.0993118920  | 12.0166298846  |
| H | -0.0000001598 | -0.0000003728 | 13.2669089718  |

Cartesian coordinates (in Å) of [7]-paraphenylene optimized at the PBE0/6-31G(d,p) level of theory:

|   |                |                |               |
|---|----------------|----------------|---------------|
| C | 14.3375653559  | 0.0000014078   | 0.0000036941  |
| C | 13.6359620055  | -1.1180077600  | 0.4431794932  |
| C | 13.6359620363  | 1.1180051836   | -0.4431859383 |
| C | 12.2458053581  | -1.1175835449  | 0.4436346225  |
| C | 12.2458052650  | 1.1175857730   | -0.4436297496 |
| C | 11.5265093836  | -0.0000005214  | -0.0000018787 |
| C | 10.0479087653  | -0.0000002285  | 0.0000009775  |
| C | 9.3232671242   | -1.1514567870  | -0.3330393411 |
| C | 9.3232672614   | 1.1514573590   | 0.3330375288  |
| C | 7.9357682321   | -1.1517533268  | -0.3325375567 |
| C | 7.9357685180   | 1.1517529190   | 0.3325390631  |
| C | 7.2107202426   | 0.0000001840   | -0.0000005158 |
| C | 5.7334346867   | 0.0000008669   | -0.0000006779 |
| C | 5.0085294841   | -0.7221224472  | -0.9569812765 |
| C | 5.0085296740   | 0.7221197868   | 0.9569832472  |
| C | 3.6210804821   | -0.7221876576  | -0.9569512202 |
| C | 3.6210807515   | 0.7221906968   | 0.9569488563  |
| C | 2.8962243756   | -0.0000015753  | 0.0000011292  |
| C | 1.4188262056   | 0.0000015676   | -0.0000000803 |
| C | 0.6938336054   | 0.0001314575   | -1.1986639157 |
| C | 0.6938337075   | -0.0001338155  | 1.1986639798  |
| C | -0.6938335940  | -0.0001318008  | -1.1986640086 |
| C | -0.6938334052  | 0.0001333642   | 1.1986637238  |
| C | -1.4188263444  | -0.0000004546  | -0.0000001813 |
| C | -2.8962244117  | 0.0000013151   | 0.0000004958  |
| C | -3.6210807228  | 0.7221877894   | -0.9569514385 |
| C | -3.6210809501  | -0.7221908367  | 0.9569482471  |
| C | -5.0085297140  | 0.7221232772   | -0.9569810582 |
| C | -5.0085298672  | -0.7221190091  | 0.9569839089  |
| C | -5.7334346706  | -0.0000019709  | -0.0000018090 |
| C | -7.2107202303  | 0.0000000522   | 0.0000008471  |
| C | -7.9357682751  | 1.1517528830   | -0.3325383545 |
| C | -7.9357684713  | -1.1517533622  | 0.3325382604  |
| C | -9.3232671531  | 1.1514567301   | -0.3330387050 |
| C | -9.3232672315  | -1.1514574022  | 0.3330381889  |
| C | -10.0479087679 | -0.0000001578  | 0.0000004220  |
| C | -11.5265093853 | -0.0000002467  | 0.0000010391  |
| C | -12.2458052147 | 1.1175855225   | 0.4436303837  |
| C | -12.2458054050 | -1.1175838127  | -0.4436339575 |
| C | -13.6359619931 | 1.1180053475   | 0.4431855791  |
| C | -13.6359620439 | -1.1180076117  | -0.4431798126 |
| C | -14.3375653521 | 0.0000013483   | -0.0000034308 |
| H | -1.2266131740  | -0.01916663206 | -2.1451921312 |
| H | 1.2266136934   | 0.01916667424  | -2.1451916908 |
| H | 1.2266133147   | -0.0191659825  | 2.1451921048  |
| H | -1.2266134163  | 0.0191659304   | 2.1451915982  |
| H | -3.0873941613  | 1.3061074455   | -1.7014987192 |
| H | -5.5416285838  | 1.2777516137   | -1.7233557326 |
| H | -5.5416279308  | -1.2777522767  | 1.7233555982  |
| H | -3.0873940847  | -1.3061063501  | 1.7014984333  |
| H | 3.0873940426   | -1.3061076170  | -1.7014983321 |
| H | 3.0873942836   | 1.3061065189   | 1.7014989879  |
| H | 5.5416282461   | -1.2777517551  | -1.7233553441 |
| H | 5.5416283715   | 1.2777519575   | 1.7233552405  |
| H | 7.4025548176   | -2.0661933233  | -0.5769470793 |
| H | 7.4025548447   | 2.0661930390   | 0.5769472021  |
| H | 9.8572186994   | -2.0552234694  | -0.6129756469 |
| H | 9.8572188559   | 2.0552233058   | 0.6129761059  |
| H | 11.7074731596  | 1.9837100601   | -0.8181681326 |
| H | 11.7074731099  | -1.9837100799  | 0.8181671948  |
| H | 14.1735171182  | 1.9921399743   | -0.7995063193 |
| H | 14.1735169693  | -1.9921397507  | 0.7995069258  |
| H | 15.4235773110  | -0.0000001886  | -0.0000003472 |
| H | -7.4025548292  | 2.0661932212   | -0.5769465301 |
| H | -7.4025548072  | -2.0661930837  | 0.5769478324  |
| H | -9.8572186237  | 2.0552231820   | -0.6129759610 |
| H | -9.8572188823  | -2.0552236469  | 0.6129756949  |
| H | -11.7074731196 | 1.9837101858   | 0.8181679041  |
| H | -11.7074731527 | -1.9837099870  | -0.8181673651 |
| H | -14.1735170639 | 1.9921400253   | 0.7995062584  |

H -14.1735170172 -1.9921397325 -0.7995069090  
H -15.4235773080 -0.0000001284 0.0000003784



Cartesian coordinates (in Å) of [8]-paraphenylene optimized at the PBE0/6-31G(d,p) level of theory:

|   |                |               |               |
|---|----------------|---------------|---------------|
| C | 16.4899939821  | 0.0000091721  | -0.0001079360 |
| C | 15.7888114763  | 0.8957354763  | -0.8030430505 |
| C | 15.7888605895  | -0.8957331562 | 0.8028508067  |
| C | 14.3986469866  | 0.8957420891  | -0.8028143322 |
| C | 14.3986895805  | -0.8956815693 | 0.8027594484  |
| C | 13.6803585244  | -0.0000322891 | -0.0000847791 |
| C | 12.2016920027  | 0.0000133400  | 0.0000161607  |
| C | 11.4780252899  | 1.1973857841  | -0.0593856950 |
| C | 11.4780507096  | -1.1973986832 | 0.0593801671  |
| C | 10.0902583678  | 1.1974828093  | -0.0588186272 |
| C | 10.0902939918  | -1.1975641074 | 0.0586908971  |
| C | 9.3659939993   | -0.0000514301 | 0.0001156643  |
| C | 7.8888857771   | -0.0000254010 | 0.0000048592  |
| C | 7.1643456360   | 0.9878300581  | 0.6793215775  |
| C | 7.1643198997   | -0.9878720671 | -0.6792884604 |
| C | 5.7769301853   | 0.9876582897  | 0.6796494828  |
| C | 5.7769104559   | -0.9877235719 | -0.6795833299 |
| C | 5.0523262043   | -0.0000073057 | -0.0000049679 |
| C | 3.5754920051   | -0.0000668625 | 0.0000807224  |
| C | 2.8504879368   | 0.3847168217  | 1.1354767558  |
| C | 2.8504793735   | -0.3846076230 | -1.1353763799 |
| C | 1.4631680951   | 0.3846994211  | 1.1355384819  |
| C | 1.4631707781   | -0.3847967581 | -1.1353737678 |
| C | 0.7384680869   | 0.0001756739  | 0.0000079646  |
| C | -0.7384676917  | -0.0001493249 | -0.0000035495 |
| C | -1.4631869919  | -0.3846773837 | 1.1355135076  |
| C | -1.4631515990  | 0.3848269753  | -1.1353956375 |
| C | -2.8505039869  | -0.3846298230 | 1.1354660648  |
| C | -2.8504630723  | 0.3847012609  | -1.1353847045 |
| C | -3.5754918975  | 0.0000108922  | 0.0000163089  |
| C | -5.0523261680  | 0.0000447261  | 0.0000499216  |
| C | -5.7769399758  | -0.9876264715 | 0.6797200363  |
| C | -5.7769007256  | 0.9877579489  | -0.6795090860 |
| C | -7.1643606202  | -0.9878640804 | 0.6792882430  |
| C | -7.1643049176  | 0.9878412357  | -0.6793175732 |
| C | -7.8888859699  | 0.0001217360  | 0.0001641959  |
| C | -9.3659940426  | -0.0000182263 | 0.0000568237  |
| C | -10.0902980918 | -1.1975344643 | -0.0587976029 |
| C | -10.0902542851 | 1.1975123475  | 0.0587156449  |
| C | -11.4780607267 | -1.1974141119 | -0.0592894285 |
| C | -11.4780152608 | 1.1973702682  | 0.0594801016  |
| C | -12.2016920842 | -0.0000115146 | -0.0001382711 |
| C | -13.6803586293 | -0.0000707187 | -0.0000565816 |
| C | -14.3986775766 | -0.8957699412 | -0.8028796694 |
| C | -14.3986590833 | 0.8956505833  | 0.8026977413  |
| C | -15.7888525471 | -0.8957487717 | -0.8030803744 |
| C | -15.7888196308 | 0.8957169786  | 0.8028167657  |
| C | -16.4899940405 | -0.0000137835 | -0.0001203742 |
| H | 0.9298604399   | -0.7060480932 | -2.0256912418 |
| H | 3.3836423911   | -0.6708092871 | -2.0376973922 |
| H | 3.3836635447   | 0.6708057584  | 2.0378336248  |
| H | 0.9298346057   | 0.7060773059  | 2.0258026194  |
| H | -0.9298319780  | 0.7060899119  | -2.0257013894 |
| H | -3.3836345058  | 0.6708483451  | -2.0377187006 |
| H | -3.3836709898  | -0.6707793615 | 2.0378081248  |
| H | -0.9298629172  | -0.7060493011 | 2.0257872903  |
| H | 5.2438351110   | -1.7777987409 | -1.2011547958 |
| H | 5.2438786273   | 1.7777386328  | 1.2012322229  |
| H | 7.6980958127   | -1.7577319603 | -1.2295522446 |
| H | 7.6981310246   | 1.7576768797  | 1.2296121933  |
| H | 9.5566979322   | -2.1416828758 | 0.1238032966  |
| H | 9.5566521432   | 2.1415851606  | -0.1237712987 |
| H | 12.0126698679  | -2.1427619991 | 0.0888563567  |
| H | 12.0126319687  | 2.1427498210  | -0.0888681274 |
| H | 13.8576354260  | 1.5790029955  | -1.4513580161 |
| H | 13.8577227732  | -1.5789981943 | 1.4512689133  |
| H | 16.3273073761  | 1.5923720580  | -1.4392187243 |
| H | 16.3273940127  | -1.5923569788 | 1.4390070251  |
| H | 17.5760493619  | 0.0000110134  | -0.0001407216 |
| H | -5.2438201365  | 1.7777901417  | -1.2011420731 |

|   |                |               |               |
|---|----------------|---------------|---------------|
| H | -5.2438940571  | -1.7777520855 | 1.2012380890  |
| H | -7.6980655490  | 1.7577402246  | -1.2295398171 |
| H | -7.6981611688  | -1.7576743488 | 1.2296172255  |
| H | -9.5566456176  | 2.1416189396  | 0.1238129592  |
| H | -9.5567044894  | -2.1416488735 | -0.1237679504 |
| H | -12.0126144971 | 2.1427419015  | 0.0888188493  |
| H | -12.0126873301 | -2.1427696628 | -0.0889127769 |
| H | -13.8576894995 | -1.5790486647 | -1.4514159991 |
| H | -13.8576687234 | 1.5789468264  | 1.4512172684  |
| H | -16.3273722847 | -1.5923817070 | -1.4392448512 |
| H | -16.3273290894 | 1.5923421179  | 1.4389865472  |
| H | -17.5760494106 | 0.0000108414  | -0.0001322395 |

Cartesian coordinates (in Å) of [9]-paraphenylene optimized at the PBE0/6-31G(d,p) level of theory:

|   |               |               |                |
|---|---------------|---------------|----------------|
| C | 0.0000003574  | 0.0000005740  | -18.6524505387 |
| C | 1.0228583739  | -0.6325544241 | -17.9509239842 |
| C | -1.0228589372 | 0.6325535374  | -17.9509241036 |
| C | 1.0229514204  | -0.6319307391 | -16.5606790131 |
| C | -1.0229510728 | 0.6319311432  | -16.5606792566 |
| C | -0.0000001131 | -0.0000002319 | -15.8415830828 |
| C | 0.0000003110  | 0.0000001972  | -14.3631509658 |
| C | 0.4199740510  | -1.1225991863 | -13.6383145843 |
| C | -0.4199753457 | 1.1225988068  | -13.6383144377 |
| C | 0.4204927408  | -1.1225796138 | -12.2507940005 |
| C | -0.4204918677 | 1.1225801087  | -12.2507937657 |
| C | -0.0000002486 | -0.0000000251 | -11.5258443956 |
| C | -0.0000003555 | -0.0000000758 | -10.0486003223 |
| C | -0.3377632953 | -1.1501493878 | -9.3234331417  |
| C | 0.3377637879  | 1.1501489193  | -9.3234330851  |
| C | -0.3371879059 | -1.1503170830 | -7.9360727556  |
| C | 0.3371879455  | 1.1503167918  | -7.9360726118  |
| C | -0.0000005924 | 0.0000000639  | -7.2107594928  |
| C | 0.0000011318  | -0.0000011973 | -5.7335874344  |
| C | -0.9582167089 | -0.7204650112 | -5.0086056159  |
| C | 0.9582151034  | 0.7204674465  | -5.0086054977  |
| C | -0.9581404178 | -0.7205679364 | -3.6211745867  |
| C | 0.9581419817  | 0.7205666323  | -3.6211743950  |
| C | -0.0000000906 | 0.0000005345  | -2.8962463014  |
| C | 0.0000001240  | 0.0000001006  | -1.4188714772  |
| C | -1.1986471472 | 0.0001607684  | -0.6938262607  |
| C | 1.1986473420  | -0.0001605045 | -0.6938264078  |
| C | -1.1986474273 | -0.0001609760 | 0.6938265198   |
| C | 1.1986473435  | 0.0001599583  | 0.6938264329   |
| C | 0.0000000406  | 0.0000009473  | 1.4188712088   |
| C | -0.0000008034 | -0.0000011355 | 2.8962461089   |
| C | -0.9581401952 | 0.7205684653  | 3.6211744310   |
| C | 0.9581419486  | -0.7205662073 | 3.6211742273   |
| C | -0.9582164935 | 0.7204651041  | 5.0086054820   |
| C | 0.9582151025  | -0.7204670000 | 5.0086053409   |
| C | 0.0000005026  | 0.0000006424  | 5.7335874803   |
| C | 0.0000004476  | 0.0000001631  | 7.2107595185   |
| C | -0.3371886857 | 1.1503167410  | 7.9360727957   |
| C | 0.3371873481  | -1.1503170780 | 7.9360725967   |
| C | -0.3377627373 | 1.1501494413  | 9.3234331641   |
| C | 0.3377644048  | -1.1501488546 | 9.3234330836   |
| C | -0.0000009365 | -0.0000002009 | 10.0486003283  |
| C | 0.0000009606  | -0.0000002742 | 11.5258444019  |
| C | 0.4204911430  | 1.1225803552  | 12.2507938054  |
| C | -0.4204934055 | -1.1225793886 | 12.2507939690  |
| C | 0.4199755941  | 1.1225986801  | 13.6383144613  |
| C | -0.4199737401 | -1.1225993378 | 13.6383145688  |
| C | -0.0000008915 | 0.0000003516  | 14.3631509704  |
| C | -0.000001663  | 0.0000001850  | 15.8415830859  |
| C | 1.0229514449  | 0.6319305619  | 16.5606789892  |
| C | -1.0229510225 | -0.6319313617 | 16.5606792841  |
| C | 1.0228580557  | 0.6325548546  | 17.9509239659  |
| C | -1.0228592162 | -0.6325531726 | 17.9509241248  |
| C | 0.0000005373  | -0.0000009302 | 18.6524505392  |
| H | 1.7037341000  | 1.3032500398  | -3.0875873361  |
| H | 1.7257764262  | 1.2745902291  | -5.5415724609  |
| H | -1.7257763005 | -1.2745907516 | -5.5415720003  |
| H | -1.7037337213 | -1.3032494823 | -3.0875872523  |
| H | 2.1452185054  | -0.0193124807 | -1.2265288549  |
| H | 2.1452183053  | 0.0193125240  | 1.2265292241   |
| H | -2.1452186334 | -0.0193120717 | 1.2265289788   |
| H | -2.1452180920 | 0.0193122959  | -1.2265290447  |
| H | 0.5853196948  | 2.0638596917  | -7.4030403425  |
| H | -0.5853204990 | -2.0638595804 | -7.4030403526  |
| H | 0.6222205389  | 2.0529479146  | -9.8565691684  |
| H | -0.6222204032 | -2.0529481875 | -9.8565693386  |
| H | -0.7704097277 | 2.0023421657  | -11.7181056580 |
| H | 0.7704096419  | -2.0023418819 | -11.7181057819 |
| H | -0.7344234001 | 2.0153213469  | -14.1717477306 |
| H | 0.7344232717  | -2.0153213124 | -14.1717478700 |

|   |               |               |                |
|---|---------------|---------------|----------------|
| H | 1.8401618842  | -1.1037896405 | -16.0222129399 |
| H | -1.8401615462 | 1.1037895990  | -16.0222129831 |
| H | 1.8308467105  | -1.1210477191 | -18.4881792244 |
| H | -1.8308466683 | 1.1210478402  | -18.4881793028 |
| H | 0.0000000020  | -0.0000000422 | -19.7384477723 |
| H | 1.7037335538  | -1.3032503257 | 3.0875873325   |
| H | -1.7037339776 | 1.3032495796  | 3.0875875109   |
| H | 1.7257761176  | -1.2745903587 | 5.5415721601   |
| H | -1.7257760560 | 1.2745904820  | 5.5415722487   |
| H | 0.5853201329  | -2.0638597190 | 7.4030403693   |
| H | -0.5853202098 | 2.0638595378  | 7.4030403788   |
| H | 0.6222204334  | -2.0529480478 | 9.8565692123   |
| H | -0.6222207480 | 2.0529479733  | 9.8565693415   |
| H | 0.7704099090  | 2.0023420550  | 11.7181056925  |
| H | -0.7704093458 | -2.0023420385 | 11.7181057587  |
| H | 0.7344233178  | 2.0153213106  | 14.1717478058  |
| H | -0.7344232497 | -2.0153213868 | 14.1717478074  |
| H | 1.8401618134  | 1.1037896502  | 16.0222129479  |
| H | -1.8401615664 | -1.1037896723 | 16.0222129765  |
| H | 1.8308467040  | 1.1210476497  | 18.4881791931  |
| H | -1.8308466236 | -1.1210479964 | 18.4881793322  |
| H | -0.0000000098 | 0.0000000533  | 19.7384477731  |

Cartesian coordinates (in Å) of [10]-paraphenylene optimized at the PBE0/6-31G(d,p) level of theory:

|   |                |               |               |
|---|----------------|---------------|---------------|
| C | 20.8065566135  | 0.0000364246  | -0.0001358910 |
| C | 20.1050132385  | 1.1711265701  | 0.2734808787  |
| C | 20.1050123809  | -1.1711589289 | -0.2732778885 |
| C | 18.7148892769  | 1.1711721093  | 0.2722997280  |
| C | 18.7148947113  | -1.1711335305 | -0.2724794029 |
| C | 17.9956260066  | -0.0000523542 | 0.0001625654  |
| C | 16.5171304240  | 0.0000435422  | -0.0000354287 |
| C | 15.7928406758  | 0.7667101100  | 0.9216947950  |
| C | 15.7928397436  | -0.7667783687 | -0.9216425612 |
| C | 14.4053392993  | 0.7671680178  | 0.9215500515  |
| C | 14.4053348343  | -0.7671557690 | -0.9215949960 |
| C | 13.6811565722  | -0.0000722429 | 0.0000437195  |
| C | 12.2038435244  | -0.0000511075 | -0.0000051391 |
| C | 11.4793572532  | 0.0453686686  | 1.1979336980  |
| C | 11.4793512689  | -0.0453127843 | -1.1979663757 |
| C | 10.0917540129  | 0.0452487480  | 1.1979121437  |
| C | 10.0917294894  | -0.0453046644 | -1.1979387299 |
| C | 9.3669840141   | 0.0000960466  | 0.0000036789  |
| C | 7.8898957674   | -0.0000744158 | -0.0000455381 |
| C | 7.1650949428   | -0.6841801975 | 0.9844074319  |
| C | 7.1650927102   | 0.6842788202  | -0.9843375229 |
| C | 5.7776870015   | -0.6842929115 | 0.9843721781  |
| C | 5.7776907162   | 0.6844005164  | -0.9842935009 |
| C | 5.0528796381   | -0.0000842150 | -0.0000744232 |
| C | 3.5759690573   | 0.0000610173  | 0.0001338801  |
| C | 2.8507740616   | -1.1362614807 | 0.3819460921  |
| C | 2.8507656776   | 1.1361967075  | -0.3821388880 |
| C | 1.4634383101   | -1.1361890301 | 0.3823173367  |
| C | 1.4634419185   | 1.1362091994  | -0.3822683517 |
| C | 0.7385123995   | -0.0000019622 | -0.0000279470 |
| C | -0.7385121915  | -0.0000075889 | 0.0000089758  |
| C | -1.4634437747  | -1.1361878290 | -0.3823237675 |
| C | -1.4634366881  | 1.1362117504  | 0.3822572312  |
| C | -2.8507693303  | -1.1362170016 | -0.3820596408 |
| C | -2.8507706536  | 1.1362430231  | 0.3820199422  |
| C | -3.5759688483  | -0.0000246424 | 0.0000552876  |
| C | -5.0528794007  | 0.0000871334  | -0.0000602563 |
| C | -5.7776910200  | -0.6843692418 | -0.9843043428 |
| C | -5.7776863992  | 0.6843295501  | 0.9843574007  |
| C | -7.1650921881  | -0.6842597042 | -0.9843469839 |
| C | -7.1650951905  | 0.6842053265  | 0.9843933180  |
| C | -7.8898957986  | 0.0000073275  | -0.0000066143 |
| C | -9.3669840370  | -0.0000027003 | 0.0000091217  |
| C | -10.0917374569 | 0.0453144773  | -1.1979251453 |
| C | -10.0917460241 | -0.0452308745 | 1.1979260120  |
| C | -11.4793576914 | 0.0452469598  | -1.1979612193 |
| C | -11.4793507808 | -0.0454266544 | 1.1979392486  |
| C | -12.2038435214 | 0.0000567855  | 0.0000021110  |
| C | -13.6811566623 | -0.0000454926 | -0.0000124014 |
| C | -14.4053426308 | 0.7672366870  | -0.9214946822 |
| C | -14.4053314740 | -0.7670808677 | 0.9216555567  |
| C | -15.7928468438 | 0.7666918003  | -0.9217115077 |
| C | -15.7928335763 | -0.7667903141 | 0.9216310154  |
| C | -16.5171304075 | -0.0000919934 | -0.0000869540 |
| C | -17.9956261040 | -0.0000211090 | -0.0000136611 |
| C | -18.7148767590 | 1.1711694097  | -0.2723388520 |
| C | -18.7149075419 | -1.1711345349 | 0.2724481536  |
| C | -20.1050035989 | 1.1711649523  | -0.2733729783 |
| C | -20.1050220087 | -1.1711187770 | 0.2733936296  |
| C | -20.8065565256 | 0.0000074757  | -0.0000595167 |
| H | 5.2447922754   | 1.2096223150  | -1.7720534621 |
| H | 7.6985687562   | 1.2384899210  | -1.7515507212 |
| H | 7.6986010496   | -1.2384905035 | 1.7515321106  |
| H | 5.2448105289   | -1.2096562533 | 1.7720494695  |
| H | 3.3837608411   | 2.0393608367  | -0.6659709399 |
| H | 0.9303632192   | 2.0272573173  | -0.7018649163 |
| H | 0.9303484060   | -2.0272477636 | 0.7018727368  |
| H | 3.3837555966   | -2.0393584180 | 0.6660076681  |
| H | 9.5586410517   | -0.0999270219 | -2.1429754189 |
| H | 9.5586865958   | 0.0999474046  | 2.1429520177  |

|   |                |               |               |
|---|----------------|---------------|---------------|
| H | 12.0127349292  | -0.0626572050 | -2.1442663575 |
| H | 12.0127424930  | 0.0626649674  | 2.1442222360  |
| H | 13.8707210887  | -1.3853082209 | -1.6372783863 |
| H | 13.8707350704  | 1.3852933813  | 1.6372623705  |
| H | 16.3272379965  | -1.3567160381 | -1.6609907188 |
| H | 16.3272471890  | 1.3567099847  | 1.6609771224  |
| H | 18.1756892804  | 2.0958310114  | 0.4583821375  |
| H | 18.1756948161  | -2.0958205397 | -0.4584010337 |
| H | 20.6428373245  | 2.0923205767  | 0.4792215584  |
| H | 20.6428177538  | -2.0923006899 | -0.4792628888 |
| H | 21.8926274617  | -0.0000068256 | 0.0000247978  |
| H | -0.9303471855  | 2.0272512292  | 0.7018713290  |
| H | -0.9303649029  | -2.0272569887 | -0.7018568540 |
| H | -3.3837492082  | 2.0393752502  | 0.6659855408  |
| H | -3.3837678111  | -2.0393469726 | -0.6659834381 |
| H | -5.2448056677  | 1.2096655402  | 1.7720529533  |
| H | -5.2447974889  | -1.2096235971 | -1.7720428150 |
| H | -7.6985916834  | 1.2385163767  | 1.7515264038  |
| H | -7.6985781333  | -1.2384738607 | -1.7515487953 |
| H | -9.5586613784  | 0.0999384341  | -2.1429675639 |
| H | -9.5586663754  | -0.0999219683 | 2.1429606182  |
| H | -12.0127459714 | 0.0626979136  | -2.1442455131 |
| H | -12.0127313660 | -0.0626103675 | 2.1442435459  |
| H | -13.8707517846 | 1.3852900769  | -1.6372779703 |
| H | -13.8707044070 | -1.3853004247 | 1.6372722011  |
| H | -16.3272548173 | 1.3567180685  | -1.6609705784 |
| H | -16.3272302659 | -1.3566964939 | 1.6610065339  |
| H | -18.1756706019 | 2.0958305824  | -0.4584302139 |
| H | -18.1757138667 | -2.0958177770 | 0.4583676333  |
| H | -20.6428324283 | 2.0923230834  | -0.4792638114 |
| H | -20.6428225765 | -2.0922948169 | 0.4792352852  |
| H | -21.8926273318 | 0.0000158183  | 0.0000085580  |

Cartesian coordinates (in Å) of [11]-paraphenylene optimized at the PBE0/6-31G(d,p) level of theory:

|   |                |               |               |
|---|----------------|---------------|---------------|
| C | -22.9664709398 | 0.0000237811  | -0.0000472627 |
| C | -22.2649230335 | 1.2005969090  | 0.0683350113  |
| C | -22.2649348195 | -1.2005670385 | -0.0682443784 |
| C | -20.8746046789 | 1.2003025637  | 0.0692756071  |
| C | -20.8746231897 | -1.2002787578 | -0.0694489018 |
| C | -20.1553216607 | -0.0000134059 | 0.0001132962  |
| C | -18.6768544935 | -0.0000445698 | -0.0000597663 |
| C | -17.9522487318 | 0.9934226319  | -0.6705545243 |
| C | -17.9522480763 | -0.9934463857 | 0.6706153236  |
| C | -16.5647455966 | 0.9938244283  | -0.6703254163 |
| C | -16.5647213554 | -0.9939069987 | 0.6702982295  |
| C | -15.8399399016 | 0.0000053966  | 0.0000321266  |
| C | -14.3629861344 | 0.0000001775  | -0.0000011630 |
| C | -13.6376151687 | 0.4014160852  | -1.1293934435 |
| C | -13.6375937023 | -0.4013030129 | 1.1294368466  |
| C | -12.2503073702 | 0.4021162023  | -1.1292339335 |
| C | -12.2502776938 | -0.4021787515 | 1.1291913323  |
| C | -11.5251416174 | 0.0000059064  | -0.0000163143 |
| C | -10.0481346034 | 0.0000095916  | -0.0000190369 |
| C | -9.3229152067  | -0.3533697342 | -1.1454115634 |
| C | -9.3229348547  | 0.3533693579  | 1.1454104148  |
| C | -7.9356312319  | -0.3525136775 | -1.1456195987 |
| C | -7.9356393998  | 0.3525177854  | 1.1456437747  |
| C | -7.2102136198  | -0.0000608685 | 0.0000318656  |
| C | -5.7332496320  | 0.0000445354  | -0.0000128076 |
| C | -5.0082184676  | -0.9595875971 | -0.7185528231 |
| C | -5.0081948371  | 0.9596450801  | 0.7185438335  |
| C | -3.6208524466  | -0.9594183645 | -0.7187921919 |
| C | -3.6208215657  | 0.9594319731  | 0.7187878611  |
| C | -2.8959459327  | -0.0000152376 | 0.0000054702  |
| C | -1.4187538719  | -0.0000103836 | -0.0000208815 |
| C | -0.6937925471  | -1.1986811091 | 0.0002074643  |
| C | -0.6938001274  | 1.1986597209  | -0.0002010149 |
| C | 0.6938001332   | -1.1986715071 | -0.0001843360 |
| C | 0.6937924411   | 1.1986692906  | 0.0002239160  |
| C | 1.4187536846   | -0.0000017770 | 0.0000019475  |
| C | 2.8959457642   | 0.0000263936  | 0.0000149324  |
| C | 3.6208292765   | -0.9594309385 | 0.7187665334  |
| C | 3.6208449737   | 0.9594189963  | -0.7188136767 |
| C | 5.0081966042   | -0.9596270850 | 0.7185373226  |
| C | 5.0082169349   | 0.9596054696  | -0.7185597004 |
| C | 5.7332494586   | -0.0000249483 | -0.0000130233 |
| C | 7.2102134815   | 0.0000302550  | 0.0000148038  |
| C | 7.9356329139   | -0.3525287893 | 1.1456384032  |
| C | 7.9356374847   | 0.3525027892  | -1.1456248049 |
| C | 9.3229281625   | -0.3533696639 | 1.1454173959  |
| C | 9.3229216627   | 0.3533701882  | -1.1454040525 |
| C | 10.0481346530  | -0.0000014676 | -0.0000047976 |
| C | 11.5251416493  | -0.0000164982 | -0.0000015075 |
| C | 12.2502834993  | 0.4021860829  | 1.1291954267  |
| C | 12.2503016014  | -0.4021076942 | -1.1292302770 |
| C | 13.6375974732  | 0.4013278266  | 1.1294263347  |
| C | 13.6376114367  | -0.4013900949 | -1.1294043809 |
| C | 14.3629861663  | 0.0000057048  | -0.0000030401 |
| C | 15.8399399124  | 0.0000002368  | 0.0000136682  |
| C | 16.5647237125  | 0.9938870501  | 0.6703069625  |
| C | 16.5647432380  | -0.9938437432 | -0.6703175915 |
| C | 17.9522480569  | 0.9934258628  | 0.6706269609  |
| C | 17.9522487594  | -0.9934425626 | -0.6705437552 |
| C | 18.6768545214  | 0.0000439405  | -0.0000714872 |
| C | 20.1553217142  | 0.0000054621  | 0.0000086033  |
| C | 20.8746204225  | 1.2002885444  | -0.0693321648 |
| C | 20.8746072980  | -1.2002927538 | 0.0693913088  |
| C | 22.2649331067  | 1.2005631893  | -0.0683868706 |
| C | 22.2649246284  | -1.2006012194 | 0.0681914854  |
| C | 22.9664711623  | -0.0000085990 | 0.0001164599  |
| H | -7.4028190451  | 0.6128906384  | 2.0559289937  |
| H | -9.8558561318  | 0.6504557403  | 2.0442953789  |
| H | -9.8558358113  | -0.6504790438 | -2.0442821844 |
| H | -7.4028070276  | -0.6128543158 | -2.0559045098 |

|   |                |               |               |
|---|----------------|---------------|---------------|
| H | -5.5410815780  | 1.7287918895  | 1.2705865005  |
| H | -3.0872345093  | 1.7064593624  | 1.2997066053  |
| H | -3.0872855252  | -1.7064679223 | -1.2996991891 |
| H | -5.5411146261  | -1.7287658727 | -1.2705363798 |
| H | -11.7176771010 | -0.7377095126 | 2.0146265543  |
| H | -11.7177019321 | 0.7377373103  | -2.0146366418 |
| H | -14.1703071260 | -0.7005129321 | 2.0277761138  |
| H | -14.1703415593 | 0.7005344451  | -2.0277596520 |
| H | -16.0321006389 | -1.7892583555 | 1.1842654912  |
| H | -16.0321216586 | 1.7892253180  | -1.1841869317 |
| H | -18.4860266252 | -1.7680962929 | 1.2141547084  |
| H | -18.4860194474 | 1.7680539158  | -1.2141158666 |
| H | -20.3360327743 | 2.1401416107  | 0.1527133720  |
| H | -20.3360615939 | -2.1401315309 | -0.1526677805 |
| H | -22.8022827360 | 2.1426108216  | 0.1312649457  |
| H | -22.8022891044 | -2.1425732524 | -0.1312727998 |
| H | -24.0525525484 | 0.0000216233  | -0.0000110229 |
| H | -1.2265348595  | 2.1452557386  | -0.0193868932 |
| H | -1.2265207332  | -2.1452800746 | 0.0193879947  |
| H | 1.2265157858   | 2.1452709820  | 0.0193865053  |
| H | 1.2265403183   | -2.1452645034 | -0.0193884196 |
| H | 3.0872755508   | 1.7064883029  | -1.2996969449 |
| H | 3.0872451415   | -1.7064388386 | 1.2997089539  |
| H | 5.5411170068   | 1.7287771496  | -1.2705534946 |
| H | 5.5410799375   | -1.7287803550 | 1.2705695215  |
| H | 7.4028092076   | -0.6128878607 | 2.0559252008  |
| H | 7.4028171197   | 0.6128578731  | -2.0559081351 |
| H | 9.8558494363   | -0.6504616534 | 2.0443009107  |
| H | 9.8558423870   | 0.6504738185  | -2.0442760477 |
| H | 11.7176863696  | 0.7377142274  | 2.0146327653  |
| H | 11.7176927499  | -0.7377307218 | -2.0146311831 |
| H | 14.1703179111  | 0.7005078299  | 2.0277710474  |
| H | 14.1703308070  | -0.7005374653 | -2.0277654658 |
| H | 16.0320984607  | 1.7892532689  | 1.1842430314  |
| H | 16.0321238093  | -1.7892293550 | -1.1842109327 |
| H | 18.4860180882  | 1.7681020272  | 1.2141346025  |
| H | 18.4860279757  | -1.7680471549 | -1.2141374446 |
| H | 20.3360348463  | -2.1401392054 | 0.1526974107  |
| H | 20.3360595002  | 2.1401340087  | -0.1526820411 |
| H | 22.8022842289  | -2.1426048797 | 0.1312829767  |
| H | 22.8022877827  | 2.1425797005  | -0.1312530632 |
| H | 24.0525529303  | -0.0000171359 | -0.0000445279 |



Cartesian coordinates (in Å) of [12]-paraphenylene optimized at the PBE0/6-31G(d,p) level of theory:

|   |                |               |               |
|---|----------------|---------------|---------------|
| C | 25.1253590780  | -0.0000004886 | -0.0000012092 |
| C | 24.4237536728  | -1.1075011313 | 0.4688029766  |
| C | 24.4237537035  | 1.1075020392  | -0.4688008855 |
| C | 23.0336048754  | -1.1070172113 | 0.4693039458  |
| C | 23.0336049945  | 1.1070163834  | -0.4693056525 |
| C | 22.3142372798  | 0.0000002084  | 0.0000006712  |
| C | 20.8356683417  | 0.0000001123  | -0.0000004351 |
| C | 20.1109601873  | -1.1595039009 | -0.3037136014 |
| C | 20.1109600963  | 1.1595037016  | 0.3037143617  |
| C | 18.7234677280  | -1.1598452767 | -0.3030003459 |
| C | 18.7234675501  | 1.1598454638  | 0.3029996558  |
| C | 17.9984143007  | -0.0000000848 | 0.0000002794  |
| C | 16.5210626005  | -0.0000002571 | 0.0000001499  |
| C | 15.7960713423  | -0.7495440730 | -0.9356772023 |
| C | 15.7960712398  | 0.7495446185  | 0.9356766744  |
| C | 14.4086731392  | -0.7499409222 | -0.9354013366 |
| C | 14.4086729803  | 0.7499399300  | 0.9354020646  |
| C | 13.6838212863  | 0.0000005780  | -0.0000004772 |
| C | 12.2063533476  | -0.0000011905 | 0.0000001226  |
| C | 11.4813471792  | -0.0357616572 | -1.1981033381 |
| C | 11.4813471141  | 0.0357640175  | 1.1981033170  |
| C | 10.0937186122  | -0.0361514741 | -1.1980793595 |
| C | 10.0937184985  | 0.0361492109  | 1.1980796598  |
| C | 9.3685775429   | 0.0000008694  | 0.0000001185  |
| C | 7.8912693599   | -0.0000007620 | -0.0000003253 |
| C | 7.1662020551   | 0.6879092315  | -0.9817303516 |
| C | 7.1662022032   | -0.6879076738 | 0.9817317966  |
| C | 5.7787637265   | 0.6876478697  | -0.9819220482 |
| C | 5.7787638163   | -0.6876496725 | 0.9819208877  |
| C | 5.0537392669   | 0.0000008987  | 0.0000007509  |
| C | 3.5766479704   | -0.0000000327 | -0.0000003593 |
| C | 2.8512270791   | 1.1379722406  | -0.3765809295 |
| C | 2.8512272076   | -1.1379720402 | 0.3765809301  |
| C | 1.4638872379   | 1.1377727712  | -0.3771888319 |
| C | 1.4638872981   | -1.1377724291 | 0.3771892175  |
| C | 0.7385956290   | 0.0000000470  | -0.0000002205 |
| C | -0.7385954292  | -0.0000000140 | -0.0000000684 |
| C | -1.4638872370  | 1.1377725353  | 0.3771892280  |
| C | -1.4638870525  | -1.1377727378 | -0.3771889167 |
| C | -2.8512270792  | 1.1379721959  | 0.3765806170  |
| C | -2.8512269634  | -1.1379720173 | -0.3765813208 |
| C | -3.5766477359  | -0.0000001311 | 0.0000002652  |
| C | -5.0537390331  | 0.0000001579  | -0.0000001018 |
| C | -5.7787636906  | 0.6876485432  | 0.9819215461  |
| C | -5.7787638077  | -0.6876489656 | -0.9819212284 |
| C | -7.1662020962  | 0.6879085232  | 0.9817309653  |
| C | -7.1662021323  | -0.6879080661 | -0.9817313772 |
| C | -7.8912691713  | -0.0000002134 | 0.0000000760  |
| C | -9.3685774044  | 0.0000001587  | 0.0000000099  |
| C | -10.0937183796 | -0.0361503634 | 1.1980794686  |
| C | -10.0937185200 | 0.0361502777  | -1.1980794475 |
| C | -11.4813470237 | -0.0357629327 | 1.1981031920  |
| C | -11.4813470977 | 0.0357628098  | -1.1981032235 |
| C | -12.2063533769 | 0.0000002721  | -0.0000000080 |
| C | -13.6838213046 | -0.0000001204 | -0.0000000790 |
| C | -14.4086729844 | -0.7499402671 | 0.9354018485  |
| C | -14.4086731568 | 0.7499404769  | -0.9354016289 |
| C | -15.7960712542 | -0.7495444409 | 0.9356768304  |
| C | -15.7960713440 | 0.7495442151  | -0.9356770806 |
| C | -16.5210626089 | 0.0000000166  | -0.0000000179 |
| C | -17.9984143100 | -0.0000000111 | -0.0000001378 |
| C | -18.7234677183 | -1.1598452956 | 0.3030001589  |
| C | -18.7234675732 | 1.1598454382  | -0.3029998743 |
| C | -20.1109601837 | -1.1595038377 | 0.3037137617  |
| C | -20.1109601111 | 1.1595037553  | -0.3037142348 |
| C | -20.8356683485 | 0.0000001064  | 0.0000003587  |
| C | -22.3142372869 | 0.0000002092  | -0.0000006769 |
| C | -23.0336048804 | -1.1070172257 | -0.4693039127 |
| C | -23.0336050013 | 1.1070163824  | 0.4693056545  |
| C | -24.4237536764 | -1.1075011319 | -0.4688029746 |

|   |                |               |               |
|---|----------------|---------------|---------------|
| C | -24.4237537112 | 1.1075020524  | 0.4688008559  |
| C | -25.1253590829 | -0.0000004916 | 0.0000012110  |
| H | 9.5610547707   | 0.0839299411  | 2.1436545463  |
| H | 12.0141127423  | 0.0451506759  | 2.1447816342  |
| H | 12.0141125271  | -0.0451510038 | -2.1447817871 |
| H | 9.5610547319   | -0.0839296104 | -2.1436542590 |
| H | 7.6993784646   | -1.2453979728 | 1.7467094948  |
| H | 5.2460581164   | -1.2154705360 | 1.7680277347  |
| H | 5.2460584061   | 1.2154708410  | -1.7680277477 |
| H | 7.6993784873   | 1.2453973880  | -1.7467094267 |
| H | 13.8748939799  | 1.3552053406  | 1.6625493890  |
| H | 13.8748940508  | -1.3552048268 | -1.6625497332 |
| H | 16.3293458867  | 1.3259865029  | 1.6863238250  |
| H | 16.3293459814  | -1.3259865523 | -1.6863238698 |
| H | 18.1901992275  | 2.0802123792  | 0.5238574638  |
| H | 18.1901992799  | -2.0802122212 | -0.5238574954 |
| H | 20.6449396430  | 2.0700494818  | 0.5607453409  |
| H | 20.6449397448  | -2.0700494054 | -0.5607454988 |
| H | 22.4954498856  | -1.9643365955 | 0.8638425424  |
| H | 22.4954498832  | 1.9643365719  | -0.8638421271 |
| H | 24.9612473055  | -1.9733341255 | 0.8449088982  |
| H | 24.9612472893  | 1.9733340616  | -0.8449090890 |
| H | 26.2113685648  | 0.0000000457  | 0.0000001020  |
| H | 3.3839922737   | -2.0426265784 | 0.6559069548  |
| H | 3.3839922410   | 2.0426264782  | -0.6559074915 |
| H | 0.9312117964   | -2.0303407838 | 0.6929877279  |
| H | 0.9312116707   | 2.0303409463  | -0.6929876971 |
| H | -0.9312118490  | -2.0303410496 | -0.6929879962 |
| H | -0.9312119424  | 2.0303408376  | 0.6929879795  |
| H | -3.3839924290  | -2.0426264575 | -0.6559069581 |
| H | -3.3839925377  | 2.0426264315  | 0.6559069061  |
| H | -5.2460584737  | 1.2154707743  | 1.7680277692  |
| H | -5.2460584593  | -1.2154707701 | -1.7680275483 |
| H | -7.6993786314  | 1.2453974999  | 1.7467094479  |
| H | -7.6993786919  | -1.2453975476 | -1.7467094577 |
| H | -9.5610548285  | -0.0839300511 | 2.1436544601  |
| H | -9.5610548622  | 0.0839300105  | -2.1436543220 |
| H | -12.0141125810 | -0.0451507226 | 2.1447815257  |
| H | -12.0141126164 | 0.0451507205  | -2.1447815756 |
| H | -13.8748939934 | -1.3552051069 | 1.6625496523  |
| H | -13.8748940557 | 1.3552049961  | -1.6625495184 |
| H | -16.3293458910 | -1.3259865113 | 1.6863238387  |
| H | -16.3293460084 | 1.3259864512  | -1.6863239242 |
| H | -18.1901992413 | 2.0802124110  | -0.5238574474 |
| H | -18.1901992786 | -2.0802121841 | 0.5238575543  |
| H | -20.6449396702 | 2.0700494827  | -0.5607453779 |
| H | -20.6449397282 | -2.0700493951 | 0.5607454983  |
| H | -22.4954498836 | -1.9643366051 | -0.8638425142 |
| H | -22.4954498970 | 1.9643365834  | 0.8638421139  |
| H | -24.9612473080 | -1.9733341313 | -0.8449088798 |
| H | -24.9612472968 | 1.9733340723  | 0.8449090666  |
| H | -26.2113685688 | 0.0000000489  | -0.0000001025 |

Cartesian coordinates (in Å) of [13]-paraphenylene optimized at the PBE0/6-31G(d,p) level of theory:

|   |                |               |               |
|---|----------------|---------------|---------------|
| C | 27.2803786915  | -0.0000047087 | -0.0000049716 |
| C | 26.5791115889  | 0.8914257859  | -0.8075987416 |
| C | 26.5791092379  | -0.8914131603 | 0.8076114646  |
| C | 25.1889788641  | 0.8909802147  | -0.8078524981 |
| C | 25.1889785758  | -0.8909950400 | 0.8078309166  |
| C | 24.4702883645  | 0.0000156701  | 0.0000153459  |
| C | 22.9915770784  | -0.0000083484 | 0.0000016505  |
| C | 22.2674789127  | 1.1958901051  | -0.0816949880 |
| C | 22.2674736315  | -1.1958991514 | 0.0816800856  |
| C | 20.8797611363  | 1.1959891392  | -0.0818277935 |
| C | 20.8797556875  | -1.1959920737 | 0.0818791501  |
| C | 20.1550425175  | -0.0000016091 | -0.0000457880 |
| C | 18.6778906654  | -0.0000184471 | 0.0000297458  |
| C | 17.9528808564  | 1.0060680163  | 0.6516422683  |
| C | 17.9528855584  | -1.0060529906 | -0.6516797714 |
| C | 16.5654320653  | 1.0061403628  | 0.6516408571  |
| C | 16.5654359331  | -1.0061463719 | -0.6516441036 |
| C | 15.8404747825  | -0.0000150296 | 0.0000070644  |
| C | 14.3635039976  | 0.0000852660  | -0.0000296452 |
| C | 13.6381359752  | 0.4154071954  | 1.1243478992  |
| C | 13.6381315803  | -0.4155203687 | -1.1242928152 |
| C | 12.2507620507  | 0.4159996483  | 1.1241751460  |
| C | 12.2507638093  | -0.4158821979 | -1.1242041005 |
| C | 11.5255507216  | -0.0000703206 | 0.0000312866  |
| C | 10.0484064247  | -0.0000178686 | -0.0000149832 |
| C | 9.3232017067   | -0.3416331346 | 1.1489863944  |
| C | 9.3231996956   | 0.3416844028  | -1.1489838355 |
| C | 7.9358463277   | -0.3412126577 | 1.1490799820  |
| C | 7.9358413348   | 0.3411367018  | -1.1491150517 |
| C | 7.2105314779   | 0.0000602175  | 0.0000162925  |
| C | 5.7334468271   | -0.0000166155 | -0.0000149188 |
| C | 5.0084890164   | -0.9576642993 | 0.7211936521  |
| C | 5.0084928142   | 0.9576753116  | -0.7211805114 |
| C | 3.6210570004   | -0.9576831202 | 0.7211377186  |
| C | 3.6210608142   | 0.9576968788  | -0.7211198698 |
| C | 2.8961730405   | -0.0000113875 | -0.0000220636 |
| C | 1.4188490905   | 0.0000010687  | 0.0000548052  |
| C | 0.6938239169   | -1.1986386507 | -0.0001598570 |
| C | 0.6938218585   | 1.1986339311  | 0.0000848247  |
| C | -0.6938238262  | -1.1986383987 | 0.0001561802  |
| C | -0.6938218936  | 1.1986341670  | -0.0000884058 |
| C | -1.4188489556  | 0.0000006451  | -0.0000495503 |
| C | -2.8961729070  | -0.0000093941 | 0.0000204820  |
| C | -3.6210583446  | -0.9576813274 | -0.7211369704 |
| C | -3.6210596512  | 0.9576984275  | 0.7211206486  |
| C | -5.0084909657  | -0.9576751583 | -0.7211770695 |
| C | -5.0084910585  | 0.9576645093  | 0.7211971884  |
| C | -5.7334466811  | 0.0000158579  | -0.0000143218 |
| C | -7.2105313566  | -0.0000408928 | 0.0000121971  |
| C | -7.9358424495  | -0.3411486839 | -1.1491079456 |
| C | -7.9358450207  | 0.3412006977  | 1.1490869578  |
| C | -9.3232005248  | -0.3416839163 | -1.1489806455 |
| C | -9.3232006810  | 0.3416342206  | 1.1489891552  |
| C | -10.0484064619 | 0.0000297135  | -0.0000116794 |
| C | -11.5255507606 | 0.0000100702  | 0.0000076994  |
| C | -12.2507628467 | 0.4159273879  | -1.1241917266 |
| C | -12.2507630580 | -0.4159537874 | 1.1241877250  |
| C | -13.6381328789 | 0.4154795748  | -1.1243116966 |
| C | -13.6381346665 | -0.4154473888 | 1.1243291737  |
| C | -14.3635039932 | -0.0000241163 | -0.0000075137 |
| C | -15.8404747819 | 0.0000009814  | -0.0000036078 |
| C | -16.5654346673 | 1.0061473037  | -0.6516387258 |
| C | -16.5654333559 | -1.0061391545 | 0.6516466603  |
| C | -17.9528843685 | 1.0060526366  | -0.6516764365 |
| C | -17.9528820701 | -1.0060680880 | 0.6516460358  |
| C | -18.6778906783 | 0.0000147798  | 0.0000259322  |
| C | -20.1550425287 | 0.0000020960  | -0.0000428928 |
| C | -20.8797557462 | 1.1959923840  | 0.0818779685  |
| C | -20.8797610992 | -1.1959888601 | -0.0818284674 |
| C | -22.2674736565 | 1.1958994358  | 0.0816803004  |

|   |                |               |               |
|---|----------------|---------------|---------------|
| C | -22.2674789080 | -1.1958898537 | -0.0816942661 |
| C | -22.9915770915 | 0.0000085523  | 0.0000024691  |
| C | -24.4702883778 | -0.0000152772 | 0.0000154316  |
| C | -25.1889785542 | 0.8909953422  | 0.8078312053  |
| C | -25.1889789079 | -0.8909802535 | -0.8078518424 |
| C | -26.5791092216 | 0.8914136263  | 0.8076116019  |
| C | -26.5791116247 | -0.8914256588 | -0.8075982343 |
| C | -27.2803786986 | 0.0000049546  | -0.0000045686 |
| H | 7.4026768099   | -0.5925840713 | 2.0617194404  |
| H | 9.8562474273   | -0.6292241453 | 2.0509011982  |
| H | 9.8562507911   | 0.6292132591  | -2.0509146920 |
| H | 7.4026736717   | 0.5926015815  | -2.0617267734 |
| H | 5.5417143525   | -1.7252727800 | 1.2750972243  |
| H | 3.0873883305   | -1.7036069959 | 1.3034216314  |
| H | 3.0873882335   | 1.7036064945  | -1.3034211858 |
| H | 5.5417133126   | 1.7252755682  | -1.2750976519 |
| H | 11.7182163357  | 0.7622197007  | 2.0055222519  |
| H | 11.7182198134  | -0.7622354741 | -2.0055024055 |
| H | 14.1708474053  | 0.7259007797  | 2.0188969298  |
| H | 14.1708432464  | -0.7258762316 | -2.0188923936 |
| H | 16.0328346652  | 1.8107756869  | 1.1509873655  |
| H | 16.0328311845  | -1.8107735541 | -1.1509974926 |
| H | 18.4860129869  | 1.7907715929  | 1.1812473019  |
| H | 18.4860135118  | -1.7907803873 | -1.1812494301 |
| H | 20.3465135748  | -2.1388482446 | 0.1655084052  |
| H | 20.3465138463  | 2.1388395113  | -0.1655166431 |
| H | 22.8016400604  | -2.1407814991 | 0.1284484711  |
| H | 22.8016394693  | 2.1407762785  | -0.1284441950 |
| H | 1.2265628357   | -2.1452558775 | -0.0191414011 |
| H | 1.2265627295   | 2.1452498140  | 0.0191526378  |
| H | -1.2265640975  | -2.1452550065 | 0.0191426992  |
| H | -1.2265618920  | 2.1452504087  | -0.0191517848 |
| H | -3.0873890551  | -1.7036054959 | -1.3034213327 |
| H | -3.0873880365  | 1.7036082585  | 1.3034211517  |
| H | -5.5417128217  | -1.7252735487 | -1.2750968419 |
| H | -5.5417154551  | 1.7252747476  | 1.2750978566  |
| H | -7.4026765102  | 0.5925882979  | 2.0617216919  |
| H | -7.4026741740  | -0.5925979398 | -2.0617243841 |
| H | -9.8562487053  | 0.6292228509  | 2.0509035365  |
| H | -9.8562494292  | -0.6292150482 | -2.0509118683 |
| H | -11.7182171981 | -0.7622250244 | 2.0055156552  |
| H | -11.7182190412 | 0.7622291479  | -2.0055093448 |
| H | -14.1708461096 | -0.7258924561 | 2.0188958645  |
| H | -14.1708445333 | 0.7258835417  | -2.0188937659 |
| H | -16.0328340242 | -1.8107748783 | 1.1509908106  |
| H | -16.0328318372 | 1.8107738798  | -1.1509947829 |
| H | -18.4860139980 | -1.7907728117 | 1.1812486288  |
| H | -18.4860125207 | 1.7907786794  | -1.1812488486 |
| H | -20.3465131921 | 2.1388482586  | 0.1655081598  |
| H | -20.3465142553 | -2.1388395647 | -0.1655159988 |
| H | -22.8016399378 | 2.1407818082  | 0.1284484156  |
| H | -22.8016396177 | -2.1407760171 | -0.1284433647 |
| H | -24.6486290675 | -1.5706339139 | -1.4606318716 |
| H | -24.6486233318 | 1.5706264843  | 1.4606317664  |
| H | -27.1176133612 | -1.5850682121 | -1.4470858705 |
| H | -27.1176071966 | 1.5850761570  | 1.4470807715  |
| H | -28.3664122636 | 0.0000065686  | -0.0000029131 |
| H | 24.6486290567  | 1.5706338839  | -1.4606325381 |
| H | 24.6486233267  | -1.5706259155 | 1.4606317409  |
| H | 27.1176133235  | 1.5850681576  | -1.4470865887 |
| H | 27.1176072209  | -1.5850756170 | 1.4470806991  |
| H | 28.3664122559  | -0.0000063376 | -0.0000033622 |

Cartesian coordinates (in Å) of [14]-paraphenylene optimized at the PBE0/6-31G(d,p) level of theory:

|   |                |               |               |
|---|----------------|---------------|---------------|
| C | 29.4406727245  | 0.0000000292  | 0.0000000116  |
| C | 28.7390691812  | -0.6061216098 | 1.0386128561  |
| C | 28.7390692420  | 0.6061218317  | -1.0386127328 |
| C | 27.3487779715  | -0.6059634599 | 1.0384944561  |
| C | 27.3487781053  | 0.6059631699  | -1.0384945658 |
| C | 26.6295370610  | 0.0000000046  | 0.0000000273  |
| C | 25.1508654841  | 0.0000000109  | -0.0000000072 |
| C | 24.4258748270  | -1.1140791069 | 0.4420633828  |
| C | 24.4258747439  | 1.1140788969  | -0.4420639616 |
| C | 23.0383453099  | -1.1139372936 | 0.4426929526  |
| C | 23.0383451707  | 1.1139374460  | -0.4426926298 |
| C | 22.3134609449  | 0.0000000004  | -0.0000000028 |
| C | 20.8364927524  | -0.0000000070 | 0.0000000255  |
| C | 20.1113911328  | -1.1575479228 | -0.3111100061 |
| C | 20.1113911731  | 1.1575479459  | 0.3111098633  |
| C | 18.7240120085  | -1.1578693492 | -0.3102198348 |
| C | 18.7240121046  | 1.1578692364  | 0.3102199645  |
| C | 17.9985968985  | -0.0000000463 | 0.0000000362  |
| C | 16.5212017724  | -0.0000002776 | 0.0000002673  |
| C | 15.7960322610  | -0.7447548279 | -0.9394582333 |
| C | 15.7960321594  | 0.7447556492  | 0.9394576432  |
| C | 14.4085616033  | -0.7449283789 | -0.9392801083 |
| C | 14.4085614468  | 0.7449280626  | 0.9392804611  |
| C | 13.6836538155  | 0.0000000447  | -0.0000000057 |
| C | 12.2062338495  | 0.0000005233  | -0.0000001125 |
| C | 11.4812096782  | -0.0288480679 | -1.1982899270 |
| C | 11.4812096503  | 0.0288471338  | 1.1982897952  |
| C | 10.0935769639  | -0.0290545141 | -1.1982539679 |
| C | 10.0935768864  | 0.0290550699  | 1.1982538947  |
| C | 9.3684398293   | -0.0000002158 | -0.0000000349 |
| C | 7.8912121026   | 0.0000006418  | 0.0000004429  |
| C | 7.1661392203   | 0.6930209830  | -0.9781040064 |
| C | 7.1661392108   | -0.6930221816 | 0.9781030929  |
| C | 5.7787305385   | 0.6926739819  | -0.9783944683 |
| C | 5.7787304512   | -0.6926735474 | 0.9783949352  |
| C | 5.0536873184   | -0.0000000702 | 0.0000000472  |
| C | 3.5767141735   | -0.0000002051 | -0.0000002119 |
| C | 2.8512306454   | 1.1387095555  | -0.3741688202 |
| C | 2.8512307904   | -1.1387095303 | 0.3741696843  |
| C | 1.4639388788   | 1.1384575286  | -0.3750277637 |
| C | 1.4639389961   | -1.1384584435 | 0.3750255160  |
| C | 0.7385476339   | 0.0000003298  | 0.0000015149  |
| C | -0.7385474617  | 0.0000001044  | 0.0000000434  |
| C | -1.4639390366  | 1.1384581862  | 0.3750261743  |
| C | -1.4639388793  | -1.1384575314 | -0.3750274495 |
| C | -2.8512307775  | 1.1387093194  | 0.3741704118  |
| C | -2.8512307046  | -1.1387098193 | -0.3741682116 |
| C | -3.5767139880  | 0.0000004168  | -0.0000008760 |
| C | -5.0536871738  | -0.0000001044 | 0.0000000520  |
| C | -5.7787304475  | 0.6926735552  | 0.9783947362  |
| C | -5.7787303212  | -0.6926736652 | -0.9783947574 |
| C | -7.1661391486  | 0.6930216555  | 0.9781033449  |
| C | -7.1661390857  | -0.6930215988 | -0.9781033957 |
| C | -7.8912121236  | 0.0000000120  | -0.0000000139 |
| C | -9.3684398414  | -0.0000000007 | -0.0000000108 |
| C | -10.0935768750 | -0.0290547118 | 1.1982539266  |
| C | -10.0935769718 | 0.0290547441  | -1.1982539480 |
| C | -11.4812096411 | -0.0288476185 | 1.1982898267  |
| C | -11.4812096874 | 0.0288475102  | -1.1982899037 |
| C | -12.2062338451 | 0.0000000040  | -0.0000000509 |
| C | -13.6836538139 | -0.0000000118 | -0.0000000113 |
| C | -14.4085614652 | -0.7449280836 | 0.9392803931  |
| C | -14.4085615739 | 0.7449282997  | -0.9392802255 |
| C | -15.7960321819 | -0.7447551707 | 0.9394579588  |
| C | -15.7960322244 | 0.7447553181  | -0.9394579020 |
| C | -16.5212017698 | 0.0000000525  | -0.0000000082 |
| C | -17.9985968986 | -0.0000000160 | -0.0000000066 |
| C | -18.7240119978 | -1.1578693007 | 0.3102199458  |
| C | -18.7240121191 | 1.1578692543  | -0.3102199675 |
| C | -20.1113911273 | -1.1575479402 | 0.3111099327  |

|   |                |               |               |
|---|----------------|---------------|---------------|
| C | -20.1113911836 | 1.1575479430  | -0.3111098938 |
| C | -20.8364927505 | -0.0000000104 | -0.0000000251 |
| C | -22.3134609426 | 0.0000000021  | 0.0000000058  |
| C | -23.0383453114 | -1.1139373802 | -0.4426927230 |
| C | -23.0383451723 | 1.1139373666  | 0.4426928371  |
| C | -24.4258748235 | -1.1140789240 | -0.4420638439 |
| C | -24.4258747501 | 1.1140790832  | 0.4420634919  |
| C | -25.1508654855 | -0.0000000935 | 0.0000002748  |
| C | -26.6295370618 | 0.0000000102  | -0.0000000208 |
| C | -27.3487779649 | -0.6059632814 | -1.0384945516 |
| C | -27.3487781120 | 0.6059633508  | 1.0384944698  |
| C | -28.7390691791 | -0.6061218879 | -1.0386126994 |
| C | -28.7390692463 | 0.6061215883  | 1.0386128683  |
| C | -29.4406727259 | 0.0000001330  | -0.0000000891 |
| H | 5.2461201489   | -1.2241263199 | 1.7621611723  |
| H | 7.6992351977   | -1.2543982923 | 1.7403280084  |
| H | 7.6992349900   | 1.2543985832  | -1.7403280084 |
| H | 5.2461200051   | 1.2241262785  | -1.7621608353 |
| H | 3.3837695087   | -2.0441236969 | 0.6516267755  |
| H | 0.9316489337   | -2.0318433433 | 0.6892999963  |
| H | 0.9316492113   | 2.0318435712  | -0.6892996861 |
| H | 3.3837695016   | 2.0441233494  | -0.6516267433 |
| H | 9.5609138708   | 0.0711026636  | 2.1441572291  |
| H | 9.5609138404   | -0.0711026206 | -2.1441571665 |
| H | 12.0138903441  | 0.0330756497  | 2.1451040163  |
| H | 12.0138904157  | -0.0330755124 | -2.1451041327 |
| H | 13.8747112054  | 1.3459618193  | 1.6699754726  |
| H | 13.8747112510  | -1.3459617196 | -1.6699752896 |
| H | 16.3291040940  | 1.3172772421  | 1.6933399187  |
| H | 16.3291041951  | -1.3172772975 | -1.6933398384 |
| H | 18.1910757487  | -2.0770873225 | -0.5367759612 |
| H | 18.1910757657  | 2.0770871326  | 0.5367759682  |
| H | 20.6449514679  | -2.0664467486 | -0.5747944123 |
| H | 20.6449514893  | 2.0664467413  | 0.5747944107  |
| H | -0.9316492216  | -2.0318433814 | -0.6892998941 |
| H | -0.9316492238  | 2.0318434738  | 0.6892998083  |
| H | -3.3837696230  | -2.0441233494 | -0.6516269441 |
| H | -3.3837697348  | 2.0441236188  | 0.6516265873  |
| H | -5.2461201345  | -1.2241263614 | -1.7621610826 |
| H | -5.2461202107  | 1.2241262461  | 1.7621609524  |
| H | -7.6992350300  | -1.2543982885 | -1.7403279222 |
| H | -7.6992351177  | 1.2543982718  | 1.7403279009  |
| H | -9.5609138855  | -0.0711027003 | 2.1441572620  |
| H | -9.5609138644  | 0.0711025658  | -2.1441571722 |
| H | -12.0138903850 | -0.0330755689 | 2.1451040243  |
| H | -12.0138903849 | 0.0330755176  | -2.1451041262 |
| H | -13.8747112195 | -1.3459618629 | 1.6699753841  |
| H | -13.8747112225 | 1.3459616685  | -1.6699753815 |
| H | -16.3291041233 | -1.3172772561 | 1.6933398540  |
| H | -16.3291041444 | 1.3172772537  | -1.6933399219 |
| H | -18.1910757306 | -2.0770872993 | 0.5367759440  |
| H | -18.1910757874 | 2.0770871542  | -0.5367759819 |
| H | -20.6449514357 | -2.0664467543 | 0.5747944448  |
| H | -20.6449515227 | 2.0664467276  | -0.5747944176 |
| H | -22.5057080115 | 1.9865822753  | 0.8102430635  |
| H | -22.5057080489 | -1.9865821673 | -0.8102429403 |
| H | -24.9587184433 | 2.0008140932  | 0.7741742089  |
| H | -24.9587185410 | -2.0008141307 | -0.7741740096 |
| H | -26.8103551504 | -1.0576600660 | -1.8670676174 |
| H | -26.8103551312 | 1.0576600788  | 1.8670673903  |
| H | -29.2766238140 | -1.0741426665 | -1.8584660266 |
| H | -29.2766238226 | 1.0741427044  | 1.8584660271  |
| H | -30.5267388300 | -0.0000000048 | -0.0000000060 |
| H | 22.5057080131  | 1.9865822651  | -0.8102430776 |
| H | 22.5057080446  | -1.9865821673 | 0.8102429560  |
| H | 24.9587184586  | 2.0008141110  | -0.7741741161 |
| H | 24.9587185239  | -2.0008141002 | 0.7741741336  |
| H | 26.8103551419  | -1.0576600419 | 1.8670676268  |
| H | 26.8103551380  | 1.0576600756  | -1.8670673947 |
| H | 29.2766238276  | -1.0741426959 | 1.8584659951  |
| H | 29.2766238137  | 1.0741426540  | -1.8584660669 |
| H | 30.5267388276  | 0.0000000019  | 0.0000000087  |

Cartesian coordinates (in Å) of [15]-paraphenylene optimized at the PBE0/6-31G(d,p) level of theory:

|   |                |               |               |
|---|----------------|---------------|---------------|
| C | -31.5855403659 | -0.4390291215 | -0.0667740266 |
| C | -30.9272705716 | 0.7652251669  | -0.3010140509 |
| C | -30.8419454584 | -1.5891383159 | 0.1840018429  |
| C | -29.5381174254 | 0.8191256063  | -0.2844857803 |
| C | -29.4530091555 | -1.5351647578 | 0.1989284361  |
| C | -28.7770021153 | -0.3304525906 | -0.0347553208 |
| C | -27.2995018009 | -0.2769674691 | -0.0211636861 |
| C | -26.5946943232 | 0.5319991835  | -0.9213830956 |
| C | -26.5564571801 | -1.0380171203 | 0.8903982371  |
| C | -25.2078877201 | 0.5770131170  | -0.9118391589 |
| C | -25.1696512635 | -0.9940800055 | 0.8994720990  |
| C | -24.4646990275 | -0.1860472837 | -0.0019090023 |
| C | -22.9879835700 | -0.1416376223 | 0.0050894365  |
| C | -22.2606451384 | -0.0447434980 | -1.1881693500 |
| C | -22.2665233238 | -0.1965181727 | 1.2044864264  |
| C | -20.8736088343 | -0.0060716475 | -1.1823790146 |
| C | -20.8794121689 | -0.1582174692 | 1.2101801706  |
| C | -20.1517624961 | -0.0627384845 | 0.0168565538  |
| C | -18.6751220159 | -0.0251360653 | 0.0224273072  |
| C | -17.9304245401 | -0.6631588232 | -0.9780552334 |
| C | -17.9700978773 | 0.6487975171  | 1.0280923885  |
| C | -16.5434585009 | -0.6298468154 | -0.9725420257 |
| C | -16.5829438517 | 0.6820515139  | 1.0337384421  |
| C | -15.8383927426 | 0.0430991107  | 0.0338746696  |
| C | -14.3617354415 | 0.0757206527  | 0.0396109982  |
| C | -13.6111394712 | -1.0345525229 | -0.3689038632 |
| C | -13.6619455208 | 1.2169749377  | 0.4526776033  |
| C | -12.2241565573 | -1.0045314154 | -0.3653931053 |
| C | -12.2747772999 | 1.2467234958  | 0.4571334057  |
| C | -11.5244100224 | 0.1366646378  | 0.0478733255  |
| C | -10.0475885837 | 0.1674163236  | 0.0509850959  |
| C | -9.3000357603  | -0.9661537197 | 0.3959831433  |
| C | -9.3449562681  | 1.3295609480  | -0.2932928867 |
| C | -7.9130454711  | -0.9390072649 | 0.3952828872  |
| C | -7.9577093389  | 1.3569812270  | -0.2929290192 |
| C | -7.2101561648  | 0.2227640117  | 0.0502011110  |
| C | -5.7332834909  | 0.2478208028  | 0.0456791588  |
| C | -4.9933820577  | -0.4600324275 | 1.0018479859  |
| C | -5.0232887690  | 0.9763766695  | -0.9176321295 |
| C | -3.6061022809  | -0.4433166878 | 0.9927199106  |
| C | -3.6359256401  | 0.9931740628  | -0.9266312691 |
| C | -2.8960660674  | 0.2825686836  | 0.0275074968  |
| C | -1.4188629209  | 0.2925670285  | 0.0137027660  |
| C | -0.6821230463  | 0.2952312101  | 1.2052756059  |
| C | -0.7054512754  | 0.2948318877  | -1.1918500354 |
| C | 0.7054514304   | 0.2948324989  | 1.1918502541  |
| C | 0.6821231582   | 0.2952306217  | -1.2052756628 |
| C | 1.4188627420   | 0.2925668219  | -0.0137026342 |
| C | 2.8960659273   | 0.2825688422  | -0.0275075413 |
| C | 3.6359254542   | 0.9931745259  | 0.9266309114  |
| C | 3.6061022467   | -0.4433171403 | -0.9927194728 |
| C | 5.0232886457   | 0.9763768560  | 0.9176316764  |
| C | 4.9933819711   | -0.4600326718 | -1.0018478022 |
| C | 5.7332835197   | 0.2478205832  | -0.0456791412 |
| C | 7.2101561817   | 0.2227639382  | -0.0502012985 |
| C | 7.9577092210   | 1.3569812504  | 0.2929285939  |
| C | 7.9130456150   | -0.9390073774 | -0.3952828707 |
| C | 9.3449561979   | 1.3295609387  | 0.2932925933  |
| C | 9.3000358519   | -0.9661538852 | -0.3959829413 |
| C | 10.0475885906  | 0.1674162823  | -0.0509852094 |
| C | 11.5244100297  | 0.1366646155  | -0.0478734767 |
| C | 12.2747772801  | 1.2467234234  | -0.4571337106 |
| C | 12.2241565875  | -1.0045312907 | 0.3653933441  |
| C | 13.6619454992  | 1.2169748379  | -0.4526780774 |
| C | 13.6111395019  | -1.0345524250 | 0.3689039391  |
| C | 14.3617354468  | 0.0757207086  | -0.0396110924 |
| C | 15.8383927472  | 0.0430991440  | -0.0338746639 |
| C | 16.5829439741  | 0.6820512630  | -1.0337385975 |
| C | 16.5434583736  | -0.6298465617 | 0.9725422077  |
| C | 17.9700979456  | 0.6487972729  | -1.0280925644 |

|   |                |               |               |
|---|----------------|---------------|---------------|
| C | 17.9304244715  | -0.6631585814 | 0.9780553705  |
| C | 18.6751220156  | -0.0251360464 | -0.0224273089 |
| C | 20.1517624928  | -0.0627384775 | -0.0168564984 |
| C | 20.8794121636  | -0.1582178072 | -1.2101800984 |
| C | 20.8736088356  | -0.0060713814 | 1.1823790464  |
| C | 22.2665233180  | -0.1965184912 | -1.2044863505 |
| C | 22.2606451411  | -0.0447432136 | 1.1881693863  |
| C | 22.9879835681  | -0.1416376454 | -0.0050893786 |
| C | 24.4646990250  | -0.1860473049 | 0.0019090771  |
| C | 25.1696512648  | -0.9940802116 | -0.8994718514 |
| C | 25.2078877191  | 0.5770133628  | 0.9118390125  |
| C | 26.5564571794  | -1.0380173402 | -0.8903979615 |
| C | 26.5946943230  | 0.5319994173  | 0.9213829774  |
| C | 27.2995018008  | -0.2769674315 | 0.0211637431  |
| C | 28.7770021134  | -0.3304525766 | 0.0347554035  |
| C | 29.4530091520  | -1.5351647991 | -0.1989280601 |
| C | 29.5381174230  | 0.8191256849  | 0.2844855672  |
| C | 30.8419454546  | -1.5891383567 | -0.1840014493 |
| C | 30.9272705689  | 0.7652252478  | 0.3010138551  |
| C | 31.5855403622  | -0.4390291015 | 0.0667741434  |
| H | -3.0606374412  | -1.0180230530 | 1.7359733178  |
| H | -5.5146047684  | -1.0188718949 | 1.7741163248  |
| H | -5.5680116368  | 1.5212238053  | -1.6836607611 |
| H | -3.1145140407  | 1.5795231381  | -1.6780212062 |
| H | -1.2054564929  | 0.3137442897  | 2.1571194705  |
| H | 1.2473642564   | 0.2750007463  | 2.1332275179  |
| H | 1.2054565575   | 0.3137434857  | -2.1571195633 |
| H | -1.2473640499  | 0.2750000683  | -2.1332273106 |
| H | -7.3624714392  | -1.8408530270 | 0.6480598853  |
| H | -7.4423518213  | 2.2788539961  | -0.5476645898 |
| H | -9.8151526241  | -1.8775666981 | 0.6862293228  |
| H | -9.8955954239  | 2.2201343058  | -0.5831539000 |
| H | -11.6716917193 | -1.8756242097 | -0.7062875159 |
| H | -11.7622636808 | 2.1406436090  | 0.8014330020  |
| H | -14.1239480883 | -1.9412521374 | -0.6775061566 |
| H | -14.2144158165 | 2.1014462133  | 0.7575049888  |
| H | -16.0660134198 | 1.1977205192  | 1.8383177423  |
| H | -15.9955147942 | -1.1197817724 | -1.7726116356 |
| H | -18.5187298278 | 1.1694724231  | 1.8080882301  |
| H | -18.4475406279 | -1.2086661174 | -1.7625306561 |
| H | 3.1145142468   | 1.5795240659  | 1.6780207536  |
| H | 3.0606373684   | -1.0180235276 | -1.7359726924 |
| H | 5.5680117614   | 1.5212242712  | 1.6836599103  |
| H | 5.5146045498   | -1.0188725676 | -1.7741159181 |
| H | 7.4423517909   | 2.2788542161  | 0.5476638326  |
| H | 7.3624714998   | -1.8408530896 | -0.6480596838 |
| H | 9.8955953372   | 2.2201343798  | 0.5831533947  |
| H | 9.8151527318   | -1.8775669082 | -0.6862289331 |
| H | 11.6716917674  | -1.8756240067 | 0.7062879840  |
| H | 11.7622636316  | 2.1406434263  | -0.8014335571 |
| H | 14.1239481667  | -1.9412518872 | 0.6775065817  |
| H | 14.2144157544  | 2.1014460948  | -0.7575056008 |
| H | 15.9955147695  | -1.1197812790 | 1.7726121102  |
| H | 16.0660134545  | 1.1977201259  | -1.8383178663 |
| H | 18.4475405393  | -1.2086656564 | 1.7625309637  |
| H | 18.5187299305  | 1.1694720105  | -1.8080884896 |
| H | 20.3389877558  | 0.0877868569  | 2.1234875157  |
| H | 20.3483800277  | -0.2223671604 | -2.1557837083 |
| H | 22.7908476185  | -0.0182888114 | 2.1360170537  |
| H | 22.8024196443  | -0.2529074991 | -2.1478615548 |
| H | 24.6197030603  | -1.6102176199 | -1.6052139377 |
| H | 24.6898503630  | 1.2269427143  | 1.6113607105  |
| H | 27.0761838737  | -1.6600677468 | -1.6137329778 |
| H | 27.1434212879  | 1.1190234747  | 1.6525261200  |
| H | 29.0332553880  | 1.7683977507  | 0.4404567077  |
| H | 28.8803833115  | -2.4431844869 | -0.3662054643 |
| H | 31.4983525111  | 1.6701614567  | 0.4886052859  |
| H | 31.3455258180  | -2.5356534463 | -0.3589977664 |
| H | 32.6707467780  | -0.4807357948 | 0.0790577457  |
| H | -20.3389877630 | 0.0877863687  | -2.1234875111 |
| H | -20.3483800222 | -0.2223665662 | 2.1557837907  |
| H | -22.7908476167 | -0.0182893416 | -2.1360170261 |
| H | -22.8024196466 | -0.2529069463 | 2.1478616444  |



|   |                |               |               |
|---|----------------|---------------|---------------|
| H | -24.6197030591 | -1.6102172118 | 1.6052143607  |
| H | -24.6898503627 | 1.2269423115  | -1.6113610044 |
| H | -27.0761838756 | -1.6600673581 | 1.6137333983  |
| H | -27.1434212842 | 1.1190230409  | -1.6525264019 |
| H | -29.0332553906 | 1.7683976337  | -0.4404571614 |
| H | -28.8803833167 | -2.4431844024 | 0.3662060800  |
| H | -31.4983525101 | 1.6701613316  | -0.4886057081 |
| H | -31.3455258248 | -2.5356533588 | 0.3589984110  |
| H | -32.6707467816 | -0.4807358154 | -0.0790576231 |

Cartesian coordinates (in Å) of [16]-paraphenylene optimized at the PBE0/6-31G(d,p) level of theory:

|   |                |               |               |
|---|----------------|---------------|---------------|
| C | -33.7338768853 | -0.5898571387 | -0.2355268262 |
| C | -32.9823600626 | -1.7294703806 | 0.0384672845  |
| C | -33.0845136478 | 0.6181037924  | -0.4754782555 |
| C | -31.5943641022 | -1.6614677444 | 0.0703941452  |
| C | -31.6962930798 | 0.6860582013  | -0.4418213860 |
| C | -30.9272296997 | -0.4529361662 | -0.1689556803 |
| C | -29.4506070478 | -0.3851764999 | -0.1382417854 |
| C | -28.7114691589 | -1.1297403054 | 0.7898991152  |
| C | -28.7426693016 | 0.4203276268  | -1.0391405991 |
| C | -27.3253622217 | -1.0731921074 | 0.8144613400  |
| C | -27.3565110289 | 0.4777883447  | -1.0142843089 |
| C | -26.6172303017 | -0.2688652658 | -0.0877830802 |
| C | -25.1411488378 | -0.2115902978 | -0.0640570502 |
| C | -24.4337715101 | -0.2470358036 | 1.1443892313  |
| C | -24.4003061708 | -0.1222523898 | -1.2496240428 |
| C | -23.0472183166 | -0.1972609516 | 1.1662108579  |
| C | -23.0138268101 | -0.0720922352 | -1.2277244065 |
| C | -22.3060853910 | -0.1093059329 | -0.0194207638 |
| C | -20.8299230197 | -0.0599896734 | 0.0029665993  |
| C | -20.1417603856 | 0.6302305316  | 1.0092605879  |
| C | -20.0689217807 | -0.7021165808 | -0.9825108780 |
| C | -18.7550314138 | 0.6747740735  | 1.0300593243  |
| C | -18.6824938163 | -0.6573516776 | -0.9619464461 |
| C | -17.9942011910 | 0.0317700639  | 0.0452246852  |
| C | -16.5179537099 | 0.0759843109  | 0.0663607540  |
| C | -15.8311898731 | 1.2266467307  | 0.4750303718  |
| C | -15.7549175792 | -1.0322961698 | -0.3241881240 |
| C | -14.4443941313 | 1.2674375146  | 0.4921802784  |
| C | -14.3683440450 | -0.9912373911 | -0.3079556297 |
| C | -13.6815527517 | 0.1595199329  | 0.1006179027  |
| C | -12.2050746252 | 0.2019695411  | 0.1157146195  |
| C | -11.5087555964 | 1.3661920178  | -0.2343005362 |
| C | -11.4515361515 | -0.9224485256 | 0.4771975905  |
| C | -10.1217826923 | 1.4040385686  | -0.2247548369 |
| C | -10.0648257220 | -0.8849301773 | 0.4855143569  |
| C | -9.3681983270  | 0.2786936446  | 0.1340162029  |
| C | -7.8915066692  | 0.3133166782  | 0.1361902587  |
| C | -7.1819446254  | 1.0379210264  | -0.8304320337 |
| C | -7.1511945143  | -0.3830018736 | 1.1004511991  |
| C | -5.7946858004  | 1.0612356514  | -0.8353253699 |
| C | -5.7639831714  | -0.3598045100 | 1.0954261919  |
| C | -5.0543864401  | 0.3611250052  | 0.1261870372  |
| C | -3.5771875365  | 0.3753469763  | 0.1147804231  |
| C | -2.8624605541  | 0.3693751320  | -1.0899973401 |
| C | -2.8417261474  | 0.3884520662  | 1.3070413960  |
| C | -1.4749272738  | 0.3720386987  | -1.1019378118 |
| C | -1.4541010420  | 0.3901952574  | 1.2951179197  |
| C | -0.7394303366  | 0.3798048525  | 0.0903431807  |
| C | 0.7378360793   | 0.3708886402  | 0.0776879383  |
| C | 1.4485672359   | -0.3614977201 | -0.8821048100 |
| C | 1.4770291524   | 1.0888821088  | 1.0267993532  |
| C | 2.8357797523   | -0.3769360159 | -0.8911659909 |
| C | 2.8644364141   | 1.0731199251  | 1.0180187823  |
| C | 3.5751233440   | 0.3386115249  | 0.0597282402  |
| C | 5.0520341343   | 0.3150721982  | 0.0539629563  |
| C | 5.7555370226   | -0.8475178826 | -0.2871997304 |
| C | 5.7991161439   | 1.4513529423  | 0.3912014412  |
| C | 7.1425003408   | -0.8728145646 | -0.2918772504 |
| C | 7.1863941291   | 1.4256983006  | 0.3879225207  |
| C | 7.8896325799   | 0.2631891947  | 0.0460260162  |
| C | 9.3665142928   | 0.2346479513  | 0.0419253823  |
| C | 10.0701602246  | -0.9049661421 | 0.4530239062  |
| C | 10.1132234018  | 1.3446340230  | -0.3741583001 |
| C | 11.4571419956  | -0.9340665129 | 0.4463923478  |
| C | 11.5003791993  | 1.3159756274  | -0.3793808396 |
| C | 12.2040713441  | 0.1757296856  | 0.0299014332  |
| C | 13.6807121332  | 0.1428426639  | 0.0218409662  |
| C | 14.3957822287  | -0.5325238980 | 1.0195240492  |
| C | 14.4155096614  | 0.7831842590  | -0.9844093496 |
| C | 15.7826861542  | -0.5679844226 | 1.0100033846  |

|   |                |               |               |
|---|----------------|---------------|---------------|
| C | 15.8025232593  | 0.7481592355  | -0.9935528626 |
| C | 16.5175601955  | 0.0707293596  | 0.0027162961  |
| C | 17.9940516486  | 0.0288249348  | -0.0098628050 |
| C | 18.7316177317  | 0.0742953399  | 1.1803309682  |
| C | 18.7061514087  | -0.0602058713 | -1.2130048322 |
| C | 20.1184649104  | 0.0305618712  | 1.1680520856  |
| C | 20.0930141222  | -0.1027933832 | -1.2254298954 |
| C | 20.8302539104  | -0.0597439727 | -0.0350738177 |
| C | 22.3066698935  | -0.1097624207 | -0.0475432278 |
| C | 23.0648426045  | 0.6378584630  | 0.8629890704  |
| C | 22.9972358383  | -0.9082074060 | -0.9684727876 |
| C | 24.4513445833  | 0.5880637588  | 0.8537824438  |
| C | 24.3837331651  | -0.9570197870 | -0.9784173184 |
| C | 25.1420006116  | -0.2107287062 | -0.0667393892 |
| C | 26.6180374734  | -0.2678090939 | -0.0749652335 |
| C | 27.3907189759  | 0.8686421034  | 0.1972155397  |
| C | 27.2938258605  | -1.4627664505 | -0.3540806014 |
| C | 28.7771342893  | 0.8118468536  | 0.1902966373  |
| C | 28.6800981395  | -1.5188816503 | -0.3624441357 |
| C | 29.4525288181  | -0.3824058528 | -0.0911276684 |
| C | 30.9297846842  | -0.4406181989 | -0.1014522043 |
| C | 31.6876347319  | 0.6268476429  | -0.6007924474 |
| C | 31.6093707569  | -1.5638870864 | 0.3878984287  |
| C | 33.0767577715  | 0.5737575250  | -0.6092778397 |
| C | 32.9984702668  | -1.6180442138 | 0.3780074763  |
| C | 33.7386684789  | -0.5492145636 | -0.1200486436 |
| H | -0.9132910186  | 0.3786357983  | 2.2372481374  |
| H | -3.3662117531  | 0.4134726322  | 2.2581086548  |
| H | -3.4032149303  | 0.3411519150  | -2.0317975680 |
| H | -0.9505756122  | 0.3841531020  | -2.0533115531 |
| H | 0.9550453987   | 1.6801614546  | 1.7738970061  |
| H | 3.4086074608   | 1.6239794607  | 1.7800909992  |
| H | 3.3575041738   | -0.9402716229 | -1.6597742781 |
| H | 0.9036517105   | -0.9419392966 | -1.6212593742 |
| H | -5.2183017883  | -0.9262719919 | 1.8448456051  |
| H | -5.2737478264  | 1.6440415036  | -1.5897959705 |
| H | -7.6720326080  | -0.9382330489 | 1.8755683830  |
| H | -7.7267012497  | 1.5743067123  | -1.6023578431 |
| H | -9.5095163414  | -1.7803365405 | 0.7504250947  |
| H | -9.6116274030  | 2.3273007749  | -0.4848162272 |
| H | -11.9617745311 | -1.8349047677 | 0.7726577814  |
| H | -12.0638738487 | 2.2498246152  | -0.5365129961 |
| H | -13.9420828755 | 2.1686263957  | 0.8324860140  |
| H | -13.8056668763 | -1.8610976794 | -0.6349673456 |
| H | -16.3934687409 | 2.1096441526  | 0.7658158900  |
| H | -16.2579773469 | -1.9456767950 | -0.6290052231 |
| H | 5.2833573747   | 2.3737398233  | 0.6432001642  |
| H | 5.2054965661   | -1.7510761481 | -0.5348473672 |
| H | 7.7366022234   | 2.3182018699  | 0.6725788988  |
| H | 7.6578748645   | -1.7847093629 | -0.5800710284 |
| H | 9.5977094845   | 2.2374766398  | -0.7166916184 |
| H | 9.5210293573   | -1.7758961874 | 0.7996087185  |
| H | 12.0498554200  | 2.2003384815  | -0.6898045839 |
| H | 11.9725363095  | -1.8401361885 | 0.7524900348  |
| H | 13.8560317376  | -1.0234673812 | 1.8245169805  |
| H | 13.8908374362  | 1.3008949313  | -1.7826165742 |
| H | 16.3071351767  | -1.1162364792 | 1.7876555775  |
| H | 16.3433366787  | 1.2695681735  | -1.7784797928 |
| H | 18.2096935154  | 0.1629419134  | 2.1290124320  |
| H | 18.1630806107  | -0.1160531420 | -2.1522426460 |
| H | 20.6606414860  | 0.0478069670  | 2.1092927008  |
| H | 20.6161502093  | -0.1533200689 | -2.1762346935 |
| H | 22.5592081937  | 1.2802014326  | 1.5784383016  |
| H | 22.4363316175  | -1.5129726023 | -1.6754356515 |
| H | 25.0105370098  | 1.1636364904  | 1.5860411564  |
| H | 24.8907301642  | -1.5706050640 | -1.7178156120 |
| H | 26.7225566594  | -2.3659558588 | -0.5496035435 |
| H | 26.8961769577  | 1.8144286407  | 0.4000096427  |
| H | 29.1752366782  | -2.4559580967 | -0.6012892496 |
| H | 29.3493764404  | 1.7056453783  | 0.4228172514  |
| H | 31.1795950786  | 1.4949048710  | -1.0116821000 |
| H | 31.0416981165  | -2.3907528900 | 0.8054442412  |
| H | 33.6443265166  | 1.4096421994  | -1.0083836722 |

|   |                |               |               |
|---|----------------|---------------|---------------|
| H | 33.5051354774  | -2.4953187119 | 0.7702169513  |
| H | 34.8238575139  | -0.5914847282 | -0.1275134597 |
| H | -18.1214576158 | -1.1508290760 | -1.7506301998 |
| H | -18.2512946498 | 1.2028357009  | 1.8349449371  |
| H | -20.5728355599 | -1.2597229245 | -1.7670088118 |
| H | -20.7033318045 | 1.1547826768  | 1.7773405004  |
| H | -22.5272087862 | -0.2462412944 | 2.1187978309  |
| H | -22.4687277341 | 0.0157645634  | -2.1633646352 |
| H | -24.9806495237 | -0.2972073188 | 2.0817891131  |
| H | -24.9190888527 | -0.1108811492 | -2.2040556550 |
| H | -26.8360277798 | 1.1243609213  | -1.7150872558 |
| H | -26.7783335486 | -1.6764516605 | 1.5334711159  |
| H | -29.2879397314 | 0.9946347576  | -1.7828495446 |
| H | -29.2340584629 | -1.7485390740 | 1.5139495858  |
| H | -31.0151578111 | -2.5617755843 | 0.2555855035  |
| H | -31.1988873237 | 1.6384102104  | -0.6027390477 |
| H | -33.4787375118 | -2.6788624254 | 0.2183317140  |
| H | -33.6619464858 | 1.5150484781  | -0.6810458506 |
| H | -34.8183295514 | -0.6425831476 | -0.2612059663 |

Cartesian coordinates (in Å) of [17]-paraphenylene optimized at the PBE0/6-31G(d,p) level of theory:

|   |                |               |               |
|---|----------------|---------------|---------------|
| C | 35.9014753765  | -0.4908260875 | 0.0290119367  |
| C | 35.1625185158  | -1.5685939873 | 0.5093859983  |
| C | 35.2379909090  | 0.6329117799  | -0.4563280343 |
| C | 33.7731169310  | -1.5223873581 | 0.5058014479  |
| C | 33.8485663435  | 0.6780836532  | -0.4612345050 |
| C | 33.0919322436  | -0.3983922143 | 0.0203228908  |
| C | 31.6142955964  | -0.3490522041 | 0.0159222706  |
| C | 30.8515825529  | -1.4876027803 | -0.2735881735 |
| C | 30.9287041842  | 0.8383908007  | 0.3015990930  |
| C | 29.4649533639  | -1.4401289199 | -0.2784166022 |
| C | 29.5419756386  | 0.8865445709  | 0.2953308374  |
| C | 28.7789983243  | -0.2520052147 | 0.0050742974  |
| C | 27.3026022209  | -0.2036448097 | -0.0000650121 |
| C | 26.5568881731  | -0.9461789390 | -0.9250291758 |
| C | 26.5991264034  | 0.5836623454  | 0.9207468474  |
| C | 25.1701165953  | -0.9045066434 | -0.9278463070 |
| C | 25.2123669686  | 0.6261676855  | 0.9173222191  |
| C | 24.4667498098  | -0.1177648143 | -0.0064441837 |
| C | 22.9900091252  | -0.0749881796 | -0.0080859998 |
| C | 22.2648626442  | -0.1105367132 | -1.2060531761 |
| C | 22.2658206943  | 0.0008531201  | 1.1886694655  |
| C | 20.8777484972  | -0.0740297131 | -1.2071092247 |
| C | 20.8787163054  | 0.0383694923  | 1.1874851393  |
| C | 20.1532883128  | 0.0008371402  | -0.0103728713 |
| C | 18.6765474312  | 0.0374085702  | -0.0116210261 |
| C | 17.9685756376  | 0.7226264265  | -1.0075906107 |
| C | 17.9345198123  | -0.6135600569 | 0.9825265865  |
| C | 16.5814359289  | 0.7542546520  | -1.0101274301 |
| C | 16.5475090442  | -0.5815951732 | 0.9803080534  |
| C | 15.8395231812  | 0.1023891421  | -0.0166025540 |
| C | 14.3627985887  | 0.1329873753  | -0.0199201415 |
| C | 13.6608435029  | 1.2765499877  | -0.4228774371 |
| C | 13.6141098058  | -0.9816311366 | 0.3802519701  |
| C | 12.2736751270  | 1.3040341106  | -0.4265996402 |
| C | 12.2270891559  | -0.9537191982 | 0.3779105146  |
| C | 11.5251798229  | 0.1894467876  | -0.0262874776 |
| C | 10.0482745699  | 0.2174646729  | -0.0297008054 |
| C | 9.3431736784   | 1.3766395131  | 0.3196043763  |
| C | 9.3029241490   | -0.9155464605 | -0.3813229368 |
| C | 7.9559218950   | 1.4017889105  | 0.3174760531  |
| C | 7.9159032040   | -0.8907904068 | -0.3819924413 |
| C | 7.2105722669   | 0.2682385129  | -0.0325874498 |
| C | 5.7336518007   | 0.2913512673  | -0.0308923999 |
| C | 5.0205601758   | 1.0166502879  | 0.9326161698  |
| C | 4.9966524405   | -0.4154061606 | -0.9901150669 |
| C | 3.6331780639   | 1.0323624516  | 0.9381058293  |
| C | 3.6093749698   | -0.3999902824 | -0.9843544165 |
| C | 2.8962410481   | 0.3231767296  | -0.0193567291 |
| C | 1.4189608450   | 0.3324819980  | -0.0097465900 |
| C | 0.7020998803   | 0.3342262314  | 1.1937966386  |
| C | 0.6854948115   | 0.3348218892  | -1.2033017133 |
| C | -0.6854946731  | 0.3348218777  | 1.2033015579  |
| C | -0.7020997906  | 0.3342264064  | -1.1937967119 |
| C | -1.4189608688  | 0.3324819328  | 0.0097464335  |
| C | -2.8962410528  | 0.3231767960  | 0.0193566404  |
| C | -3.6093751414  | -0.3999901721 | 0.9843543275  |
| C | -3.6331781156  | 1.0323625829  | -0.9381057698 |
| C | -4.9966525560  | -0.4154061536 | 0.9901152766  |
| C | -5.0205602696  | 1.0166503356  | -0.9326161704 |
| C | -5.7336517871  | 0.2913509579  | 0.0308922501  |
| C | -7.2105722533  | 0.2682384949  | 0.0325877215  |
| C | -7.9159033379  | -0.8907904837 | 0.3819924281  |
| C | -7.9559217684  | 1.4017888524  | -0.3174759511 |
| C | -9.3029242334  | -0.9155465723 | 0.3813227705  |
| C | -9.3431735922  | 1.3766394181  | -0.3196044487 |
| C | -10.0482745778 | 0.2174646875  | 0.0297010059  |
| C | -11.5251798279 | 0.1894468745  | 0.0262873682  |
| C | -12.2270891588 | -0.9537191590 | -0.3779104913 |
| C | -12.2736751259 | 1.3040341409  | 0.4265996938  |
| C | -13.6141098069 | -0.9816310948 | -0.3802519463 |

|   |                |               |               |
|---|----------------|---------------|---------------|
| C | -13.6608435071 | 1.2765500110  | 0.4228774930  |
| C | -14.3627985939 | 0.1329874361  | 0.0199200910  |
| C | -15.8395231865 | 0.1023891878  | 0.0166025461  |
| C | -16.5475090661 | -0.5815951907 | -0.9803080097 |
| C | -16.5814359168 | 0.7542546071  | 1.0101274931  |
| C | -17.9345198347 | -0.6135600579 | -0.9825265229 |
| C | -17.9685756254 | 0.7226263962  | 1.0075906918  |
| C | -18.6765474348 | 0.0374085649  | 0.0116211014  |
| C | -20.1532883118 | 0.0008370646  | 0.0103728712  |
| C | -20.8787161942 | 0.0383696242  | -1.1874851500 |
| C | -20.8777486110 | -0.0740296770 | 1.2071092099  |
| C | -22.2658206262 | 0.0008532603  | -1.1886694747 |
| C | -22.2648627187 | -0.1105365387 | 1.2060531750  |
| C | -22.9900091176 | -0.0749882648 | 0.0080859732  |
| C | -24.4667498063 | -0.1177648387 | 0.0064441603  |
| C | -25.2123669693 | 0.6261676229  | -0.9173222674 |
| C | -25.1701165848 | -0.9045067280 | 0.9278462404  |
| C | -26.5991264062 | 0.5836623191  | -0.9207468588 |
| C | -26.5568881631 | -0.9461789893 | 0.9250291442  |
| C | -27.3026022169 | -0.2036448185 | 0.0000650168  |
| C | -28.7789983202 | -0.2520052453 | -0.0050743241 |
| C | -29.5419756660 | 0.8865445325  | -0.2953308229 |
| C | -29.4649533301 | -1.4401289589 | 0.2784166000  |
| C | -30.9287042081 | 0.8383906962  | -0.3015991528 |
| C | -30.8515825196 | -1.4876028858 | 0.2735881063  |
| C | -31.6142955898 | -0.3490523212 | -0.0159222994 |
| C | -33.0919322410 | -0.3983922122 | -0.0203228712 |
| C | -33.8485661897 | 0.6780837395  | 0.4612344259  |
| C | -33.7731171065 | -1.5223872430 | -0.5058015778 |
| C | -35.2379908193 | 0.6329117675  | 0.4563281579  |
| C | -35.1625186185 | -1.5685939806 | -0.5093859188 |
| C | -35.9014753953 | -0.4908259052 | -0.0290121881 |
| H | -1.2411503449  | 0.3143328654  | -2.1367909654 |
| H | 1.2114914145   | 0.3536000546  | -2.1536640640 |
| H | 1.2411504571   | 0.3143325051  | 2.1367908645  |
| H | -1.2114912457  | 0.3535997541  | 2.1536639369  |
| H | -3.1094459569  | 1.61672202625 | -1.6894114276 |
| H | -5.5627657993  | 1.5605407147  | -1.7010888965 |
| H | -5.5201779111  | -0.9716664649 | 1.7626761589  |
| H | -3.0664595153  | -0.9735855438 | 1.7303137997  |
| H | 3.0664596332   | -0.9735858507 | -1.7303139948 |
| H | 3.1094458139   | 1.61672200576 | 1.6894114086  |
| H | 5.5201781134   | -0.9716662720 | -1.7626758628 |
| H | 5.5627656226   | 1.5605407397  | 1.7010888823  |
| H | 7.3672790937   | -1.7923172992 | -0.6399905084 |
| H | 7.4388822680   | 2.3217137406  | 0.5757715091  |
| H | 9.8197462666   | -1.8246438177 | -0.6756986632 |
| H | 9.8917367311   | 2.2667384435  | 0.6147330234  |
| H | 11.7596700807  | 2.1998352407  | -0.7636470630 |
| H | 11.6763121535  | -1.8284790400 | 0.7120451819  |
| H | 14.2116564132  | 2.1643878393  | -0.7207280614 |
| H | 14.1283996346  | -1.8901222286 | 0.6809677192  |
| H | -7.4388821949  | 2.3217137938  | -0.5757712571 |
| H | -7.3672791695  | -1.7923172215 | 0.6399906689  |
| H | -9.8917366108  | 2.2667384403  | -0.6147328973 |
| H | -9.8197463809  | -1.8246438830 | 0.6756986132  |
| H | -11.7596700869 | 2.1998352857  | 0.7636470695  |
| H | -11.6763121528 | -1.8284789718 | -0.7120452366 |
| H | -14.2116564094 | 2.1643878812  | 0.7207280744  |
| H | -14.1283996367 | -1.8901221645 | -0.6809677669 |
| H | -16.0018710811 | -1.0817111068 | -1.7756340528 |
| H | -16.0623350714 | 1.2786954458  | 1.8075892016  |
| H | -18.4536499478 | -1.1678146390 | -1.7594642540 |
| H | -18.5150019972 | 1.2532438548  | 1.7823765563  |
| H | -20.3470394482 | 0.1161027774  | -2.1316894617 |
| H | -20.3443462346 | -0.1233816617 | 2.1522313456  |
| H | -22.7983495220 | 0.0117500299  | -2.1355040329 |
| H | -22.7976954118 | -0.1501185625 | 2.1519907710  |
| H | -24.6962667654 | 1.2592296718  | -1.6335360608 |
| H | -24.6190863717 | -1.5058243187 | 1.6454197138  |
| H | -27.1485030031 | 1.1557430308  | -1.6631177858 |
| H | -27.0740669390 | -1.5508275076 | 1.6647384122  |
| H | -28.9013136966 | -2.3449481750 | 0.4880552760  |

|   |                |               |               |
|---|----------------|---------------|---------------|
| H | -29.0395186914 | 1.8273600822  | -0.5018238983 |
| H | -31.3548828976 | -2.4193606186 | 0.5161641429  |
| H | -31.4929498026 | 1.7335827764  | -0.5478884627 |
| H | -33.3397171134 | 1.5471866030  | 0.8689312521  |
| H | -33.2059932156 | -2.3564520073 | -0.9095702411 |
| H | -35.8047017466 | 1.4757844686  | 0.8416731859  |
| H | -35.6702929984 | -2.4466205290 | -0.8984173325 |
| H | -36.9869354030 | -0.5268873322 | -0.0319826469 |
| H | 16.0018710378  | -1.0817111575 | 1.7756340394  |
| H | 16.0623351061  | 1.2786954430  | -1.8075891805 |
| H | 18.4536499059  | -1.1678146541 | 1.7594643204  |
| H | 18.5150020288  | 1.2532438875  | -1.7823764602 |
| H | 20.3443462110  | -0.1233817802 | -2.1522314447 |
| H | 20.3470394782  | 0.1161026245  | 2.1316893649  |
| H | 22.7976953525  | -0.1501186558 | -2.1519907662 |
| H | 22.7983495742  | 0.0117498672  | 2.1355040339  |
| H | 24.6962667625  | 1.2592297102  | 1.6335360309  |
| H | 24.6190863831  | -1.5058242363 | -1.6454197795 |
| H | 27.1485029910  | 1.1557430189  | 1.6631178150  |
| H | 27.0740669505  | -1.5508274752 | -1.6647384289 |
| H | 28.9013137582  | -2.3449481498 | -0.4880553030 |
| H | 29.0395186295  | 1.8273601005  | 0.5018239082  |
| H | 31.3548829644  | -2.4193605052 | -0.5161641789 |
| H | 31.4929497471  | 1.7335828852  | 0.5478884501  |
| H | 33.2059931820  | -2.3564521397 | 0.9095704055  |
| H | 33.3397171464  | 1.5471865309  | -0.8689310310 |
| H | 35.6702929396  | -2.4466205756 | 0.8984172842  |
| H | 35.8047018087  | 1.4757844559  | -0.8416731453 |
| H | 36.9869353852  | -0.5268874599 | 0.0319826355  |

Cartesian coordinates (in Å) of [18]-paraphenylene optimized at the PBE0/6-31G(d,p) level of theory:

|   |                |               |               |
|---|----------------|---------------|---------------|
| C | 38.0579507178  | 0.3261899353  | -0.3320583621 |
| C | 37.3257045393  | 1.4395025287  | -0.7355128388 |
| C | 37.3876789711  | -0.8148469936 | 0.1007208806  |
| C | 35.9362343872  | 1.4119070570  | -0.7061546618 |
| C | 35.9981364179  | -0.8417702911 | 0.1308234183  |
| C | 35.2482810280  | 0.2709265200  | -0.2726027961 |
| C | 33.7703505622  | 0.2427816104  | -0.2402023127 |
| C | 33.0321370332  | 1.3724153714  | 0.1349612696  |
| C | 33.0601047720  | -0.9144282596 | -0.5837004591 |
| C | 31.6452897971  | 1.3457644186  | 0.1659332558  |
| C | 31.6732357975  | -0.9416395693 | -0.5519240648 |
| C | 30.9346355372  | 0.1880117647  | -0.1763631005 |
| C | 29.4581352567  | 0.1601061835  | -0.1435622723 |
| C | 28.7416399551  | 0.8495206886  | 0.8433888156  |
| C | 28.7254763756  | -0.5558311135 | -1.0991359845 |
| C | 27.3546704828  | 0.8254011227  | 0.8724962692  |
| C | 27.3386638546  | -0.5800151586 | -1.0699529188 |
| C | 26.6220258820  | 0.1107415154  | -0.0841301986 |
| C | 25.1451935816  | 0.0871481407  | -0.0566331176 |
| C | 24.4415605664  | 0.0569240150  | 1.1542195669  |
| C | 24.3991019330  | 0.0948179063  | -1.2423634276 |
| C | 23.0542592796  | 0.0352793090  | 1.1779496539  |
| C | 23.0119986028  | 0.0723644633  | -1.2186912369 |
| C | 22.3083788937  | 0.0420181816  | -0.0078746895 |
| C | 20.8314421168  | 0.0185109955  | 0.0170566726  |
| C | 20.1340854965  | -0.7279409773 | 0.9757278366  |
| C | 20.0794202512  | 0.7418177205  | -0.9178420482 |
| C | 18.7470229431  | -0.7494735520 | 0.9990103498  |
| C | 18.6924166166  | 0.7199733269  | -0.8948523918 |
| C | 17.9949337930  | -0.0257933286 | 0.0644095808  |
| C | 16.5181969903  | -0.0492579172 | 0.0887091345  |
| C | 15.8172125982  | -1.2150641836 | 0.4239309835  |
| C | 15.7690126050  | 1.0927000846  | -0.2237633472 |
| C | 14.4303050231  | -1.2381381131 | 0.4461182285  |
| C | 14.3820155356  | 1.0693237176  | -0.2028164574 |
| C | 13.6811333664  | -0.0964495912 | 0.1328328800  |
| C | 12.2043431816  | -0.1205875649 | 0.1528832324  |
| C | 11.4916135717  | -1.2508521985 | -0.2681121144 |
| C | 11.4667465361  | 0.9872079808  | 0.5904351680  |
| C | 10.1045006748  | -1.2717307285 | -0.2537990909 |
| C | 10.0796244050  | 0.9668351811  | 0.6032815736  |
| C | 9.3667203649   | -0.1626877060 | 0.1805014537  |
| C | 7.8899232698   | -0.1817639889 | 0.1886697659  |
| C | 7.1686077564   | -0.8335852196 | -0.8200756052 |
| C | 7.1611372854   | 0.4538812093  | 1.2022216950  |
| C | 5.7813338501   | -0.8471689561 | -0.8165527350 |
| C | 5.7737579395   | 0.4407393696  | 1.2054115965  |
| C | 5.0524678403   | -0.2089891277 | 0.1954040921  |
| C | 3.5754783883   | -0.2172575503 | 0.1950487569  |
| C | 2.8514452322   | -0.1320979219 | -1.0011811897 |
| C | 2.8493462281   | -0.3075167047 | 1.3896669581  |
| C | 1.4639797822   | -0.1356363701 | -1.0027409351 |
| C | 1.4617238301   | -0.3101164394 | 1.3882704733  |
| C | 0.7379419822   | -0.2235320227 | 0.1920170960  |
| C | -0.7395268615  | -0.2224358593 | 0.1899675899  |
| C | -1.4613900691  | 0.5658662348  | -0.7157168349 |
| C | -1.4671726085  | -1.0083499028 | 1.0931616294  |
| C | -2.8486749573  | 0.5679999842  | -0.7183999933 |
| C | -2.8546074706  | -1.0053664927 | 1.0912827885  |
| C | -3.5764420638  | -0.2171880524 | 0.1853745906  |
| C | -5.0537462148  | -0.2133420551 | 0.1820679729  |
| C | -5.7743455271  | 0.9611015694  | -0.0711495476 |
| C | -5.7830604088  | -1.3835184525 | 0.4300997423  |
| C | -7.1616647579  | 0.9647921097  | -0.0782246587 |
| C | -7.1704974632  | -1.3795872085 | 0.4238873376  |
| C | -7.8912010266  | -0.2055787369 | 0.1685304473  |
| C | -9.3682405110  | -0.2014389943 | 0.1572971602  |
| C | -10.0942991338 | 0.8903743025  | 0.6506354303  |
| C | -10.0926489539 | -1.2880124177 | -0.3499825444 |
| C | -11.4815698854 | 0.8964558773  | 0.6350004985  |



|   |                |               |               |
|---|----------------|---------------|---------------|
| C | -11.4800058498 | -1.2824105302 | -0.3645470601 |
| C | -12.2059480648 | -0.1893317227 | 0.1262127321  |
| C | -13.6826645670 | -0.1795358624 | 0.1051785479  |
| C | -14.4192362812 | 0.3923571798  | 1.1504927723  |
| C | -14.3958653846 | -0.7385328189 | -0.9632111822 |
| C | -15.8063931626 | 0.4072541927  | 1.1273172784  |
| C | -15.7830097449 | -0.7240057414 | -0.9862326029 |
| C | -16.5195294774 | -0.1492468933 | 0.0576505390  |
| C | -17.9959513031 | -0.1261107910 | 0.0293710472  |
| C | -18.7471215899 | -0.2987665772 | 1.1992615343  |
| C | -18.6940178801 | 0.0733589210  | -1.1687010888 |
| C | -20.1339441784 | -0.2703750576 | 1.1723881924  |
| C | -20.0809440142 | 0.1010100916  | -1.1957069946 |
| C | -20.8319979096 | -0.0687730047 | -0.0254241728 |
| C | -22.3085992500 | -0.0336909484 | -0.0513500158 |
| C | -23.0675465108 | -0.8721696251 | 0.7759212162  |
| C | -22.9988205209 | 0.8410704013  | -0.9002630037 |
| C | -24.4542832411 | -0.8351818181 | 0.7568772883  |
| C | -24.3855324454 | 0.8765553822  | -0.9208561415 |
| C | -25.1444706550 | 0.0401129399  | -0.0915185794 |
| C | -26.6209307427 | 0.0837772058  | -0.1102216464 |
| C | -27.3844587992 | -1.0812503554 | 0.0390427268  |
| C | -27.3063039720 | 1.2941084326  | -0.2770614789 |
| C | -28.7712032227 | -1.0375401038 | 0.0226647108  |
| C | -28.6928664842 | 1.3375379672  | -0.2945158504 |
| C | -29.4566433391 | 0.1726225199  | -0.1447080540 |
| C | -30.9328412873 | 0.2188628270  | -0.1636031682 |
| C | -31.6827690273 | -0.8046038212 | -0.7574500361 |
| C | -31.6320275856 | 1.2876481608  | 0.4118516424  |
| C | -33.0695288876 | -0.7609181096 | -0.7754381898 |
| C | -33.0187535639 | 1.3316368127  | 0.3925611516  |
| C | -33.7683363607 | 0.3087639625  | -0.2016623907 |
| C | -35.2456826714 | 0.3573138923  | -0.2245948618 |
| C | -35.9624474574 | -0.0901543010 | -1.3423218629 |
| C | -35.9668026275 | 0.8531321392  | 0.8695607075  |
| C | -37.3515886351 | -0.0442029648 | -1.3650341164 |
| C | -37.3559220448 | 0.9008515397  | 0.8465797340  |
| C | -38.0548813881 | 0.4521530019  | -0.2707906871 |
| H | 0.9279913887   | -0.3615036349 | 2.3330588638  |
| H | 3.3816254647   | -0.3943652700 | 2.3327029195  |
| H | 3.3852146792   | -0.0421567289 | -1.9430609281 |
| H | 0.9320377734   | -0.0864931884 | -1.9486299576 |
| H | -0.9353987263  | -1.6431646711 | 1.7960949409  |
| H | -3.3907893470  | -1.6096904175 | 1.8174752381  |
| H | -3.3802150778  | 1.1739310556  | -1.4466408457 |
| H | -0.9249562489  | 1.1988942678  | -1.4167032103 |
| H | 5.2379157342   | 0.9599751935  | 1.9951287959  |
| H | 5.2515325676   | -1.3759081776 | -1.6040127608 |
| H | 7.6906525845   | 0.9523001899  | 2.0093920513  |
| H | 7.7037330182   | -1.3212217043 | -1.6301144425 |
| H | 9.5373545555   | 1.8501784837  | 0.9287652950  |
| H | 9.5820366961   | -2.1702971112 | -0.5697832749 |
| H | 11.9895695613  | 1.8720627230  | 0.9423058794  |
| H | 12.0333247045  | -2.1200732226 | -0.6301933709 |
| H | 13.9168654436  | -2.1529077130 | 0.7284595586  |
| H | 13.8296400817  | 1.9662336712  | -0.4686882440 |
| H | 16.3689772988  | -2.1224851748 | 0.6527536165  |
| H | 16.2833481384  | 2.0173347957  | -0.4701091731 |
| H | -5.2527172132  | -2.3139921239 | 0.6121849169  |
| H | -5.2373319045  | 1.8887477824  | -0.2480333503 |
| H | -7.7075231333  | -2.2995791132 | 0.6372403379  |
| H | -7.6915236890  | 1.8876209398  | -0.2971111953 |
| H | -9.5596721766  | -2.1425955107 | -0.7572375326 |
| H | -9.5631359215  | 1.7405915084  | 1.0692197995  |
| H | -12.0118874466 | -2.1486273607 | -0.7481133249 |
| H | -12.0143785612 | 1.7673913495  | 1.0063453531  |
| H | -13.8964368032 | 0.8172964906  | 2.0027912707  |
| H | -13.8539823442 | -1.1740555268 | -1.7980617469 |
| H | -16.3475822857 | 0.8773694619  | 1.9436852239  |
| H | -16.3067307859 | -1.1814905888 | -1.8210021205 |
| H | -18.2348371238 | -0.4745530843 | 2.1410397042  |
| H | -18.1392891162 | 0.2281625438  | -2.0898808405 |
| H | -20.6878759485 | -0.3879281423 | 2.0994753502  |

|   |                |               |               |
|---|----------------|---------------|---------------|
| H | -20.5934406864 | 0.2397474955  | -2.1434226572 |
| H | -22.5616048716 | -1.5756889794 | 1.4309384145  |
| H | -22.4378783495 | 1.5170223416  | -1.5392798907 |
| H | -25.0151854980 | -1.4824522071 | 1.4249512022  |
| H | -24.8916762728 | 1.5524978691  | -1.6041378553 |
| H | -26.7425182969 | 2.2173382486  | -0.3769458317 |
| H | -26.8823477064 | -2.0379936221 | 0.1513634120  |
| H | -29.1950998027 | 2.2891027662  | -0.4444034825 |
| H | -29.3352802091 | -1.9557723984 | 0.1601383470  |
| H | -31.1697795088 | -1.6383970836 | -1.2287443973 |
| H | -31.0806394871 | 2.0873514420  | 0.8984847284  |
| H | -33.6230496021 | -1.5790010903 | -1.2278529084 |
| H | -33.5310287679 | 2.1834000416  | 0.8312365956  |
| H | 18.1379681762  | 1.2764527731  | -1.6452662874 |
| H | 18.2354946400  | -1.3226030007 | 1.7671698880  |
| H | 20.5909604367  | 1.3431890480  | -1.6640015059 |
| H | 20.6895058992  | -1.3135053134 | 1.7028986796  |
| H | 22.5379011141  | 0.0309634008  | 2.1337222233  |
| H | 22.4631592760  | 0.0596480927  | -2.1561066752 |
| H | 24.9909461287  | 0.0315734135  | 2.0910862244  |
| H | 24.9149300068  | 0.1373342012  | -2.1974510867 |
| H | 26.7992756048  | -1.1578110712 | -1.8151975873 |
| H | 26.8275446000  | 1.3844013895  | 1.6405659307  |
| H | 29.2513824686  | -1.0859364225 | -1.8882428232 |
| H | 29.2816406438  | 1.3985593874  | 1.6097298836  |
| H | 31.1008761769  | 2.2441997798  | 0.4428809557  |
| H | 31.1517062106  | -1.8602228740 | -0.8057709522 |
| H | 33.5553556210  | 2.2797031275  | 0.4235492510  |
| H | 33.6042558341  | -1.8012130004 | -0.8963552849 |
| H | 35.3730005323  | 2.2753903938  | -1.0487330771 |
| H | 35.4845367496  | -1.7261481659 | 0.4973342600  |
| H | 37.8386856871  | 2.3316088585  | -1.0833722201 |
| H | 37.9494730139  | -1.6858516512 | 0.4260178388  |
| H | 39.1434831972  | 0.3475849682  | -0.3549226945 |
| H | -35.4318416117 | 1.1788742418  | 1.7572915705  |
| H | -35.4219265146 | -0.4517793140 | -2.2126193722 |
| H | -37.8950071720 | 1.2815397476  | 1.7094120438  |
| H | -37.8865865723 | -0.3885032934 | -2.2455417338 |
| H | -39.1400754895 | 0.4893743199  | -0.2890198612 |
